# Supplementary material
Source: PubMed Central journal article supplement (PMC3776011)
Supplement: NIHMS490008-supplement-439_2013_1318_MOESM1_ESM.pdf [file NIHMS490008-supplement-439_2013_1318_MOESM1_ESM.pdf]

## Supplementary figure 1

### Distribution of maxdrinks and $\ln(\text{maxdrinks})$ among males and females in COGA and SAGE

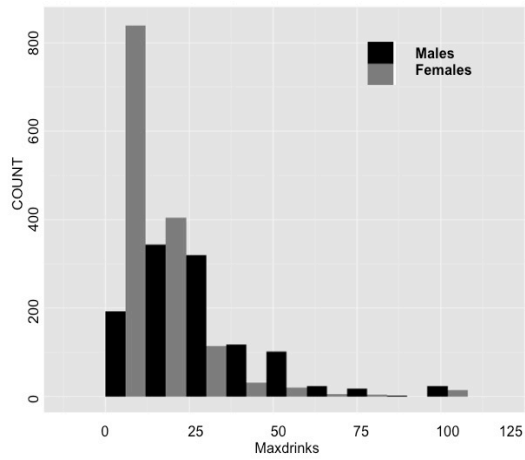

A

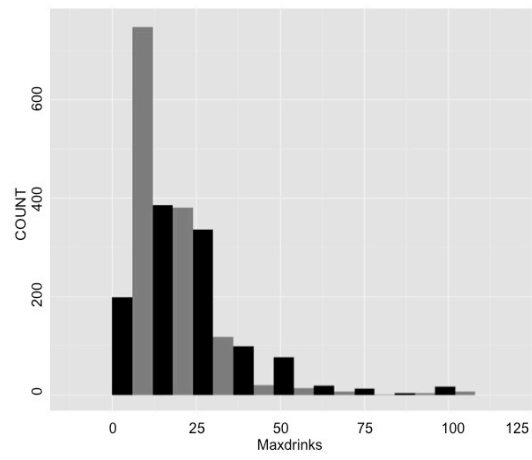

B

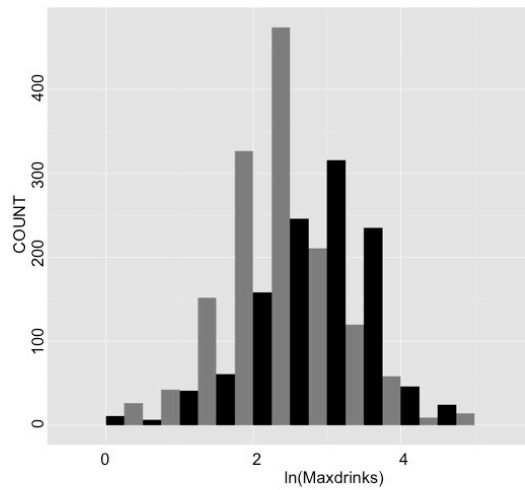

C

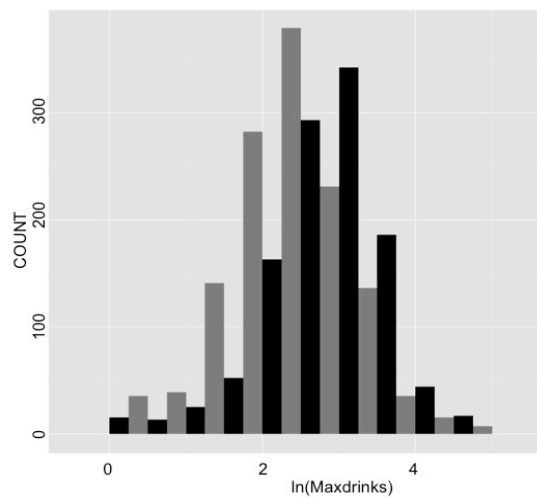

D

A & B shows maxdrinks and  $\ln(\text{maxdrinks})$  distribution in COGA C & D shows distribution maxdrinks and  $\ln(\text{maxdrinks})$  distribution in SAGE dataset. Black and grey color bars represent distributions in males and females respectively.

## Supplementary figure 2

### QQ and Manhattan plot for the genome-wide association analysis in COGA dataset

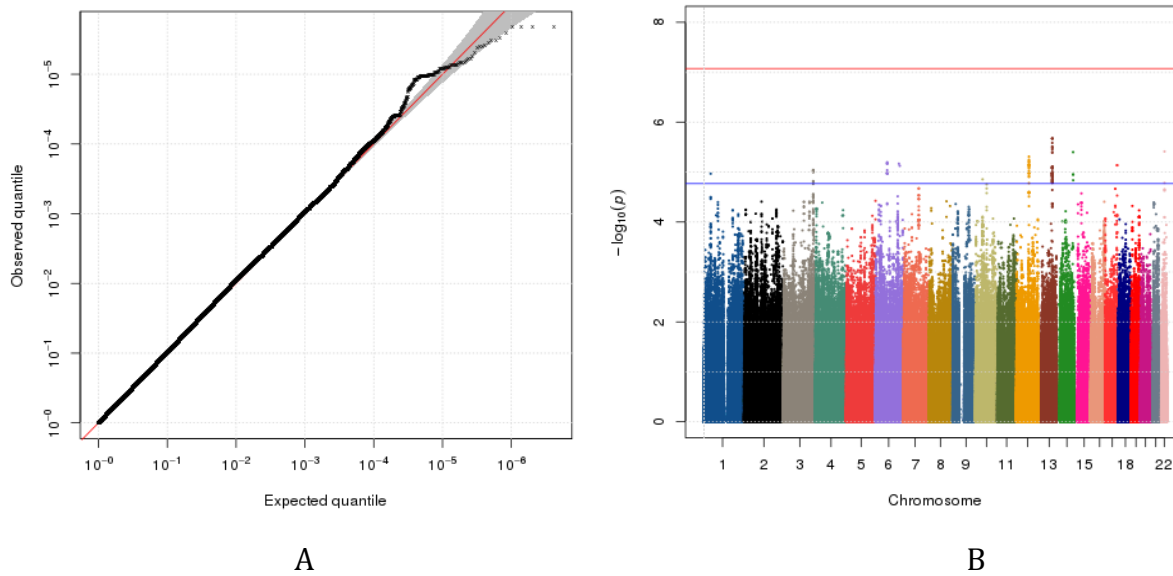

(A) Q-Q plot for association analysis of the alcohol dependence phenotype. Observed  $-\log_{10}(p)$  values for the 4,058,415 SNPs (black dots) and expected  $-\log_{10}(p)$  values (red line) are plotted against the expected  $-\log_{10}(p)$  value (x-axis). The genomic inflation factor value ( $\lambda$ ) was 0.99.

(B) Observed  $-\log_{10}(p)$  values for the 4,058,415 SNPs were plotted for each of the 22 autosomal chromosome in Manhattan plot

### Supplementary figure 3

#### QQ Manhatten plots for the genome-wide analysis of maxdrinks phenotype in SAGE dataset

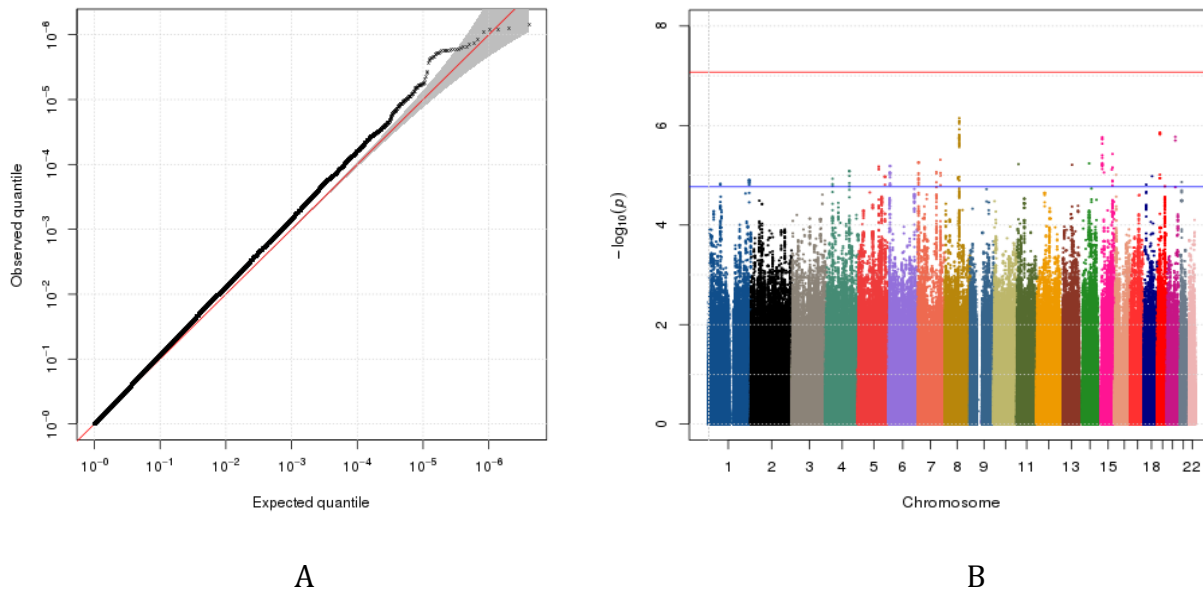

- (A) Q-Q plot for association analysis of the maxdrinks phenotype. Observed  $-\log_{10}(p)$  values for the 4,058,415 SNPs (black dots) and expected  $-\log_{10}(p)$  values (red line) are plotted against the expected  $-\log_{10}(p)$  value (x-axis). The genomic inflation factor value ( $\lambda$ ) was 1.07.
- (B) Observed  $-\log_{10}(p)$  values for the 4,058,415 SNPs were plotted for each of the 22 autosomal chromosomes in Manhattan plot

## Supplementary Figure 4

Regional plot for the variants identified in meta-analysis near in and around *LMO1* gene.

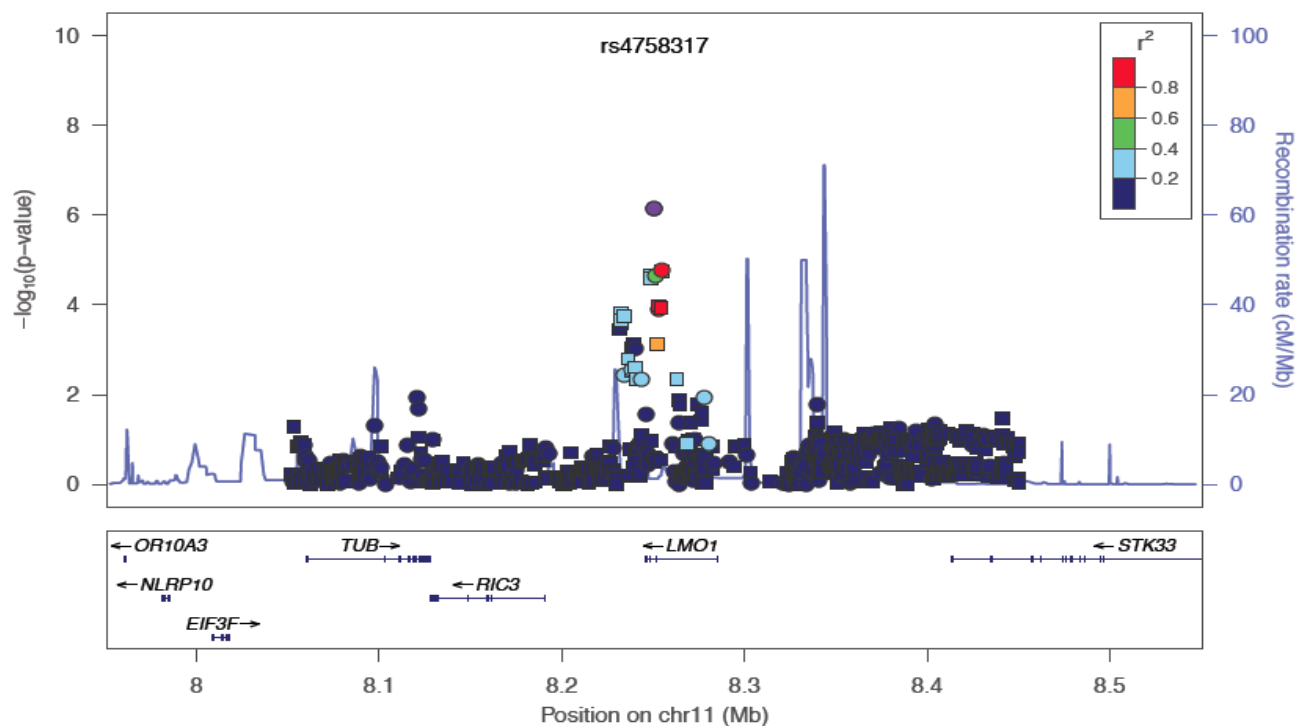

A

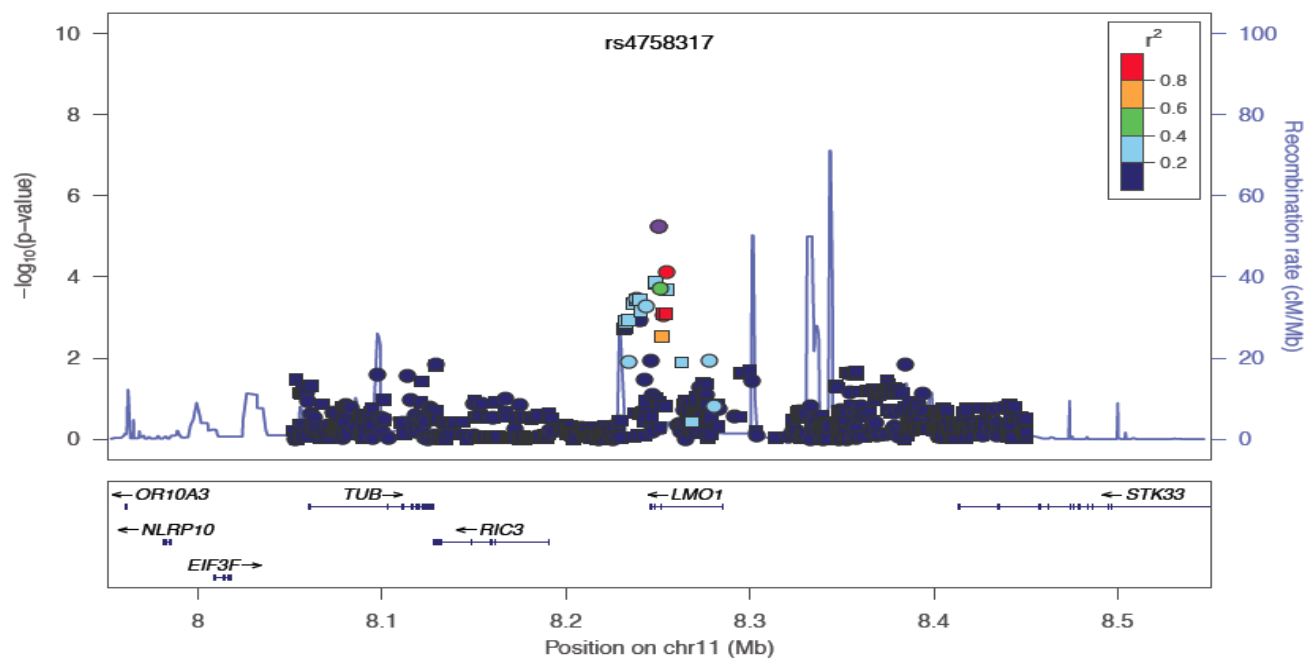

B

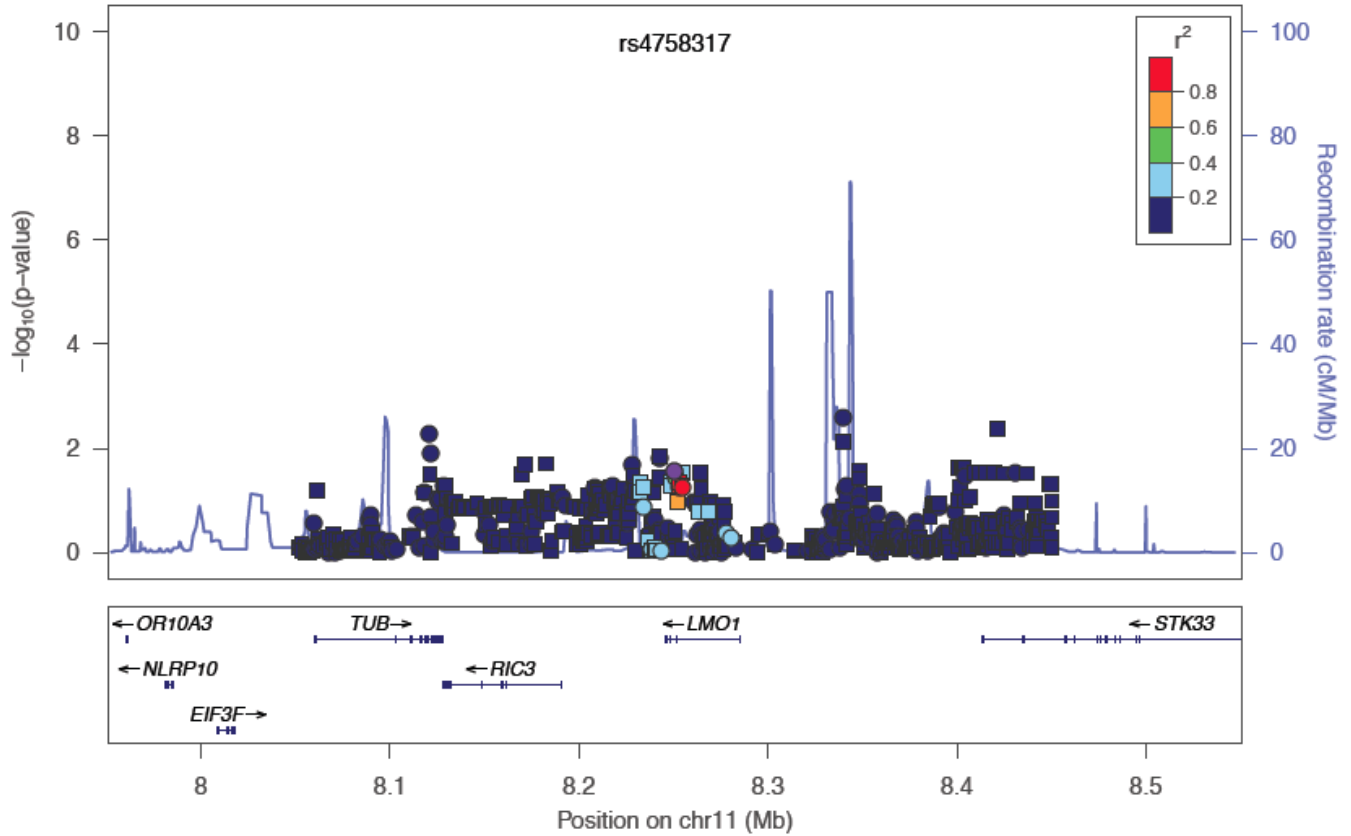

C

Y axis represent  $-\log_{10} P$  values in (A) Meta-analysis (B) SAGE and (c) COGA datasets. Square blue dot represent the strongest signal identified in meta-analysis. The most significantly associated SNP is shown in purple. The extent of linkage disequilibrium (as measured by  $r^2$ ) between each SNP and the most significantly associated SNP in meta-analysis is indicated by the color scale at top right. Larger values of  $r^2$  indicate greater linkage disequilibrium. Circles represent the genotyped SNPs and squares represent the imputed SNPs.

## Supplementary Figure 5

### Regional plot for the variants identified in meta-analysis in and around *PLCL1* gene

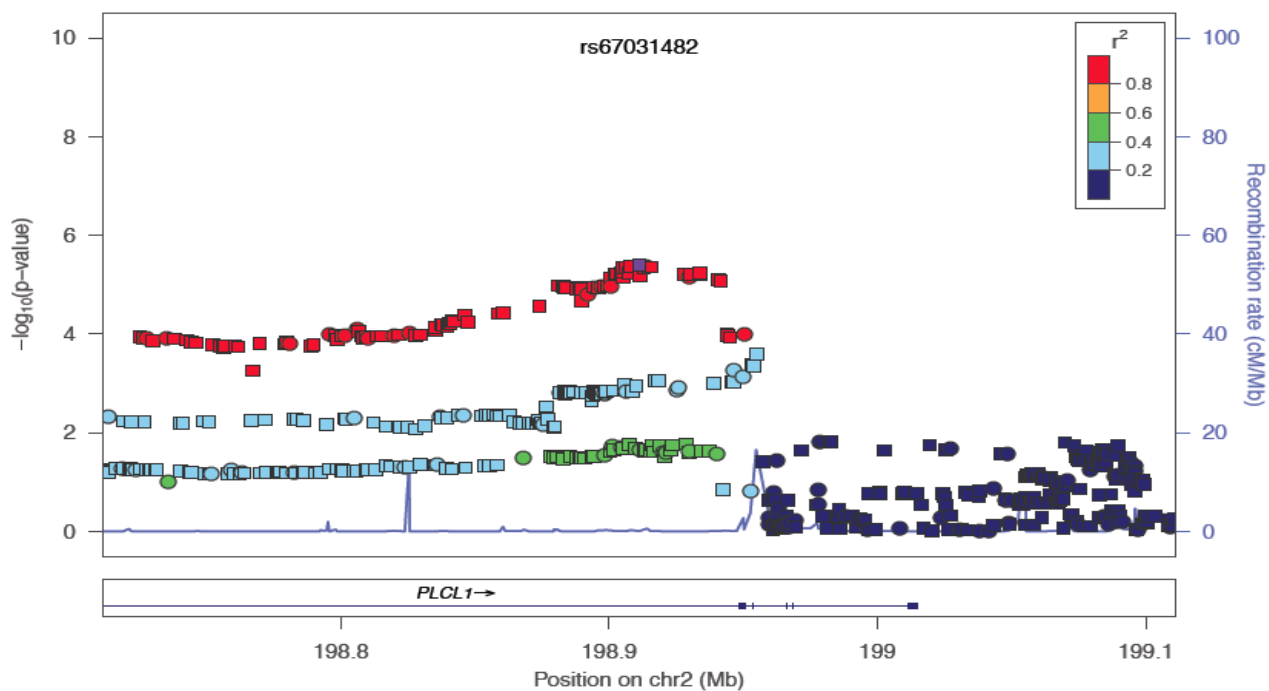

A

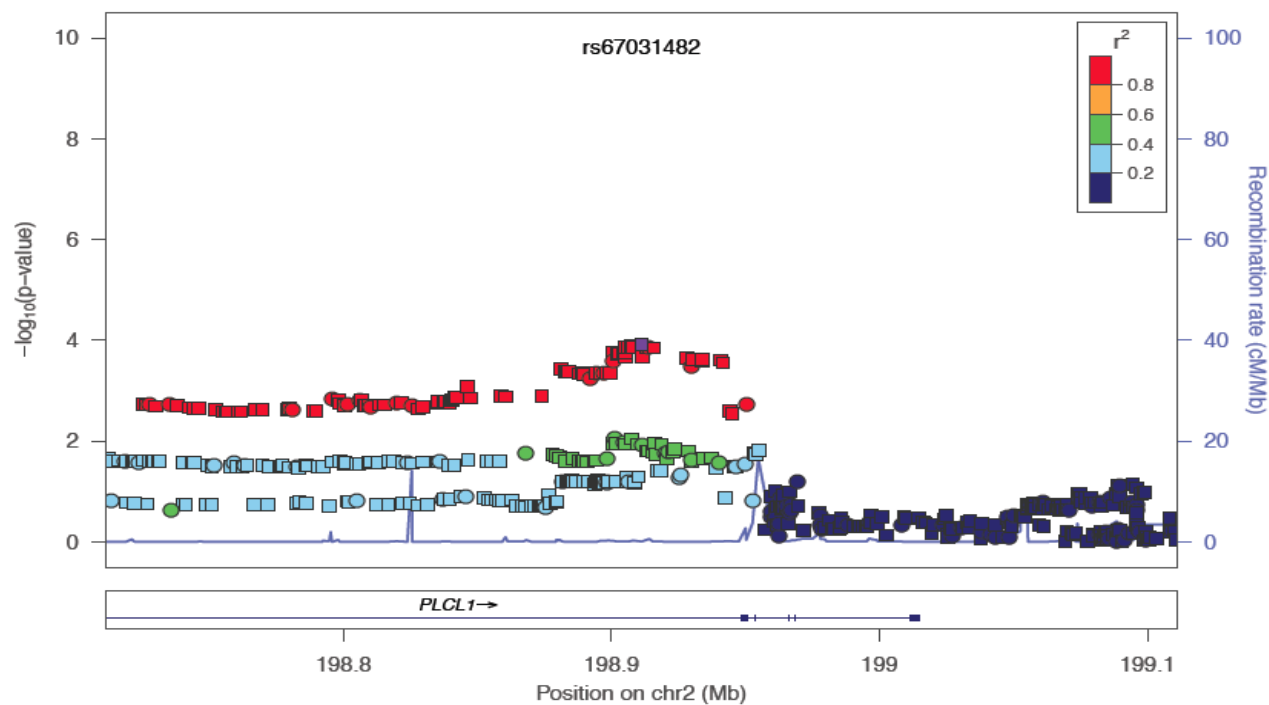

B

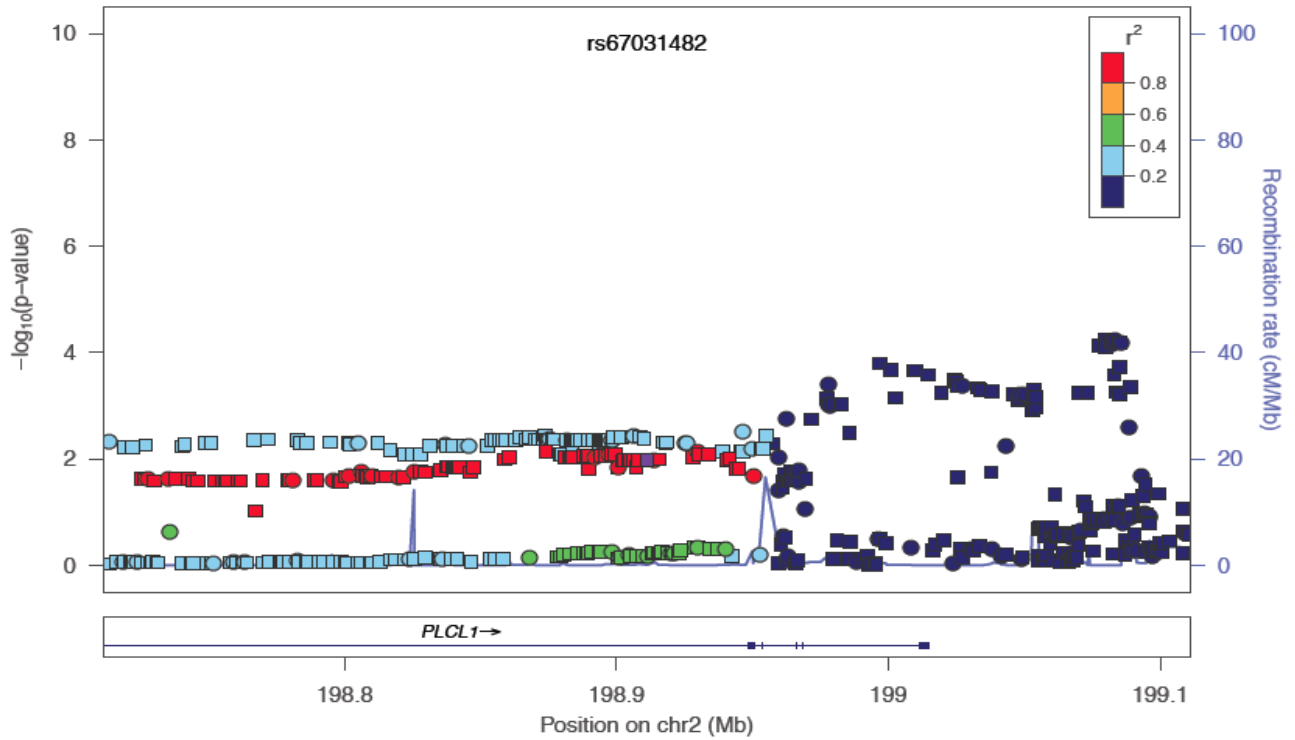

C

Y axis represent  $-\log_{10}$  P values in (A) Meta-analysis (B) SAGE and (c) COGA datasets. Square blue dot represent the strongest signal identified in meta-analysis. (A) Meta-analysis (B) SAGE and (c) COGA. Square blue dot represent the strongest signal identified in meta-analysis. The most significantly associated SNP in meta-analysis is shown in purple. The extent of linkage disequilibrium (as measured by  $r^2$ ) between each SNP and the most significantly associated SNP is indicated by the color scale at top right. Larger values of  $r^2$  indicate greater linkage disequilibrium. Circles represent the genotyped SNPs and squares represent the imputed SNPs.
