# Supplementary material
Source: PubMed Central journal article supplement (PMC3776011)
Supplement: NIHMS490008-supplement-439_2013_1318_MOESM2_ESM.pdf [file NIHMS490008-supplement-439_2013_1318_MOESM2_ESM.pdf]

## Supplementary Table 1

Summary of results for the genotyped and imputed SNPs in COGA and SAGE datasets sorted in ascending order on COGA P values ( $P < 1 \times 10^{-4}$ )

| SNP         | CHR | BP        | A1 | A2 | Gene                | Geno/Imp | MAF <sup>a</sup> | P COGA   | P SAGE   | Dir <sup>b</sup> |
|-------------|-----|-----------|----|----|---------------------|----------|------------------|----------|----------|------------------|
| rs9523520   | 13  | 87499244  | C  | T  | 5' RP11-366K1.1-001 | Imp      | 0.47             | 2.12E-06 | 8.05E-01 | ++               |
| rs4420385   | 13  | 87501789  | A  | T  | 5' RP11-366K1.1-001 | Imp      | 0.47             | 2.12E-06 | 8.15E-01 | --               |
| rs4238296   | 13  | 87506446  | G  | A  | 5' RP11-366K1.1-001 | Imp      | 0.47             | 2.12E-06 | 8.18E-01 | ++               |
| rs9523562   | 13  | 87511042  | G  | A  | 5' RP11-366K1.1-001 | Imp      | 0.47             | 2.12E-06 | 7.83E-01 | ++               |
| rs7982268   | 13  | 87532943  | G  | A  | 5' RP11-366K1.1-001 | G        | 0.47             | 2.59E-06 | 6.73E-01 | ++               |
| rs4773640   | 13  | 87474932  | T  | G  | 5' RP11-366K1.1-001 | Imp      | 0.46             | 3.06E-06 | 6.15E-01 | --               |
| rs9556166   | 13  | 87514739  | G  | T  | 5' RP11-366K1.1-001 | Imp      | 0.46             | 3.24E-06 | 7.51E-01 | ++               |
| rs9556167   | 13  | 87514778  | G  | A  | 5' RP11-366K1.1-001 | Imp      | 0.46             | 3.24E-06 | 7.32E-01 | ++               |
| rs7330816   | 13  | 87534747  | G  | A  | 5' RP11-366K1.1-001 | Imp      | 0.46             | 3.51E-06 | 7.78E-01 | ++               |
| rs2283970   | 22  | 36970287  | C  | T  | CACNG2              | G        | 0.33             | 3.86E-06 | 7.20E-01 | ++               |
| rs9561016   | 13  | 87518870  | G  | T  | 5' RP11-366K1.1-001 | Imp      | 0.46             | 3.96E-06 | 7.40E-01 | ++               |
| rs12891829  | 14  | 101278822 | T  | A  | Near MEG6           | Imp      | 0.19             | 3.98E-06 | 5.57E-01 | +-               |
| rs4238298   | 13  | 87527893  | T  | C  | 5' RP11-366K1.1-001 | Imp      | 0.46             | 4.10E-06 | 6.85E-01 | --               |
| chr12:77157 | 12  | 77157173  | T  | G  | ZDHHC17             | Imp      | 0.19             | 4.90E-06 | 6.93E-01 | ++               |
| chr12:77165 | 12  | 77165733  | C  | A  | ZDHHC17             | Imp      | 0.19             | 5.63E-06 | 6.66E-01 | --               |
| chr12:77178 | 12  | 77178288  | A  | G  | ZDHHC17             | Imp      | 0.20             | 6.10E-06 | 6.92E-01 | ++               |
| chr12:77179 | 12  | 77179491  | T  | C  | ZDHHC17             | Imp      | 0.20             | 6.10E-06 | 6.44E-01 | ++               |
| rs636133    | 6   | 71026091  | T  | G  | NA                  | Imp      | 0.21             | 6.35E-06 | 5.34E-01 | +-               |
| chr12:77258 | 12  | 77258106  | C  | A  | ZDHHC17             | Imp      | 0.20             | 6.43E-06 | 6.58E-01 | --               |
| rs651441    | 6   | 71025017  | T  | G  | NA                  | Imp      | 0.21             | 6.68E-06 | 5.21E-01 | +-               |
| rs536680    | 6   | 71025030  | C  | A  | NA                  | Imp      | 0.21             | 6.68E-06 | 5.23E-01 | +-               |
| rs223592    | 6   | 143725481 | T  | C  | NA                  | G        | 0.09             | 6.79E-06 | 9.05E-01 | --               |
| rs652835    | 6   | 71024675  | C  | G  | NA                  | Imp      | 0.21             | 6.84E-06 | 5.21E-01 | +-               |
| chr12:77258 | 12  | 77258373  | G  | A  | ZDHHC17             | Imp      | 0.20             | 6.95E-06 | 6.53E-01 | --               |
| chr12:77172 | 12  | 77172095  | A  | G  | ZDHHC17             | Imp      | 0.20             | 7.24E-06 | 6.89E-01 | ++               |
| chr12:77172 | 12  | 77172378  | A  | G  | ZDHHC17             | Imp      | 0.20             | 7.24E-06 | 6.80E-01 | ++               |
| chr12:77174 | 12  | 77174623  | T  | C  | ZDHHC17             | Imp      | 0.20             | 7.24E-06 | 6.45E-01 | ++               |
| rs2369350   | 12  | 77176149  | G  | C  | ZDHHC17             | Imp      | 0.20             | 7.24E-06 | 6.45E-01 | --               |
| chr17:73288 | 17  | 73288214  | C  | G  | FV527545            | Imp      | 0.07             | 7.30E-06 | 1.89E-01 | +-               |
| chr17:73289 | 17  | 73289068  | T  | C  | FV527545            | Imp      | 0.07             | 7.30E-06 | 1.84E-01 | +-               |
| rs1890533   | 6   | 148844714 | A  | G  | SASH1               | Imp      | 0.43             | 7.48E-06 | 9.72E-01 | +-               |
| chr12:77200 | 12  | 77200136  | A  | G  | ZDHHC17             | Imp      | 0.19             | 7.60E-06 | 7.35E-01 | ++               |
| rs9515993   | 13  | 87478483  | G  | C  | 5' RP11-366K1.1-001 | Imp      | 0.47             | 7.86E-06 | 5.78E-01 | ++               |
| rs9515995   | 13  | 87479611  | T  | C  | 5' RP11-366K1.1-001 | Imp      | 0.47             | 7.86E-06 | 5.70E-01 | --               |
| rs7337025   | 13  | 87481267  | T  | C  | 5' RP11-366K1.1-001 | Imp      | 0.47             | 7.86E-06 | 5.55E-01 | --               |
| rs9560893   | 13  | 87481783  | G  | T  | 5' RP11-366K1.1-001 | Imp      | 0.47             | 7.86E-06 | 5.65E-01 | ++               |
| rs9560911   | 13  | 87490783  | C  | T  | 5' RP11-366K1.1-001 | Imp      | 0.47             | 7.93E-06 | 7.55E-01 | ++               |
| chr12:77260 | 12  | 77260362  | A  | G  | ZDHHC17             | Imp      | 0.20             | 8.01E-06 | 6.54E-01 | ++               |
| rs7984450   | 13  | 87476225  | T  | G  | 5' RP11-366K1.1-001 | Imp      | 0.47             | 8.21E-06 | 5.84E-01 | --               |
| rs4287439   | 13  | 87475513  | A  | G  | 5' RP11-366K1.1-001 | Imp      | 0.47             | 8.29E-06 | 5.95E-01 | --               |
| rs9556132   | 13  | 87476060  | C  | T  | 5' RP11-366K1.1-001 | Imp      | 0.47             | 8.29E-06 | 5.72E-01 | ++               |
| rs9516118   | 13  | 87552124  | G  | T  | 5' RP11-366K1.1-001 | Imp      | 0.46             | 8.31E-06 | 9.17E-01 | ++               |
| chr12:77261 | 12  | 77261749  | T  | C  | ZDHHC17             | Imp      | 0.19             | 8.32E-06 | 6.50E-01 | ++               |
| rs3015543   | 13  | 87469947  | A  | G  | 5' RP11-366K1.1-001 | Imp      | 0.47             | 8.38E-06 | 6.26E-01 | --               |
| rs3015512   | 13  | 87471178  | C  | A  | 5' RP11-366K1.1-001 | Imp      | 0.47             | 8.38E-06 | 6.30E-01 | ++               |
| rs863809    | 3   | 183450134 | A  | G  | YEATS2              | Imp      | 0.43             | 9.03E-06 | 8.41E-01 | --               |
| rs528480    | 6   | 71019344  | G  | A  | NA                  | Imp      | 0.21             | 9.17E-06 | 4.79E-01 | +-               |
| rs262982    | 3   | 183452125 | A  | G  | YEATS2              | G        | 0.43             | 9.25E-06 | 7.99E-01 | --               |
| rs262981    | 3   | 183452161 | A  | G  | YEATS2              | Imp      | 0.43             | 9.25E-06 | 8.10E-01 | --               |
| rs262980    | 3   | 183452215 | G  | A  | YEATS2              | Imp      | 0.43             | 9.25E-06 | 8.15E-01 | ++               |
| rs262979    | 3   | 183453814 | G  | A  | YEATS2              | Imp      | 0.43             | 9.25E-06 | 8.14E-01 | ++               |
| rs17813667  | 12  | 77190363  | T  | G  | ZDHHC17             | Imp      | 0.20             | 9.33E-06 | 6.34E-01 | ++               |
| rs166398    | 3   | 183446977 | A  | G  | YEATS2              | Imp      | 0.43             | 9.34E-06 | 7.67E-01 | --               |
| rs262984    | 3   | 183451148 | A  | C  | YEATS2              | Imp      | 0.43             | 9.96E-06 | 8.44E-01 | --               |
| rs844210    | 3   | 183450105 | A  | G  | YEATS2              | Imp      | 0.43             | 1.00E-05 | 8.44E-01 | --               |
| rs2992713   | 13  | 87461696  | G  | A  | 5' RP11-366K1.1-001 | Imp      | 0.47             | 1.00E-05 | 5.84E-01 | ++               |

Supp Table1

|             |    |           |   |   |                     |     |      |          |          |    |
|-------------|----|-----------|---|---|---------------------|-----|------|----------|----------|----|
| rs3015542   | 13 | 87451410  | C | G | 5' RP11-366K1.1-001 | Imp | 0.47 | 1.01E-05 | 5.08E-01 | -- |
| rs2992717   | 13 | 87452111  | A | G | 5' RP11-366K1.1-001 | Imp | 0.47 | 1.01E-05 | 5.18E-01 | -- |
| rs7995257   | 13 | 87453249  | A | G | 5' RP11-366K1.1-001 | Imp | 0.47 | 1.01E-05 | 5.22E-01 | -- |
| rs2992707   | 13 | 87454536  | A | G | 5' RP11-366K1.1-001 | Imp | 0.47 | 1.01E-05 | 5.23E-01 | -- |
| rs2992708   | 13 | 87455045  | A | G | 5' RP11-366K1.1-001 | Imp | 0.47 | 1.01E-05 | 5.23E-01 | -- |
| rs2992711   | 13 | 87457101  | T | A | 5' RP11-366K1.1-001 | Imp | 0.47 | 1.01E-05 | 5.13E-01 | ++ |
| rs9515965   | 13 | 87459754  | C | G | 5' RP11-366K1.1-001 | Imp | 0.47 | 1.01E-05 | 5.43E-01 | -- |
| rs2992714   | 13 | 87461949  | G | A | 5' RP11-366K1.1-001 | Imp | 0.47 | 1.01E-05 | 5.55E-01 | ++ |
| chr12:77207 | 12 | 77207785  | C | G | ZDHHC17             | Imp | 0.19 | 1.04E-05 | 7.08E-01 | ++ |
| rs6492625   | 13 | 87547394  | G | A | 5' RP11-366K1.1-001 | Imp | 0.46 | 1.04E-05 | 9.16E-01 | ++ |
| rs9515910   | 13 | 87416030  | T | C | 5' RP11-366K1.1-001 | G   | 0.47 | 1.04E-05 | 5.85E-01 | -- |
| rs35420831  | 13 | 87416276  | G | A | 5' RP11-366K1.1-001 | Imp | 0.47 | 1.04E-05 | 5.89E-01 | ++ |
| rs9523309   | 13 | 87418563  | C | A | 5' RP11-366K1.1-001 | Imp | 0.47 | 1.04E-05 | 5.44E-01 | ++ |
| rs4132042   | 13 | 87422551  | C | A | 5' RP11-366K1.1-001 | Imp | 0.47 | 1.04E-05 | 5.30E-01 | ++ |
| rs9556082   | 13 | 87425067  | G | C | 5' RP11-366K1.1-001 | Imp | 0.47 | 1.04E-05 | 5.36E-01 | ++ |
| rs9523331   | 13 | 87426195  | G | A | 5' RP11-366K1.1-001 | Imp | 0.47 | 1.04E-05 | 5.32E-01 | ++ |
| rs9523333   | 13 | 87427762  | A | G | 5' RP11-366K1.1-001 | Imp | 0.47 | 1.04E-05 | 5.32E-01 | -- |
| rs9523416   | 13 | 87463100  | G | A | 5' RP11-366K1.1-001 | G   | 0.47 | 1.05E-05 | 5.84E-01 | ++ |
| rs9556088   | 13 | 87430634  | T | C | 5' RP11-366K1.1-001 | Imp | 0.47 | 1.05E-05 | 5.26E-01 | -- |
| rs6492549   | 13 | 87434336  | C | T | 5' RP11-366K1.1-001 | Imp | 0.47 | 1.06E-05 | 5.23E-01 | ++ |
| rs4261395   | 13 | 87438236  | G | C | 5' RP11-366K1.1-001 | Imp | 0.47 | 1.06E-05 | 5.23E-01 | ++ |
| rs696990    | 6  | 71022226  | C | T | NA                  | Imp | 0.21 | 1.06E-05 | 4.84E-01 | +  |
| rs667857    | 6  | 71023622  | C | T | NA                  | Imp | 0.21 | 1.06E-05 | 4.69E-01 | +  |
| rs56092951  | 12 | 77195966  | C | T | ZDHHC17             | Imp | 0.20 | 1.06E-05 | 6.87E-01 | -- |
| chr12:77197 | 12 | 77197524  | T | G | ZDHHC17             | Imp | 0.20 | 1.06E-05 | 7.33E-01 | ++ |
| chr12:77199 | 12 | 77199703  | C | A | ZDHHC17             | Imp | 0.20 | 1.06E-05 | 7.34E-01 | -- |
| rs498373    | 6  | 71020330  | T | C | NA                  | G   | 0.21 | 1.06E-05 | 4.39E-01 | +- |
| rs496697    | 6  | 71020471  | T | C | NA                  | Imp | 0.21 | 1.06E-05 | 4.72E-01 | +- |
| rs665761    | 6  | 71020872  | C | T | NA                  | Imp | 0.21 | 1.06E-05 | 4.72E-01 | +- |
| rs9523390   | 13 | 87448481  | C | T | 5' RP11-366K1.1-001 | Imp | 0.47 | 1.07E-05 | 5.00E-01 | ++ |
| rs2781245   | 1  | 41943115  | C | T | EDN2                | Imp | 0.24 | 1.08E-05 | 1.47E-01 | +- |
| rs9301917   | 13 | 87674122  | C | A | 5' RP11-366K1.1-001 | Imp | 0.46 | 1.09E-05 | 9.79E-01 | ++ |
| chr14:10127 | 14 | 101271001 | T | C | Near MEG3           | Imp | 0.18 | 1.11E-05 | 8.72E-01 | +  |
| rs9556102   | 13 | 87439318  | T | C | 5' RP11-366K1.1-001 | Imp | 0.47 | 1.12E-05 | 5.01E-01 | -- |
| rs7332982   | 13 | 87440616  | G | A | 5' RP11-366K1.1-001 | Imp | 0.47 | 1.12E-05 | 5.11E-01 | ++ |
| rs9515957   | 13 | 87445503  | A | G | 5' RP11-366K1.1-001 | Imp | 0.47 | 1.12E-05 | 5.14E-01 | -- |
| rs9515961   | 13 | 87447243  | C | T | 5' RP11-366K1.1-001 | Imp | 0.47 | 1.12E-05 | 5.11E-01 | ++ |
| rs9301746   | 13 | 87448003  | G | T | 5' RP11-366K1.1-001 | Imp | 0.47 | 1.12E-05 | 5.14E-01 | ++ |
| rs7988039   | 13 | 87443524  | C | T | 5' RP11-366K1.1-001 | Imp | 0.48 | 1.13E-05 | 5.47E-01 | ++ |
| rs11623311  | 14 | 101274583 | G | T | Near MEG5           | G   | 0.19 | 1.13E-05 | 7.95E-01 | +- |
| rs7333973   | 13 | 87441079  | G | C | 5' RP11-366K1.1-001 | Imp | 0.47 | 1.19E-05 | 5.00E-01 | ++ |
| rs12430623  | 13 | 87416571  | C | A | 5' RP11-366K1.1-001 | Imp | 0.47 | 1.20E-05 | 5.40E-01 | ++ |
| rs9589198   | 13 | 87417865  | G | C | 5' RP11-366K1.1-001 | Imp | 0.47 | 1.20E-05 | 5.46E-01 | ++ |
| rs9515916   | 13 | 87419768  | A | G | 5' RP11-366K1.1-001 | Imp | 0.47 | 1.20E-05 | 5.26E-01 | -- |
| rs9560782   | 13 | 87423431  | T | C | 5' RP11-366K1.1-001 | Imp | 0.47 | 1.20E-05 | 5.13E-01 | -- |
| rs9515922   | 13 | 87423865  | C | T | 5' RP11-366K1.1-001 | Imp | 0.47 | 1.20E-05 | 5.29E-01 | ++ |
| chr12:77185 | 12 | 77185185  | G | A | ZDHHC17             | Imp | 0.20 | 1.21E-05 | 6.24E-01 | -- |
| rs34520380  | 13 | 87678333  | C | T | 5' RP11-366K1.1-001 | Imp | 0.46 | 1.21E-05 | 9.79E-01 | ++ |
| rs9561480   | 13 | 87679842  | A | G | 5' RP11-366K1.1-001 | Imp | 0.46 | 1.21E-05 | 9.71E-01 | -- |
| rs17757120  | 12 | 77188871  | C | G | ZDHHC17             | Imp | 0.20 | 1.25E-05 | 6.38E-01 | ++ |
| rs9560773   | 13 | 87414522  | C | T | 5' RP11-366K1.1-001 | Imp | 0.47 | 1.27E-05 | 6.15E-01 | ++ |
| rs1543232   | 13 | 87682869  | A | G | 5' RP11-366K1.1-001 | Imp | 0.46 | 1.34E-05 | 9.78E-01 | -- |
| rs6492695   | 13 | 87695546  | G | A | 5' RP11-366K1.1-001 | Imp | 0.47 | 1.36E-05 | 9.94E-01 | +  |
| chr10:43450 | 10 | 43450535  | A | G | NA                  | Imp | 0.07 | 1.39E-05 | 2.45E-01 | +- |
| rs9524345   | 13 | 87700013  | C | T | 5' RP11-366K1.1-001 | Imp | 0.47 | 1.43E-05 | 9.94E-01 | +  |
| rs9524367   | 13 | 87703310  | T | G | 5' RP11-366K1.1-001 | Imp | 0.47 | 1.43E-05 | 9.94E-01 | +- |
| rs1040286   | 13 | 87668544  | T | C | 5' RP11-366K1.1-001 | Imp | 0.46 | 1.44E-05 | 8.80E-01 | -- |
| rs56496491  | 13 | 87668961  | T | C | 5' RP11-366K1.1-001 | Imp | 0.46 | 1.44E-05 | 8.68E-01 | -- |
| rs8016400   | 14 | 101271179 | T | C | Near MEG4           | Imp | 0.18 | 1.46E-05 | 8.76E-01 | +  |
| rs2685792   | 13 | 87627796  | A | C | 5' RP11-366K1.1-001 | Imp | 0.46 | 1.48E-05 | 8.98E-01 | -- |
| rs2685793   | 13 | 87629552  | G | A | 5' RP11-366K1.1-001 | Imp | 0.46 | 1.48E-05 | 9.20E-01 | ++ |
| rs2685796   | 13 | 87603946  | A | G | 5' RP11-366K1.1-001 | Imp | 0.46 | 1.51E-05 | 9.12E-01 | -- |

Supp Table1

|                  |          |                  |          |          |                     |            |             |                 |                 |           |
|------------------|----------|------------------|----------|----------|---------------------|------------|-------------|-----------------|-----------------|-----------|
| rs262972         | 3        | 183444520        | G        | A        | YEATS2              | Imp        | 0.43        | 1.52E-05        | 7.56E-01        | ++        |
| rs262971         | 3        | 183444528        | G        | A        | YEATS2              | Imp        | 0.43        | 1.52E-05        | 7.56E-01        | ++        |
| rs262970         | 3        | 183446034        | C        | T        | YEATS2              | Imp        | 0.43        | 1.57E-05        | 7.51E-01        | ++        |
| rs8000914        | 13       | 87638878         | T        | C        | 5' RP11-366K1.1-001 | Imp        | 0.46        | 1.58E-05        | 8.92E-01        | --        |
| rs9556308        | 13       | 87641649         | G        | T        | 5' RP11-366K1.1-001 | Imp        | 0.46        | 1.58E-05        | 8.84E-01        | ++        |
| rs2049200        | 13       | 87643970         | A        | G        | 5' RP11-366K1.1-001 | Imp        | 0.46        | 1.58E-05        | 8.94E-01        | --        |
| rs7319660        | 13       | 87645657         | A        | G        | 5' RP11-366K1.1-001 | Imp        | 0.46        | 1.58E-05        | 9.04E-01        | --        |
| rs1522014        | 13       | 87658986         | A        | G        | 5' RP11-366K1.1-001 | Imp        | 0.46        | 1.64E-05        | 9.16E-01        | --        |
| rs9524365        | 13       | 87702747         | A        | T        | 5' RP11-366K1.1-001 | Imp        | 0.47        | 1.64E-05        | 9.88E-01        | --        |
| rs5995310        | 22       | 36967874         | A        | G        | CACNG2              | Imp        | 0.43        | 1.64E-05        | 8.49E-01        | +-        |
| chr12:77141      | 12       | 77141271         | T        | C        | ZDHHC17             | Imp        | 0.19        | 1.66E-05        | 8.42E-01        | ++        |
| rs830177         | 3        | 183444733        | G        | A        | YEATS2              | Imp        | 0.43        | 1.73E-05        | 7.51E-01        | ++        |
| rs10997437       | 10       | 68661910         | A        | G        | CTNNA3              | Imp        | 0.39        | 1.76E-05        | 4.10E-02        | +-        |
| rs13238101       | 7        | 95498480         | G        | A        | DYNC111             | Imp        | 0.12        | 2.13E-05        | 9.57E-01        | --        |
| rs13238270       | 7        | 95498489         | T        | C        | DYNC111             | Imp        | 0.12        | 2.13E-05        | 9.59E-01        | ++        |
| rs999186         | 10       | 68675367         | G        | A        | CTNNA3              | Imp        | 0.39        | 2.13E-05        | 2.51E-02        | +         |
| rs735621         | 17       | 62060718         | A        | G        | NA                  | G          | 0.35        | 2.16E-05        | 3.07E-01        | ++        |
| rs9910406        | 17       | 62060878         | G        | A        | NA                  | Imp        | 0.35        | 2.16E-05        | 3.25E-01        | --        |
| rs1569488        | 22       | 36965284         | C        | T        | CACNG2              | G          | 0.43        | 2.22E-05        | 9.70E-01        | ++        |
| rs1569489        | 22       | 36965492         | G        | C        | CACNG2              | Imp        | 0.44        | 2.27E-05        | 9.77E-01        | ++        |
| rs1718017        | 13       | 87596099         | G        | A        | 5' RP11-366K1.1-001 | Imp        | 0.46        | 2.28E-05        | 9.89E-01        | ++        |
| rs1569490        | 22       | 36966209         | T        | C        | CACNG2              | Imp        | 0.44        | 2.35E-05        | 9.17E-01        | +-        |
| rs17813975       | 12       | 77216281         | A        | G        | ZDHHC17             | G          | 0.19        | 2.50E-05        | 6.38E-01        | ++        |
| chr12:77145      | 12       | 77145183         | A        | G        | ZDHHC17             | Imp        | 0.19        | 2.52E-05        | 6.58E-01        | ++        |
| chr12:77221      | 12       | 77221993         | A        | G        | ZDHHC17             | Imp        | 0.20        | 2.60E-05        | 6.37E-01        | ++        |
| chr12:77223      | 12       | 77223088         | C        | T        | ZDHHC17             | Imp        | 0.20        | 2.60E-05        | 6.38E-01        | --        |
| chr12:77226      | 12       | 77226491         | G        | A        | ZDHHC17             | Imp        | 0.20        | 2.60E-05        | 6.38E-01        | --        |
| chr12:77227      | 12       | 77227200         | G        | A        | ZDHHC17             | Imp        | 0.20        | 2.60E-05        | 6.38E-01        | --        |
| rs1925584        | 10       | 68669211         | A        | G        | CTNNA3              | Imp        | 0.39        | 2.63E-05        | 3.35E-02        | +-        |
| rs8023560        | 15       | 45072082         | G        | T        | LOC100419583        | Imp        | 0.10        | 2.67E-05        | 8.15E-01        | +         |
| rs1061594        | 3        | 183534170        | T        | C        | MAP6D1              | G          | 0.46        | 2.77E-05        | 6.81E-01        | +-        |
| rs1061593        | 3        | 183534538        | C        | T        | MAP6D1              | G          | 0.46        | 2.79E-05        | 7.49E-01        | ++        |
| rs2606225        | 3        | 183534487        | C        | G        | MAP6D1              | Imp        | 0.46        | 2.90E-05        | 7.37E-01        | +-        |
| rs2606226        | 3        | 183534494        | T        | G        | MAP6D1              | Imp        | 0.46        | 2.90E-05        | 7.35E-01        | +-        |
| rs13238387       | 7        | 95498622         | G        | C        | DYNC111             | Imp        | 0.13        | 2.92E-05        | 9.53E-01        | --        |
| rs3757696        | 7        | 95499066         | A        | C        | DYNC111             | Imp        | 0.13        | 2.92E-05        | 9.38E-01        | ++        |
| rs1488503        | 7        | 95500522         | T        | C        | DYNC111             | G          | 0.13        | 2.92E-05        | 9.58E-01        | +         |
| rs55805625       | 17       | 73347113         | C        | G        | GRB2                | Imp        | 0.07        | 2.95E-05        | 1.82E-01        | ++        |
| rs11154829       | 6        | 136247928        | T        | C        | PDE7B               | G          | 0.29        | 3.05E-05        | 6.42E-01        | +-        |
| chr12:77251      | 12       | 77251216         | C        | T        | ZDHHC17             | Imp        | 0.19        | 3.08E-05        | 6.04E-01        | --        |
| rs2582092        | 3        | 183533623        | G        | C        | MAP6D1              | Imp        | 0.46        | 3.09E-05        | 7.43E-01        | ++        |
| rs263045         | 3        | 183515314        | G        | A        | YEATS2              | Imp        | 0.46        | 3.11E-05        | 7.59E-01        | ++        |
| rs2255019        | 3        | 183534913        | G        | A        | MAP6D1              | Imp        | 0.46        | 3.15E-05        | 7.33E-01        | ++        |
| rs2255015        | 3        | 183534976        | A        | G        | MAP6D1              | G          | 0.46        | 3.16E-05        | 5.53E-01        | +-        |
| rs870936         | 1        | 41939408         | T        | A        | EDN2                | Imp        | 0.23        | 3.17E-05        | 2.53E-01        | +-        |
| rs2492075        | 1        | 41941088         | A        | C        | EDN2                | Imp        | 0.23        | 3.24E-05        | 2.32E-01        | ++        |
| rs2582091        | 3        | 183535094        | T        | C        | MAP6D1              | Imp        | 0.46        | 3.39E-05        | 7.74E-01        | +-        |
| rs12069358       | 1        | 41940687         | T        | C        | EDN2                | G          | 0.23        | 3.45E-05        | 2.51E-01        | ++        |
| chr7:954970      | 7        | 95497037         | A        | G        | DYNC111             | Imp        | 0.11        | 3.46E-05        | 7.33E-01        | ++        |
| rs34657318       | 7        | 95497161         | A        | G        | DYNC111             | Imp        | 0.11        | 3.46E-05        | 9.69E-01        | ++        |
| rs35703327       | 7        | 95497235         | T        | C        | DYNC111             | Imp        | 0.11        | 3.46E-05        | 9.69E-01        | ++        |
| rs12656368       | 5        | 179653428        | T        | C        | NA                  | G          | 0.49        | 3.76E-05        | 6.15E-01        | --        |
| rs263021         | 3        | 183509168        | G        | A        | YEATS2              | Imp        | 0.46        | 3.78E-05        | 7.54E-01        | ++        |
| rs262961         | 3        | 183491340        | C        | T        | YEATS2              | Imp        | 0.45        | 3.82E-05        | 7.67E-01        | ++        |
| rs262958         | 3        | 183492988        | A        | G        | YEATS2              | Imp        | 0.45        | 3.82E-05        | 7.11E-01        | +-        |
| rs263044         | 3        | 183517999        | G        | A        | YEATS2              | Imp        | 0.46        | 3.83E-05        | 7.57E-01        | ++        |
| <b>rs6996005</b> | <b>8</b> | <b>107532927</b> | <b>G</b> | <b>T</b> | <b>OXR1</b>         | <b>Imp</b> | <b>0.29</b> | <b>3.84E-05</b> | <b>5.66E-02</b> | <b>++</b> |
| rs9877910        | 3        | 159730819        | T        | C        | FLJ39842            | Imp        | 0.39        | 3.90E-05        | 6.54E-01        | --        |
| rs263022         | 3        | 183510782        | A        | T        | YEATS2              | Imp        | 0.46        | 3.90E-05        | 7.49E-01        | +-        |
| rs4368325        | 2        | 107109716        | A        | G        | AC108868.4          | Imp        | 0.34        | 3.91E-05        | 3.44E-01        | ++        |
| rs9922943        | 16       | 84067570         | T        | C        | SLC38A8             | Imp        | 0.24        | 3.92E-05        | 1.75E-01        | ++        |
| rs2606219        | 3        | 183494455        | A        | G        | YEATS2              | Imp        | 0.45        | 3.93E-05        | 7.39E-01        | +-        |

Supp Table1

|                 |           |                 |          |          |                     |          |             |                 |                 |           |
|-----------------|-----------|-----------------|----------|----------|---------------------|----------|-------------|-----------------|-----------------|-----------|
| rs262962        | 3         | 183491155       | C        | T        | YEATS2              | Imp      | 0.45        | 3.94E-05        | 8.11E-01        | ++        |
| rs4646719       | 3         | 125866621       | A        | G        | ALDH1L1             | Imp      | 0.06        | 3.95E-05        | 9.84E-02        | ++        |
| rs4646718       | 3         | 125867263       | A        | C        | ALDH1L1             | Imp      | 0.06        | 3.95E-05        | 1.27E-01        | ++        |
| rs263010        | 3         | 183497506       | G        | A        | YEATS2              | Imp      | 0.45        | 3.96E-05        | 7.34E-01        | ++        |
| rs263040        | 3         | 183522557       | C        | T        | YEATS2              | Imp      | 0.46        | 3.96E-05        | 7.56E-01        | ++        |
| rs263039        | 3         | 183522929       | T        | C        | YEATS2              | Imp      | 0.46        | 3.96E-05        | 7.53E-01        | +-        |
| rs263035        | 3         | 183523657       | G        | A        | YEATS2              | Imp      | 0.46        | 3.96E-05        | 7.53E-01        | ++        |
| rs263034        | 3         | 183524193       | C        | T        | YEATS2              | Imp      | 0.46        | 3.96E-05        | 7.53E-01        | ++        |
| rs263033        | 3         | 183524349       | G        | C        | YEATS2              | Imp      | 0.46        | 3.96E-05        | 7.56E-01        | ++        |
| rs263032        | 3         | 183524379       | G        | A        | YEATS2              | Imp      | 0.46        | 3.96E-05        | 7.54E-01        | +         |
| rs263031        | 3         | 183524948       | C        | T        | YEATS2              | Imp      | 0.46        | 3.96E-05        | 8.15E-01        | ++        |
| rs263030        | 3         | 183525121       | G        | A        | YEATS2              | Imp      | 0.46        | 3.96E-05        | 7.53E-01        | ++        |
| rs263029        | 3         | 183525414       | G        | A        | YEATS2              | Imp      | 0.46        | 3.96E-05        | 7.51E-01        | +         |
| rs263028        | 3         | 183525519       | A        | G        | YEATS2              | Imp      | 0.46        | 3.96E-05        | 8.14E-01        | +-        |
| rs263027        | 3         | 183526418       | C        | T        | YEATS2              | Imp      | 0.46        | 3.96E-05        | 8.15E-01        | ++        |
| rs263026        | 3         | 183526624       | A        | C        | YEATS2              | Imp      | 0.46        | 3.96E-05        | 7.84E-01        | +-        |
| rs263025        | 3         | 183527618       | C        | T        | YEATS2              | Imp      | 0.46        | 3.96E-05        | 8.05E-01        | ++        |
| rs9836489       | 3         | 183530518       | G        | A        | YEATS2              | Imp      | 0.46        | 3.96E-05        | 7.36E-01        | ++        |
| rs28650940      | 3         | 183530978       | A        | G        | YEATS2              | Imp      | 0.46        | 3.96E-05        | 8.11E-01        | +-        |
| rs28546070      | 3         | 183530986       | G        | A        | YEATS2              | Imp      | 0.46        | 3.96E-05        | 7.48E-01        | +         |
| rs28692912      | 3         | 183531286       | A        | G        | YEATS2              | Imp      | 0.46        | 3.96E-05        | 8.10E-01        | +-        |
| rs62285795      | 3         | 183531889       | C        | T        | MAP6D1              | Imp      | 0.46        | 3.96E-05        | 8.02E-01        | ++        |
| rs2606221       | 3         | 183533057       | C        | T        | MAP6D1              | Imp      | 0.46        | 3.96E-05        | 7.91E-01        | ++        |
| rs8391          | 3         | 183533964       | C        | T        | MAP6D1              | Imp      | 0.46        | 3.96E-05        | 7.21E-01        | ++        |
| rs263024        | 3         | 183528442       | T        | C        | YEATS2              | G        | 0.46        | 3.97E-05        | 5.57E-01        | +-        |
| rs262955        | 3         | 183485983       | C        | A        | YEATS2              | Imp      | 0.45        | 3.98E-05        | 7.98E-01        | ++        |
| rs262957        | 3         | 183486300       | C        | T        | YEATS2              | Imp      | 0.45        | 3.98E-05        | 7.93E-01        | ++        |
| rs830166        | 3         | 183487393       | G        | A        | YEATS2              | Imp      | 0.45        | 3.98E-05        | 7.93E-01        | ++        |
| rs262964        | 3         | 183490998       | A        | C        | YEATS2              | Imp      | 0.45        | 3.98E-05        | 8.19E-01        | +-        |
| rs263043        | 3         | 183520489       | G        | A        | YEATS2              | Imp      | 0.46        | 3.99E-05        | 7.47E-01        | +         |
| rs263042        | 3         | 183521133       | G        | A        | YEATS2              | Imp      | 0.46        | 3.99E-05        | 8.00E-01        | ++        |
| rs1395714       | 1         | 86690718        | T        | A        | Near COL24A1        | Imp      | 0.15        | 4.00E-05        | 5.64E-01        | ++        |
| chr21:18300     | 21        | 18300148        | G        | A        | NA                  | Imp      | 0.15        | 4.04E-05        | 6.75E-01        | +-        |
| rs263038        | 3         | 183523021       | A        | G        | YEATS2              | Imp      | 0.46        | 4.08E-05        | 7.64E-01        | +-        |
| rs263037        | 3         | 183523205       | G        | A        | YEATS2              | Imp      | 0.46        | 4.08E-05        | 7.63E-01        | ++        |
| rs1061562       | 4         | 41700361        | G        | A        | LIMCH1              | G        | 0.21        | 4.08E-05        | 5.21E-01        | ++        |
| rs11852254      | 15        | 45083843        | A        | G        | LOC100419583        | Imp      | 0.14        | 4.09E-05        | 7.65E-01        | +-        |
| rs11853207      | 15        | 45084880        | A        | C        | LOC100419583        | Imp      | 0.14        | 4.09E-05        | 6.03E-01        | +-        |
| rs2049333       | 15        | 45085225        | A        | G        | LOC100419583        | G        | 0.14        | 4.09E-05        | 6.02E-01        | +-        |
| rs196351        | 3         | 183499772       | G        | A        | YEATS2              | Imp      | 0.45        | 4.10E-05        | 7.56E-01        | +         |
| rs263014        | 3         | 183500702       | C        | G        | YEATS2              | Imp      | 0.45        | 4.10E-05        | 7.54E-01        | +-        |
| rs9824967       | 3         | 159722333       | G        | A        | FLJ39842            | Imp      | 0.39        | 4.17E-05        | 5.66E-01        | ++        |
| rs3110181       | 15        | 45069921        | A        | C        | LOC100419583        | Imp      | 0.10        | 4.21E-05        | 9.62E-01        | --        |
| rs58638896      | 6         | 71017964        | G        | A        | Ambiguous           | Imp      | 0.20        | 4.22E-05        | 4.75E-01        | ++        |
| <b>rs463877</b> | <b>21</b> | <b>22090256</b> | <b>T</b> | <b>C</b> | <b>Near NCAM2</b>   | <b>G</b> | <b>0.10</b> | <b>4.26E-05</b> | <b>4.49E-02</b> | <b>++</b> |
| rs951521        | 13        | 87750315        | C        | G        | 5' RP11-366K1.1-001 | Imp      | 0.49        | 4.26E-05        | 8.24E-01        | --        |
| rs8180560       | 6         | 136299725       | A        | C        | PDE7B               | Imp      | 0.38        | 4.28E-05        | 6.81E-01        | --        |
| chr13:87744     | 13        | 87744450        | A        | T        | 5' RP11-366K1.1-001 | Imp      | 0.49        | 4.28E-05        | 8.31E-01        | --        |
| rs1522005       | 13        | 87747482        | A        | C        | 5' RP11-366K1.1-001 | Imp      | 0.49        | 4.28E-05        | 8.38E-01        | --        |
| rs7045081       | 9         | 18199967        | G        | A        | NA                  | Imp      | 0.23        | 4.36E-05        | 4.57E-01        | +         |
| <b>rs229369</b> | <b>21</b> | <b>22078587</b> | <b>G</b> | <b>A</b> | <b>Near NCAM2</b>   | <b>G</b> | <b>0.13</b> | <b>4.40E-05</b> | <b>4.87E-02</b> | <b>--</b> |
| rs61481973      | 13        | 87738945        | G        | A        | 5' RP11-366K1.1-001 | Imp      | 0.49        | 4.41E-05        | 8.27E-01        | ++        |
| rs17116771      | 15        | 23907160        | A        | G        | NA                  | G        | 0.16        | 4.42E-05        | 1.78E-01        | +         |
| rs1321064       | 6         | 71018467        | A        | G        | NA                  | Imp      | 0.20        | 4.42E-05        | 3.97E-01        | +-        |
| rs3828858       | 6         | 20480586        | G        | A        | E2F3                | G        | 0.15        | 4.52E-05        | 9.58E-01        | ++        |
| rs1336050       | 1         | 86688478        | G        | T        | Near COL24A1        | G        | 0.15        | 4.52E-05        | 6.28E-01        | +         |
| chr21:18297     | 21        | 18297430        | G        | A        | NA                  | Imp      | 0.15        | 4.55E-05        | 7.66E-01        | +-        |
| rs3134954       | 6         | 32071893        | C        | T        | TNXB                | G        | 0.13        | 4.70E-05        | 5.14E-01        | --        |
| rs8069172       | 17        | 62058291        | G        | C        | NA                  | Imp      | 0.35        | 4.70E-05        | 3.18E-01        | --        |
| rs9524530       | 13        | 87737281        | T        | G        | 5' RP11-366K1.1-001 | Imp      | 0.49        | 4.75E-05        | 8.41E-01        | --        |
| rs2910443       | 19        | 8576307         | G        | A        | ZNF414              | G        | 0.48        | 4.77E-05        | 7.32E-01        | ++        |
| rs7843894       | 8         | 130057819       | A        | G        | NA                  | G        | 0.09        | 4.79E-05        | 3.02E-01        | --        |

Supp Table1

|             |    |           |   |   |                     |     |      |          |          |    |
|-------------|----|-----------|---|---|---------------------|-----|------|----------|----------|----|
| rs3117181   | 6  | 32071017  | C | G | TNXB                | Imp | 0.13 | 4.81E-05 | 5.14E-01 | ++ |
| rs10667     | 12 | 77247150  | C | T | ZDHC17              | G   | 0.20 | 4.81E-05 | 6.02E-01 | -- |
| rs16837171  | 3  | 125871773 | T | C | ALDH1L1             | G   | 0.06 | 4.83E-05 | 7.60E-02 | +- |
| rs6493109   | 15 | 45016431  | A | G | LOC100419583        | Imp | 0.10 | 4.88E-05 | 9.81E-01 | -- |
| rs17167196  | 7  | 95496797  | T | G | DYNC111             | Imp | 0.10 | 4.88E-05 | 6.92E-01 | ++ |
| rs7999104   | 13 | 87736974  | G | A | 5' RP11-366K1.1-001 | G   | 0.49 | 4.91E-05 | 8.50E-01 | ++ |
| rs10820243  | 9  | 99051197  | T | C | HSD17B3             | Imp | 0.45 | 4.96E-05 | 2.79E-01 | +- |
| rs7072747   | 10 | 68655205  | T | C | CTNNA3              | Imp | 0.39 | 4.97E-05 | 3.95E-02 | +- |
| rs9524520   | 13 | 87734185  | A | G | 5' RP11-366K1.1-001 | Imp | 0.49 | 5.05E-05 | 8.70E-01 | -- |
| rs11653059  | 17 | 62067353  | G | A | NA                  | G   | 0.38 | 5.05E-05 | 6.28E-01 | -- |
| rs3732543   | 3  | 125870596 | G | T | ALDH1L1             | Imp | 0.06 | 5.06E-05 | 1.45E-01 | +- |
| chr21:18296 | 21 | 18296210  | G | A | NA                  | Imp | 0.15 | 5.10E-05 | 7.85E-01 | +- |
| rs1383878   | 8  | 13466593  | G | A | NA                  | Imp | 0.46 | 5.28E-05 | 3.31E-01 | ++ |
| rs4425307   | 4  | 5993510   | T | C | CRMP1               | Imp | 0.20 | 5.35E-05 | 2.29E-01 | ++ |
| rs6576820   | 1  | 86689338  | A | G | Near COL24A1        | Imp | 0.15 | 5.38E-05 | 5.53E-01 | +- |
| rs59584644  | 4  | 5993897   | G | A | CRMP1               | Imp | 0.20 | 5.45E-05 | 1.87E-01 | -- |
| chr4:599392 | 4  | 5993920   | G | A | CRMP1               | Imp | 0.20 | 5.45E-05 | 1.96E-01 | -- |
| rs262978    | 3  | 183454766 | T | C | YEATS2              | Imp | 0.46 | 5.46E-05 | 7.82E-01 | -- |
| rs61611673  | 4  | 5993722   | G | A | CRMP1               | Imp | 0.20 | 5.51E-05 | 2.25E-01 | -- |
| chr9:100981 | 9  | 100981903 | A | G | TBC1D2              | Imp | 0.06 | 5.55E-05 | 3.81E-01 | +- |
| rs28504114  | 9  | 100981906 | T | C | TBC1D2              | Imp | 0.06 | 5.55E-05 | 3.87E-01 | +- |
| rs12660613  | 6  | 20464452  | G | A | E2F3                | Imp | 0.15 | 5.55E-05 | 9.29E-01 | +- |
| rs1598659   | 2  | 199079730 | G | C | FLJ59788            | Imp | 0.12 | 5.60E-05 | 7.24E-01 | +- |
| rs4145375   | 2  | 9773678   | G | A | BI547681            | Imp | 0.07 | 5.66E-05 | 8.47E-02 | +- |
| rs3110676   | 15 | 45067316  | T | C | LOC100419583        | G   | 0.10 | 5.69E-05 | 9.24E-01 | -- |
| rs4309775   | 4  | 5993506   | T | G | CRMP1               | Imp | 0.20 | 5.71E-05 | 2.13E-01 | ++ |
| rs56068986  | 2  | 9773878   | G | C | BI547681            | Imp | 0.07 | 5.74E-05 | 8.29E-02 | +- |
| rs34218476  | 4  | 169996896 | G | A | NA                  | Imp | 0.20 | 5.79E-05 | 3.44E-01 | ++ |
| chr7:954486 | 7  | 95448622  | G | A | DYNC111             | Imp | 0.10 | 5.81E-05 | 8.38E-01 | -- |
| rs1113416   | 1  | 177936027 | C | T | SEC16B              | Imp | 0.45 | 5.82E-05 | 3.50E-01 | -- |
| rs2140381   | 10 | 68684626  | T | C | CTNNA3              | Imp | 0.38 | 5.82E-05 | 2.78E-02 | +- |
| rs1113415   | 1  | 177935930 | A | G | SEC16B              | Imp | 0.45 | 5.83E-05 | 3.53E-01 | ++ |
| rs1001281   | 19 | 50294759  | C | T | AP2A1               | Imp | 0.19 | 5.84E-05 | 3.04E-01 | -- |
| rs2342756   | 2  | 199083237 | T | C | FLJ59788            | G   | 0.12 | 5.90E-05 | 8.67E-01 | +- |
| rs12630887  | 3  | 60094030  | A | G | FHIT                | Imp | 0.38 | 5.93E-05 | 1.25E-01 | ++ |
| rs28618144  | 6  | 20449904  | A | G | E2F3                | Imp | 0.13 | 5.93E-05 | 6.45E-01 | -- |
| rs10112780  | 8  | 13467552  | A | T | NA                  | Imp | 0.46 | 5.95E-05 | 4.36E-01 | -- |
| rs263020    | 3  | 183507633 | C | G | YEATS2              | Imp | 0.46 | 6.01E-05 | 7.57E-01 | +- |
| rs12693835  | 2  | 199082923 | C | T | FLJ59788            | Imp | 0.12 | 6.08E-05 | 7.38E-01 | +- |
| rs17127787  | 14 | 55166115  | G | A | SAMD4               | Imp | 0.29 | 6.08E-05 | 8.77E-01 | +- |
| rs4532179   | 4  | 5993309   | G | A | CRMP1               | Imp | 0.20 | 6.12E-05 | 2.25E-01 | -- |
| rs10990208  | 9  | 99044629  | T | C | HSD17B3             | Imp | 0.44 | 6.13E-05 | 2.42E-01 | +- |
| rs262977    | 3  | 183455153 | G | A | YEATS2              | Imp | 0.46 | 6.18E-05 | 7.46E-01 | ++ |
| rs9373157   | 6  | 136261860 | A | G | PDE7B               | Imp | 0.38 | 6.20E-05 | 6.94E-01 | -- |
| rs9389346   | 6  | 136264516 | T | C | PDE7B               | Imp | 0.39 | 6.20E-05 | 6.92E-01 | -- |
| rs10433458  | 3  | 159726252 | T | C | FLJ39842            | Imp | 0.38 | 6.23E-05 | 5.23E-01 | -- |
| rs9852519   | 3  | 159720628 | T | C | FLJ39842            | Imp | 0.36 | 6.26E-05 | 5.81E-01 | -- |
| rs10465077  | 9  | 31526061  | G | C | DB022024            | Imp | 0.10 | 6.26E-05 | 4.84E-02 | +- |
| rs10970405  | 9  | 31532075  | G | C | DB022024            | Imp | 0.10 | 6.26E-05 | 4.85E-02 | +- |
| rs4879523   | 9  | 31534673  | G | A | DB022024            | Imp | 0.10 | 6.26E-05 | 3.61E-02 | +- |
| rs10970409  | 9  | 31535872  | A | G | DB022024            | Imp | 0.10 | 6.26E-05 | 4.86E-02 | +- |
| rs3096695   | 6  | 32069806  | G | C | TNXB                | Imp | 0.12 | 6.27E-05 | 6.32E-01 | -- |
| rs7210582   | 17 | 52352237  | T | C | NA                  | G   | 0.28 | 6.33E-05 | 5.78E-01 | +- |
| rs262969    | 3  | 183446783 | A | G | YEATS2              | Imp | 0.43 | 6.36E-05 | 7.50E-01 | -- |
| rs10820220  | 9  | 99045455  | C | T | HSD17B3             | Imp | 0.44 | 6.42E-05 | 2.43E-01 | +- |
| rs10970374  | 9  | 31470393  | T | C | DB022024            | G   | 0.10 | 6.43E-05 | 4.37E-02 | +- |
| rs4779129   | 15 | 79926115  | C | T | NA                  | Imp | 0.15 | 6.53E-05 | 9.81E-02 | ++ |
| rs6576811   | 1  | 86667673  | A | G | Near COL24A1        | Imp | 0.16 | 6.58E-05 | 4.83E-01 | +- |
| rs6420971   | 1  | 86667734  | G | A | Near COL24A1        | Imp | 0.16 | 6.58E-05 | 4.82E-01 | +- |
| rs1456569   | 2  | 199085248 | C | A | FLJ59788            | Imp | 0.12 | 6.58E-05 | 8.82E-01 | +- |
| rs4850833   | 2  | 199085661 | A | G | FLJ59788            | G   | 0.12 | 6.58E-05 | 8.75E-01 | +- |
| rs830167    | 3  | 183483609 | T | C | YEATS2              | Imp | 0.45 | 6.65E-05 | 7.89E-01 | +- |

Supp Table1

|                  |          |                  |          |          |              |            |             |                 |                 |           |
|------------------|----------|------------------|----------|----------|--------------|------------|-------------|-----------------|-----------------|-----------|
| rs262954         | 3        | 183484813        | A        | T        | YEATS2       | Imp        | 0.45        | 6.65E-05        | 7.83E-01        | +-        |
| rs11634773       | 15       | 23906530         | A        | G        | NA           | Imp        | 0.16        | 6.66E-05        | 1.55E-01        | +-        |
| rs1598660        | 2        | 199079806        | T        | C        | FLJ59788     | Imp        | 0.12        | 6.79E-05        | 7.28E-01        | +-        |
| rs421497         | 2        | 71409438         | A        | T        | PAIP2B       | Imp        | 0.36        | 6.79E-05        | 2.76E-01        | +-        |
| rs3796191        | 3        | 125872384        | G        | A        | ALDH1L1      | G          | 0.06        | 6.82E-05        | 1.44E-01        | +-        |
| rs4646708        | 3        | 125873973        | C        | T        | ALDH1L1      | Imp        | 0.06        | 6.82E-05        | 1.43E-01        | +-        |
| rs4273215        | 2        | 107110793        | G        | A        | AC108868.4   | Imp        | 0.34        | 6.84E-05        | 3.45E-01        | --        |
| rs8190512        | 9        | 99050100         | C        | A        | HSD17B3      | G          | 0.44        | 6.85E-05        | 2.49E-01        | +-        |
| chr4:599402      | 4        | 5994024          | T        | C        | CRMP1        | Imp        | 0.20        | 6.86E-05        | 1.71E-01        | ++        |
| rs16883842       | 6        | 20461405         | G        | A        | E2F3         | Imp        | 0.15        | 6.93E-05        | 9.32E-01        | +-        |
| rs3767864        | 1        | 212539342        | C        | T        | TMEM206      | Imp        | 0.39        | 6.95E-05        | 9.81E-01        | +-        |
| rs35228093       | 21       | 32664798         | T        | C        | TIAM1        | Imp        | 0.22        | 6.95E-05        | 8.40E-01        | ++        |
| rs1581696        | 7        | 53023773         | A        | C        | NA           | Imp        | 0.21        | 6.96E-05        | 2.77E-01        | +-        |
| rs10758064       | 9        | 31442191         | G        | A        | DB022024     | Imp        | 0.10        | 6.97E-05        | 5.29E-02        | +-        |
| rs4896190        | 6        | 136297337        | G        | T        | PDE7B        | Imp        | 0.38        | 7.01E-05        | 6.79E-01        | ++        |
| rs12620485       | 2        | 9774161          | T        | C        | BI547681     | Imp        | 0.07        | 7.03E-05        | 8.45E-02        | +-        |
| rs6715748        | 2        | 9774331          | G        | A        | BI547681     | G          | 0.07        | 7.03E-05        | 8.41E-02        | +-        |
| rs7567578        | 2        | 9775108          | C        | A        | BI547681     | Imp        | 0.07        | 7.03E-05        | 8.57E-02        | +-        |
| rs4669402        | 2        | 9779413          | C        | G        | BI547681     | Imp        | 0.07        | 7.03E-05        | 9.29E-02        | +-        |
| rs11154836       | 6        | 136286230        | G        | T        | PDE7B        | Imp        | 0.39        | 7.05E-05        | 6.04E-01        | ++        |
| rs7182022        | 15       | 45069742         | T        | C        | LOC100419583 | Imp        | 0.10        | 7.10E-05        | 9.76E-01        | --        |
| rs55984975       | 17       | 73382020         | C        | T        | GRB2         | Imp        | 0.10        | 7.12E-05        | 5.69E-01        | +-        |
| chr2:107106      | 2        | 107106972        | C        | T        | AC108868.4   | Imp        | 0.35        | 7.13E-05        | 3.64E-01        | --        |
| rs9350250        | 6        | 20467228         | T        | C        | E2F3         | Imp        | 0.15        | 7.14E-05        | 9.36E-01        | +-        |
| rs12468642       | 2        | 199077727        | G        | T        | FLJ59788     | Imp        | 0.12        | 7.21E-05        | 9.60E-01        | +-        |
| rs6754329        | 2        | 199081995        | A        | C        | FLJ59788     | Imp        | 0.12        | 7.21E-05        | 7.30E-01        | +-        |
| rs12686518       | 9        | 99047755         | T        | C        | HSD17B3      | Imp        | 0.44        | 7.25E-05        | 2.57E-01        | +-        |
| rs2147253        | 9        | 99048003         | A        | G        | HSD17B3      | Imp        | 0.44        | 7.25E-05        | 2.46E-01        | +-        |
| rs10820228       | 9        | 99048342         | A        | G        | HSD17B3      | Imp        | 0.44        | 7.25E-05        | 2.46E-01        | +-        |
| rs55706054       | 7        | 95466089         | C        | G        | DYNC111      | Imp        | 0.09        | 7.25E-05        | 6.76E-01        | ++        |
| rs56680341       | 7        | 95466311         | T        | C        | DYNC111      | Imp        | 0.09        | 7.25E-05        | 6.71E-01        | ++        |
| rs17622436       | 1        | 75589581         | C        | A        | BC036630     | G          | 0.11        | 7.31E-05        | 3.53E-01        | +-        |
| rs62332692       | 4        | 169996544        | T        | C        | NA           | Imp        | 0.20        | 7.34E-05        | 3.35E-01        | --        |
| rs7225542        | 17       | 73364602         | A        | C        | GRB2         | Imp        | 0.10        | 7.34E-05        | 5.46E-01        | +-        |
| rs6441286        | 3        | 159728878        | G        | T        | FLJ39842     | G          | 0.38        | 7.36E-05        | 5.25E-01        | ++        |
| rs13150221       | 4        | 169996393        | C        | A        | NA           | Imp        | 0.19        | 7.39E-05        | 3.17E-01        | ++        |
| rs8069641        | 17       | 62058446         | A        | G        | NA           | Imp        | 0.34        | 7.42E-05        | 3.16E-01        | ++        |
| rs1430994        | 4        | 165092629        | C        | T        | MARCH1       | Imp        | 0.50        | 7.45E-05        | 9.64E-01        | +-        |
| rs8081059        | 17       | 71068719         | C        | A        | SLC39A11     | G          | 0.18        | 7.50E-05        | 3.66E-01        | ++        |
| rs13436911       | 5        | 160330798        | A        | G        | NA           | Imp        | 0.44        | 7.50E-05        | 3.29E-01        | ++        |
| rs3130342        | 6        | 32080146         | A        | C        | NA           | G          | 0.13        | 7.52E-05        | 4.75E-01        | ++        |
| rs13065738       | 3        | 159720559        | T        | G        | FLJ39842     | Imp        | 0.36        | 7.53E-05        | 5.97E-01        | --        |
| rs4743685        | 9        | 99043822         | T        | G        | HSD17B3      | Imp        | 0.44        | 7.54E-05        | 2.41E-01        | +-        |
| rs6540736        | 1        | 212481837        | G        | A        | PPP2R5A      | Imp        | 0.41        | 7.55E-05        | 9.91E-01        | --        |
| chr3:159735      | 3        | 159735441        | A        | G        | FLJ39842     | Imp        | 0.39        | 7.60E-05        | 6.75E-01        | --        |
| chr17:73382      | 17       | 73382756         | T        | C        | GRB2         | Imp        | 0.06        | 7.65E-05        | 1.90E-01        | +-        |
| rs4362555        | 2        | 107102418        | T        | G        | AC108868.4   | G          | 0.35        | 7.68E-05        | 3.67E-01        | ++        |
| <b>rs6842017</b> | <b>4</b> | <b>5998417</b>   | <b>T</b> | <b>A</b> | <b>NA</b>    | <b>Imp</b> | <b>0.24</b> | <b>7.68E-05</b> | <b>7.55E-02</b> | <b>--</b> |
| rs1507290        | 1        | 86684713         | G        | A        | Near COL24A1 | G          | 0.15        | 7.70E-05        | 3.95E-01        | +-        |
| rs594083         | 19       | 50751088         | T        | C        | MYH14        | Imp        | 0.18        | 7.72E-05        | 9.05E-01        | ++        |
| rs9385749        | 6        | 136261114        | A        | G        | PDE7B        | Imp        | 0.38        | 7.74E-05        | 6.99E-01        | --        |
| rs615035         | 19       | 50746487         | A        | G        | MYH14        | Imp        | 0.18        | 7.78E-05        | 9.36E-01        | ++        |
| rs7074380        | 10       | 43466121         | A        | T        | NA           | Imp        | 0.07        | 7.80E-05        | 2.31E-01        | +-        |
| rs4656140        | 1        | 86706236         | G        | T        | Near COL24A1 | Imp        | 0.12        | 7.83E-05        | 4.89E-01        | +-        |
| rs1598661        | 2        | 199079846        | G        | A        | FLJ59788     | Imp        | 0.12        | 7.84E-05        | 7.46E-01        | +-        |
| <b>rs7819358</b> | <b>8</b> | <b>107529963</b> | <b>G</b> | <b>A</b> | <b>OXR1</b>  | <b>G</b>   | <b>0.29</b> | <b>7.90E-05</b> | <b>6.72E-02</b> | <b>++</b> |
| chr19:50294      | 19       | 50294367         | G        | A        | NA           | Imp        | 0.19        | 7.90E-05        | 3.34E-01        | --        |
| rs1418340        | 6        | 136259596        | G        | C        | PDE7B        | Imp        | 0.38        | 7.94E-05        | 7.16E-01        | ++        |
| rs7285742        | 22       | 36980102         | A        | G        | CACNG2       | G          | 0.36        | 7.98E-05        | 9.67E-01        | --        |
| rs677639         | 19       | 50749851         | T        | C        | MYH14        | Imp        | 0.18        | 8.00E-05        | 9.42E-01        | ++        |
| rs594129         | 19       | 50751048         | T        | C        | MYH14        | Imp        | 0.18        | 8.00E-05        | 9.35E-01        | ++        |
| rs661858         | 19       | 50751096         | A        | G        | MYH14        | Imp        | 0.18        | 8.00E-05        | 9.32E-01        | ++        |

Supp Table1

|             |    |           |   |   |            |     |      |          |          |    |
|-------------|----|-----------|---|---|------------|-----|------|----------|----------|----|
| rs650262    | 19 | 50751361  | G | A | MYH14      | G   | 0.18 | 8.00E-05 | 9.32E-01 | -- |
| rs1418341   | 6  | 136260450 | C | T | PDE7B      | Imp | 0.38 | 8.04E-05 | 7.05E-01 | ++ |
| rs9619616   | 22 | 36969599  | A | G | CACNG2     | Imp | 0.31 | 8.07E-05 | 8.28E-01 | -- |
| rs61843437  | 10 | 43434032  | T | C | NA         | Imp | 0.07 | 8.12E-05 | 2.31E-01 | +- |
| rs10813599  | 9  | 31472366  | A | T | DB022024   | Imp | 0.11 | 8.20E-05 | 4.48E-02 | ++ |
| rs10813600  | 9  | 31472488  | A | G | DB022024   | Imp | 0.11 | 8.20E-05 | 4.52E-02 | ++ |
| rs10813601  | 9  | 31472633  | T | C | DB022024   | G   | 0.11 | 8.20E-05 | 4.28E-02 | ++ |
| rs883799    | 6  | 136262043 | T | C | PDE7B      | Imp | 0.38 | 8.23E-05 | 6.84E-01 | -- |
| rs7097557   | 10 | 43466246  | T | C | NA         | Imp | 0.07 | 8.30E-05 | 2.39E-01 | +- |
| rs10798587  | 1  | 177934044 | C | T | SEC16B     | Imp | 0.45 | 8.38E-05 | 3.61E-01 | -- |
| rs12135725  | 1  | 177934467 | C | T | SEC16B     | Imp | 0.45 | 8.38E-05 | 3.67E-01 | -- |
| rs6679120   | 1  | 177934591 | C | T | SEC16B     | Imp | 0.45 | 8.38E-05 | 3.67E-01 | -- |
| rs9373156   | 6  | 136259383 | A | G | PDE7B      | Imp | 0.38 | 8.42E-05 | 7.19E-01 | -- |
| rs2740353   | 17 | 640256    | G | A | FAM57A     | Imp | 0.46 | 8.50E-05 | 2.81E-01 | ++ |
| rs11501342  | 11 | 102227173 | C | T | BIRC2      | Imp | 0.07 | 8.52E-05 | 3.43E-01 | ++ |
| rs4679868   | 3  | 159724154 | A | G | FLJ39842   | Imp | 0.38 | 8.52E-05 | 5.56E-01 | -- |
| rs6433416   | 2  | 174342311 | C | T | AC073465.2 | Imp | 0.09 | 8.52E-05 | 5.58E-01 | ++ |
| rs7594926   | 2  | 174342575 | C | T | AC073465.2 | Imp | 0.09 | 8.52E-05 | 5.58E-01 | ++ |
| rs4918193   | 10 | 107794480 | A | G | NA         | Imp | 0.46 | 8.54E-05 | 6.22E-01 | ++ |
| rs10798586  | 1  | 177933829 | C | A | SEC16B     | Imp | 0.47 | 8.59E-05 | 5.06E-01 | -- |
| rs4075418   | 6  | 136305964 | A | G | PDE7B      | Imp | 0.38 | 8.72E-05 | 7.02E-01 | -- |
| rs12747656  | 1  | 177931508 | A | C | SEC16B     | G   | 0.45 | 8.75E-05 | 3.76E-01 | ++ |
| rs830169    | 3  | 183476020 | G | C | YEATS2     | Imp | 0.44 | 8.76E-05 | 8.36E-01 | ++ |
| rs262990    | 3  | 183480195 | C | T | YEATS2     | Imp | 0.44 | 8.77E-05 | 8.53E-01 | ++ |
| rs1964849   | 17 | 641552    | T | C | FAM57A     | Imp | 0.46 | 8.78E-05 | 3.22E-01 | +- |
| rs61942904  | 12 | 132246747 | T | C | SFRS8      | Imp | 0.07 | 8.83E-05 | 6.32E-01 | ++ |
| rs3111532   | 5  | 179641662 | C | T | NA         | G   | 0.49 | 8.85E-05 | 5.70E-01 | -- |
| rs10853340  | 18 | 6906508   | C | G | ARHGAP28   | Imp | 0.12 | 8.86E-05 | 2.11E-02 | ++ |
| rs10913473  | 1  | 177932363 | C | T | SEC16B     | Imp | 0.44 | 8.89E-05 | 3.41E-01 | -- |
| rs10970386  | 9  | 31499218  | G | A | DB022024   | Imp | 0.10 | 8.90E-05 | 4.03E-02 | +- |
| rs10813605  | 9  | 31500931  | T | A | DB022024   | Imp | 0.10 | 8.90E-05 | 4.07E-02 | +- |
| rs10970388  | 9  | 31507143  | C | T | DB022024   | Imp | 0.10 | 8.90E-05 | 4.07E-02 | +- |
| chr9:315074 | 9  | 31507423  | A | G | DB022024   | Imp | 0.10 | 8.90E-05 | 4.06E-02 | ++ |
| rs10970391  | 9  | 31511681  | T | C | DB022024   | Imp | 0.10 | 8.90E-05 | 4.07E-02 | ++ |
| rs10813606  | 9  | 31512376  | T | G | DB022024   | Imp | 0.10 | 8.90E-05 | 4.07E-02 | ++ |
| rs10970394  | 9  | 31514029  | A | T | DB022024   | Imp | 0.10 | 8.90E-05 | 4.09E-02 | ++ |
| rs10970395  | 9  | 31515688  | A | G | DB022024   | Imp | 0.10 | 8.90E-05 | 4.67E-02 | ++ |
| rs10813608  | 9  | 31518778  | A | C | DB022024   | Imp | 0.10 | 8.90E-05 | 4.78E-02 | ++ |
| rs1475562   | 9  | 31520947  | A | G | DB022024   | Imp | 0.10 | 8.90E-05 | 4.92E-02 | ++ |
| rs10465075  | 9  | 31523945  | A | G | DB022024   | Imp | 0.10 | 8.90E-05 | 4.87E-02 | ++ |
| rs13223972  | 7  | 95461693  | C | G | DYNC11     | Imp | 0.09 | 8.95E-05 | 6.60E-01 | ++ |
| rs3813651   | 1  | 177933443 | A | G | SEC16B     | Imp | 0.45 | 8.95E-05 | 3.73E-01 | ++ |
| rs2618971   | 7  | 95431640  | C | T | DYNC11     | G   | 0.10 | 8.95E-05 | 9.06E-01 | -- |
| rs58412327  | 6  | 20456691  | A | G | E2F3       | Imp | 0.13 | 8.97E-05 | 6.23E-01 | -- |
| rs954502    | 1  | 177935203 | G | A | SEC16B     | Imp | 0.45 | 9.02E-05 | 3.11E-01 | -- |
| rs10813576  | 9  | 31411376  | C | T | DB022024   | Imp | 0.08 | 9.04E-05 | 3.11E-02 | +- |
| rs3799632   | 6  | 166958388 | G | T | RPS6KA2    | Imp | 0.09 | 9.05E-05 | 8.92E-02 | +- |
| rs2706886   | 7  | 95428894  | T | G | DYNC11     | Imp | 0.09 | 9.06E-05 | 7.34E-01 | ++ |
| rs2629051   | 7  | 95430277  | C | A | DYNC11     | Imp | 0.09 | 9.06E-05 | 7.49E-01 | -- |
| rs34415911  | 7  | 95433240  | T | C | DYNC11     | Imp | 0.09 | 9.06E-05 | 7.35E-01 | ++ |
| rs2045981   | 7  | 95437146  | G | A | DYNC11     | Imp | 0.09 | 9.06E-05 | 7.24E-01 | -- |
| rs17167184  | 7  | 95441451  | C | T | DYNC11     | G   | 0.09 | 9.06E-05 | 7.35E-01 | -- |
| rs13244429  | 7  | 95447374  | A | G | DYNC11     | Imp | 0.09 | 9.06E-05 | 7.35E-01 | ++ |
| rs60012156  | 7  | 95450440  | T | C | DYNC11     | Imp | 0.09 | 9.06E-05 | 6.72E-01 | ++ |
| rs4729208   | 7  | 95450444  | A | G | DYNC11     | Imp | 0.09 | 9.06E-05 | 6.73E-01 | ++ |
| rs4729209   | 7  | 95450842  | T | A | DYNC11     | Imp | 0.09 | 9.06E-05 | 6.49E-01 | -- |
| chr7:954510 | 7  | 95451042  | A | G | DYNC11     | Imp | 0.09 | 9.06E-05 | 6.73E-01 | ++ |
| rs7040214   | 9  | 100978662 | T | C | TBC1D2     | Imp | 0.06 | 9.07E-05 | 3.73E-01 | ++ |
| rs11154835  | 6  | 136284476 | A | G | PDE7B      | Imp | 0.39 | 9.08E-05 | 6.79E-01 | -- |
| rs9348429   | 6  | 20437765  | C | T | E2F3       | Imp | 0.13 | 9.12E-05 | 7.15E-01 | ++ |
| rs3779484   | 7  | 95476671  | A | T | DYNC11     | Imp | 0.10 | 9.15E-05 | 7.75E-01 | ++ |
| chr7:954790 | 7  | 95479045  | T | C | DYNC11     | Imp | 0.10 | 9.15E-05 | 7.75E-01 | ++ |

Supp Table1

|                  |           |                 |          |          |                    |            |             |                 |                 |           |
|------------------|-----------|-----------------|----------|----------|--------------------|------------|-------------|-----------------|-----------------|-----------|
| rs60234546       | 7         | 95481078        | A        | G        | DYNC111            | Imp        | 0.10        | 9.15E-05        | 8.08E-01        | ++        |
| rs56120023       | 14        | 55155476        | C        | T        | SAMD4A             | Imp        | 0.28        | 9.17E-05        | 9.12E-01        | --        |
| rs12190806       | 6         | 136284331       | C        | T        | PDE7B              | Imp        | 0.39        | 9.26E-05        | 5.93E-01        | ++        |
| rs10813574       | 9         | 31409820        | G        | T        | DB022024           | Imp        | 0.08        | 9.31E-05        | 2.20E-02        | +-        |
| rs61942912       | 12        | 132257356       | A        | G        | SFRS8              | Imp        | 0.07        | 9.33E-05        | 6.44E-01        | ++        |
| rs262993         | 3         | 183476685       | A        | G        | YEATS2             | G          | 0.44        | 9.38E-05        | 8.39E-01        | +-        |
| rs262992         | 3         | 183477126       | G        | A        | YEATS2             | G          | 0.44        | 9.38E-05        | 8.05E-01        | +-        |
| chr10:43430      | 10        | 43430835        | C        | A        | NA                 | Imp        | 0.07        | 9.41E-05        | 3.66E-01        | +-        |
| rs4646745        | 3         | 125827399       | A        | G        | ALDH1L1            | G          | 0.21        | 9.42E-05        | 8.27E-01        | +-        |
| rs2236297        | 14        | 55158448        | A        | G        | SAMD4A             | Imp        | 0.28        | 9.44E-05        | 9.43E-01        | ++        |
| rs10457646       | 6         | 136285328       | A        | G        | PDE7B              | Imp        | 0.38        | 9.45E-05        | 8.33E-01        | --        |
| rs9389350        | 6         | 136284311       | T        | C        | PDE7B              | Imp        | 0.38        | 9.46E-05        | 8.11E-01        | --        |
| rs4896188        | 6         | 136286875       | T        | G        | PDE7B              | Imp        | 0.38        | 9.46E-05        | 8.34E-01        | --        |
| rs1342241        | 6         | 136270670       | G        | A        | PDE7B              | Imp        | 0.39        | 9.50E-05        | 5.73E-01        | ++        |
| rs10970380       | 9         | 31487133        | G        | C        | DB022024           | Imp        | 0.10        | 9.51E-05        | 3.62E-02        | +-        |
| rs10970381       | 9         | 31487145        | T        | C        | DB022024           | Imp        | 0.10        | 9.51E-05        | 3.63E-02        | +-        |
| rs10970382       | 9         | 31487291        | T        | C        | DB022024           | Imp        | 0.10        | 9.51E-05        | 3.62E-02        | +-        |
| rs16883824       | 6         | 20455564        | T        | C        | E2F3               | Imp        | 0.13        | 9.53E-05        | 6.79E-01        | --        |
| rs954503         | 1         | 177935443       | T        | C        | SEC16B             | G          | 0.45        | 9.55E-05        | 3.74E-01        | ++        |
| rs2135807        | 1         | 86669298        | C        | T        | Near COL24A1       | Imp        | 0.18        | 9.55E-05        | 4.90E-01        | +-        |
| rs9376172        | 6         | 136332358       | C        | T        | PDE7B              | Imp        | 0.37        | 9.56E-05        | 7.63E-01        | ++        |
| rs61843432       | 10        | 43429798        | A        | G        | NA                 | Imp        | 0.07        | 9.56E-05        | 3.43E-01        | +-        |
| rs7211461        | 17        | 71063606        | T        | C        | SLC39A11           | Imp        | 0.18        | 9.56E-05        | 3.41E-01        | --        |
| rs2517521        | 6         | 31027336        | A        | G        | NA                 | Imp        | 0.13        | 9.58E-05        | 8.04E-01        | ++        |
| rs262991         | 3         | 183477665       | G        | A        | YEATS2             | Imp        | 0.44        | 9.64E-05        | 8.14E-01        | +-        |
| rs2740351        | 17        | 643426          | G        | A        | FAM57A             | G          | 0.46        | 9.66E-05        | 3.09E-01        | +-        |
| rs9389347        | 6         | 136265289       | A        | G        | PDE7B              | Imp        | 0.39        | 9.70E-05        | 6.83E-01        | --        |
| chr10:11848      | 10        | 11848217        | A        | T        | NA                 | Imp        | 0.08        | 9.71E-05        | 4.17E-01        | +-        |
| chr10:11850      | 10        | 11850534        | T        | C        | NA                 | Imp        | 0.08        | 9.71E-05        | 4.16E-01        | +-        |
| rs16792          | 10        | 11852678        | C        | G        | NA                 | Imp        | 0.08        | 9.71E-05        | 4.14E-01        | +-        |
| rs56232280       | 10        | 11852947        | G        | C        | NA                 | Imp        | 0.08        | 9.71E-05        | 4.10E-01        | +-        |
| rs974673         | 14        | 34480514        | T        | C        | NA                 | G          | 0.14        | 9.71E-05        | 2.70E-01        | ++        |
| rs4729210        | 7         | 95455848        | A        | G        | DYNC111            | Imp        | 0.09        | 9.73E-05        | 6.56E-01        | ++        |
| rs34159725       | 7         | 95456468        | T        | C        | DYNC111            | Imp        | 0.09        | 9.73E-05        | 6.59E-01        | ++        |
| rs41278815       | 7         | 95457198        | T        | C        | DYNC111            | Imp        | 0.09        | 9.73E-05        | 6.71E-01        | ++        |
| rs2876318        | 6         | 136266160       | G        | A        | PDE7B              | Imp        | 0.39        | 9.74E-05        | 6.39E-01        | ++        |
| rs6569399        | 6         | 125143279       | A        | G        | NKAIN2             | G          | 0.11        | 9.75E-05        | 9.96E-01        | +-        |
| <b>rs1973345</b> | <b>16</b> | <b>82271777</b> | <b>C</b> | <b>T</b> | <b>3' MPHOSPH6</b> | <b>Imp</b> | <b>0.15</b> | <b>9.81E-05</b> | <b>5.19E-02</b> | <b>++</b> |
| <b>rs1032339</b> | <b>16</b> | <b>82271810</b> | <b>G</b> | <b>A</b> | <b>3' MPHOSPH6</b> | <b>Imp</b> | <b>0.15</b> | <b>9.81E-05</b> | <b>5.26E-02</b> | <b>++</b> |
| <b>rs1011433</b> | <b>16</b> | <b>82273549</b> | <b>G</b> | <b>A</b> | <b>3' MPHOSPH6</b> | <b>Imp</b> | <b>0.15</b> | <b>9.81E-05</b> | <b>4.17E-02</b> | <b>++</b> |
| rs12212922       | 6         | 87298528        | A        | G        | NA                 | G          | 0.37        | 9.83E-05        | 3.01E-01        | +-        |
| rs10813602       | 9         | 31472799        | A        | G        | DB022024           | Imp        | 0.10        | 9.84E-05        | 3.58E-02        | +-        |
| rs2447720        | 9         | 31472867        | G        | A        | DB022024           | Imp        | 0.10        | 9.84E-05        | 3.32E-02        | +-        |
| rs10990251       | 9         | 99051111        | G        | C        | HSD17B3            | Imp        | 0.44        | 9.85E-05        | 2.77E-01        | +-        |
| rs11887934       | 2         | 111451816       | C        | T        | Near DQ588931      | G          | 0.34        | 9.85E-05        | 8.06E-01        | ++        |
| chr10:11852      | 10        | 11852187        | T        | C        | NA                 | Imp        | 0.08        | 9.89E-05        | 4.12E-01        | +-        |
| rs11535476       | 9         | 31516821        | A        | G        | DB022024           | Imp        | 0.10        | 9.90E-05        | 4.73E-02        | +-        |
| rs2910439        | 19        | 8570283         | G        | T        | NA                 | Imp        | 0.48        | 9.92E-05        | 8.01E-01        | ++        |
| rs262994         | 3         | 183475359       | T        | C        | YEATS2             | Imp        | 0.44        | 9.94E-05        | 8.30E-01        | +-        |
| rs4507140        | 2         | 40248314        | T        | C        | LOC100128590       | Imp        | 0.15        | 9.99E-05        | 7.61E-01        | +-        |
| rs6731048        | 2         | 40248799        | G        | A        | LOC100128590       | Imp        | 0.15        | 9.99E-05        | 7.72E-01        | +-        |

<sup>a</sup> Minor allele frequency estimated on founders; <sup>b</sup> direction of effect in COGA and SAGE datasets; Values in bold characters represent trend for association in SAGE dataset (P < 0.08)
