# Supplementary material
Source: PubMed Central journal article supplement (PMC3776011)
Supplement: NIHMS490008-supplement-439_2013_1318_MOESM3_ESM.pdf [file NIHMS490008-supplement-439_2013_1318_MOESM3_ESM.pdf]

## Supplementary Table 2

Summary of results for the genotyped and imputed SNPs in SAGE and COGA datasets sorted in ascending order on SAGE P values ( $P < 1 \times 10^{-4}$ )

| SNP              | CHR       | BP               | A1       | A2       | Gene         | Geno/Imp   | MAF <sup>a</sup> | P_SAGE          | P_coga          | Dir <sup>b</sup> |
|------------------|-----------|------------------|----------|----------|--------------|------------|------------------|-----------------|-----------------|------------------|
| <b>rs1229984</b> | <b>4</b>  | <b>100239319</b> | <b>T</b> | <b>C</b> | <b>ADH1B</b> | <b>G</b>   | <b>0.035</b>     | <b>4.32E-07</b> | <b>1.20E-02</b> | <b>--</b>        |
| rs67666182       | 8         | 82772037         | G        | A        | Near SNX16   | Imp        | 0.32             | 7.11E-07        | 8.35E-01        | ++               |
| rs2400540        | 8         | 82763948         | C        | A        | Near SNX16   | Imp        | 0.32             | 8.11E-07        | 8.21E-01        | ++               |
| rs28390260       | 8         | 82769175         | T        | A        | Near SNX16   | Imp        | 0.33             | 8.37E-07        | 8.35E-01        | ++               |
| rs12676336       | 8         | 82771008         | T        | C        | Near SNX16   | Imp        | 0.32             | 8.42E-07        | 8.57E-01        | --               |
| rs7839178        | 8         | 82763479         | G        | A        | Near SNX16   | Imp        | 0.33             | 9.17E-07        | 8.21E-01        | ++               |
| chr8:82754460    | 8         | 82754460         | G        | C        | Near SNX16   | Imp        | 0.32             | 1.19E-06        | 7.37E-01        | ++               |
| rs4239611        | 19        | 15727292         | T        | G        | CYP4F8       | Imp        | 0.34             | 1.38E-06        | 6.31E-01        | -+               |
| rs4646523        | 19        | 15726487         | G        | T        | CYP4F8       | Imp        | 0.34             | 1.44E-06        | 6.19E-01        | +-               |
| rs4808327        | 19        | 15727340         | G        | C        | CYP4F8       | Imp        | 0.33             | 1.51E-06        | 6.32E-01        | +-               |
| rs4739627        | 8         | 82734657         | A        | G        | SNX16        | Imp        | 0.33             | 1.53E-06        | 6.60E-01        | --               |
| rs6415652        | 8         | 82702257         | G        | A        | Near FABP5   | Imp        | 0.34             | 1.60E-06        | 6.80E-01        | ++               |
| rs62202398       | 20        | 46801224         | A        | G        | NA           | Imp        | 0.07             | 1.69E-06        | 3.81E-01        | --               |
| rs10083616       | 15        | 27609171         | A        | G        | NA           | Imp        | 0.25             | 1.71E-06        | 9.95E-01        | -+               |
| rs6415653        | 8         | 82702536         | A        | G        | Near FABP5   | Imp        | 0.34             | 1.72E-06        | 6.72E-01        | --               |
| rs7846521        | 8         | 82718107         | A        | G        | SNX16        | Imp        | 0.33             | 1.72E-06        | 6.60E-01        | --               |
| rs1451995        | 8         | 82746123         | C        | G        | SNX16        | Imp        | 0.33             | 1.75E-06        | 6.60E-01        | --               |
| rs10958045       | 8         | 82722994         | T        | C        | SNX16        | G          | 0.33             | 1.79E-06        | 6.60E-01        | --               |
| rs6473311        | 8         | 82726682         | G        | A        | SNX16        | Imp        | 0.33             | 1.79E-06        | 6.60E-01        | ++               |
| rs12544174       | 8         | 82731477         | G        | A        | SNX16        | Imp        | 0.33             | 1.79E-06        | 6.60E-01        | ++               |
| rs1054078        | 8         | 82712153         | A        | G        | SNX16        | Imp        | 0.33             | 1.79E-06        | 6.23E-01        | --               |
| rs7825180        | 8         | 82723991         | T        | A        | SNX16        | Imp        | 0.33             | 1.80E-06        | 6.37E-01        | ++               |
| rs9707971        | 15        | 27608150         | G        | A        | NA           | Imp        | 0.25             | 1.83E-06        | 9.84E-01        | +-               |
| rs13255262       | 8         | 82728024         | T        | G        | SNX16        | Imp        | 0.33             | 1.88E-06        | 6.60E-01        | --               |
| rs10083606       | 15        | 27608761         | A        | G        | NA           | Imp        | 0.24             | 1.90E-06        | 9.77E-01        | -+               |
| rs7835342        | 8         | 82698092         | A        | G        | Near FABP5   | Imp        | 0.34             | 1.92E-06        | 6.22E-01        | --               |
| rs7834555        | 8         | 82697625         | A        | G        | Near FABP5   | G          | 0.34             | 1.98E-06        | 6.22E-01        | --               |
| rs60630422       | 20        | 46802989         | A        | C        | NA           | Imp        | 0.07             | 2.00E-06        | 6.72E-01        | --               |
| rs6473310        | 8         | 82707981         | A        | G        | Near SNX16   | Imp        | 0.33             | 2.19E-06        | 6.20E-01        | --               |
| rs2400474        | 8         | 82706439         | A        | G        | Near SNX16   | Imp        | 0.33             | 2.21E-06        | 4.99E-01        | --               |
| rs28668284       | 15        | 27609193         | A        | G        | NA           | Imp        | 0.25             | 2.32E-06        | 9.80E-01        | --               |
| rs6473309        | 8         | 82707880         | A        | G        | Near SNX16   | Imp        | 0.33             | 2.32E-06        | 6.20E-01        | --               |
| rs6473308        | 8         | 82707708         | G        | A        | Near SNX16   | Imp        | 0.33             | 2.38E-06        | 6.20E-01        | ++               |
| rs10091077       | 8         | 82705464         | A        | G        | Near FABP5   | Imp        | 0.33             | 2.53E-06        | 7.14E-01        | --               |
| rs7834483        | 8         | 82704828         | A        | G        | Near FABP5   | Imp        | 0.33             | 2.71E-06        | 7.16E-01        | --               |
| rs1668305        | 15        | 87798142         | G        | T        | Near AGBL1   | Imp        | 0.42             | 3.73E-06        | 7.73E-01        | --               |
| rs9707922        | 15        | 27608057         | T        | C        | NA           | Imp        | 0.24             | 3.96E-06        | 9.57E-01        | -+               |
| rs10083549       | 15        | 27606723         | T        | C        | NA           | G          | 0.24             | 4.47E-06        | 9.22E-01        | -+               |
| rs12672606       | 7         | 131133690        | C        | G        | MKLN1        | Imp        | 0.45             | 4.87E-06        | 9.29E-01        | +-               |
| rs10447541       | 7         | 2301578          | G        | T        | SNX8         | G          | 0.38             | 5.48E-06        | 6.44E-01        | -+               |
| rs10447540       | 7         | 2301484          | G        | A        | SNX8         | Imp        | 0.38             | 5.52E-06        | 6.44E-01        | -+               |
| rs12537790       | 7         | 2299900          | A        | T        | SNX8         | Imp        | 0.38             | 5.66E-06        | 6.63E-01        | +-               |
| rs10083554       | 15        | 27606999         | T        | C        | NA           | Imp        | 0.24             | 5.69E-06        | 9.38E-01        | -+               |
| rs7144649        | 14        | 57822216         | G        | A        | NA           | G          | 0.23             | 5.76E-06        | 1.15E-01        | ++               |
| rs9744111        | 15        | 27607374         | A        | G        | NA           | Imp        | 0.24             | 5.93E-06        | 9.28E-01        | -+               |
| <b>rs4758317</b> | <b>11</b> | <b>8250811</b>   | <b>C</b> | <b>A</b> | <b>LMO1</b>  | <b>Imp</b> | <b>0.45</b>      | <b>5.97E-06</b> | <b>2.85E-02</b> | <b>--</b>        |
| rs9672748        | 15        | 27606287         | G        | T        | NA           | Imp        | 0.24             | 6.12E-06        | 9.57E-01        | +-               |
| rs9672931        | 15        | 27606401         | A        | G        | NA           | Imp        | 0.24             | 6.14E-06        | 9.57E-01        | -+               |
| rs7995266        | 13        | 72822770         | C        | T        | NA           | G          | 0.11             | 6.15E-06        | 1.51E-02        | +-               |
| rs9672527        | 15        | 27605983         | A        | T        | NA           | Imp        | 0.24             | 6.25E-06        | 9.57E-01        | -+               |
| rs59815503       | 6         | 5747198          | G        | A        | FARS2        | Imp        | 0.12             | 6.45E-06        | 2.74E-01        | +-               |
| rs9672371        | 15        | 27604427         | T        | G        | NA           | Imp        | 0.24             | 6.52E-06        | 9.78E-01        | --               |
| rs17141229       | 6         | 5748088          | T        | C        | FARS2        | Imp        | 0.12             | 6.58E-06        | 2.74E-01        | -+               |
| rs10477601       | 5         | 119783561        | A        | G        | NA           | Imp        | 0.09             | 6.66E-06        | 4.45E-01        | ++               |

Supp Table2

|                   |          |                 |          |          |             |            |             |                 |                 |    |
|-------------------|----------|-----------------|----------|----------|-------------|------------|-------------|-----------------|-----------------|----|
| rs12101405        | 15       | 87811189        | G        | C        | Near AGBL1  | Imp        | 0.26        | 6.96E-06        | 5.55E-01        | ++ |
| rs13171079        | 5        | 119783096       | C        | A        | NA          | Imp        | 0.09        | 7.39E-06        | 4.46E-01        | -- |
| rs9330519         | 15       | 27603853        | G        | A        | NA          | Imp        | 0.24        | 7.49E-06        | 9.70E-01        | ++ |
| rs13171094        | 5        | 119783146       | T        | A        | NA          | Imp        | 0.09        | 7.64E-06        | 2.76E-01        | -- |
| rs1491579         | 15       | 84178679        | T        | C        | SH3GL3      | G          | 0.44        | 7.68E-06        | 2.37E-01        | ++ |
| rs1606767         | 4        | 138139382       | C        | T        | NA          | Imp        | 0.29        | 8.22E-06        | 6.32E-01        | -- |
| rs992700          | 4        | 138133304       | G        | A        | LOC729578   | Imp        | 0.29        | 8.29E-06        | 5.23E-01        | -- |
| chr4:138134142    | 4        | 138134142       | A        | T        | LOC729578   | Imp        | 0.29        | 8.29E-06        | 5.49E-01        | ++ |
| rs2712208         | 7        | 107343762       | G        | C        | SLC26A4     | Imp        | 0.21        | 8.58E-06        | 1.90E-01        | ++ |
| rs7747725         | 6        | 5761789         | C        | G        | FARS2       | Imp        | 0.12        | 8.78E-06        | 1.44E-01        | -+ |
| chr15:37885889    | 15       | 37885889        | A        | T        | NA          | Imp        | 0.22        | 8.79E-06        | 5.32E-01        | ++ |
| rs6918838         | 6        | 3286134         | G        | A        | SLC22A23    | Imp        | 0.08        | 8.89E-06        | 9.73E-01        | ++ |
| rs7740019         | 6        | 5744992         | A        | G        | FARS2       | G          | 0.12        | 8.93E-06        | 2.31E-01        | -+ |
| chr7:131132940    | 7        | 131132940       | C        | T        | MKLN1       | Imp        | 0.45        | 8.96E-06        | 8.42E-01        | -- |
| rs2270052         | 7        | 2291399         | A        | G        | NA          | G          | 0.37        | 9.06E-06        | 5.31E-01        | -+ |
| rs2188561         | 7        | 107336058       | A        | C        | SLC26A4     | Imp        | 0.21        | 9.17E-06        | 1.47E-01        | -- |
| rs7748744         | 6        | 5758827         | C        | G        | FARS2       | Imp        | 0.12        | 9.26E-06        | 1.65E-01        | -+ |
| rs3794988         | 19       | 15723891        | G        | A        | NA          | G          | 0.26        | 9.74E-06        | 1.61E-01        | -+ |
| rs12534131        | 7        | 2294123         | T        | C        | SNX8        | G          | 0.36        | 9.80E-06        | 5.03E-01        | -+ |
| rs4267321         | 16       | 7170088         | G        | A        | A2BP1       | Imp        | 0.13        | 9.81E-06        | 4.61E-01        | ++ |
| rs6920448         | 6        | 5755626         | C        | T        | FARS2       | Imp        | 0.12        | 9.95E-06        | 2.46E-01        | -+ |
| rs13228664        | 7        | 131132340       | G        | A        | MKLN1       | G          | 0.45        | 1.00E-05        | 8.04E-01        | -- |
| rs17165649        | 7        | 131140211       | C        | T        | MKLN1       | G          | 0.45        | 1.00E-05        | 8.30E-01        | -- |
| rs13148112        | 4        | 138118905       | G        | A        | LOC729578   | G          | 0.25        | 1.02E-05        | 1.60E-01        | -- |
| rs7229377         | 18       | 47148299        | T        | C        | NA          | G          | 0.22        | 1.04E-05        | 2.70E-01        | -+ |
| rs7715848         | 5        | 156401478       | G        | C        | NA          | Imp        | 0.17        | 1.05E-05        | 1.97E-01        | ++ |
| rs6883317         | 5        | 156398253       | A        | G        | NA          | G          | 0.17        | 1.07E-05        | 1.84E-01        | -- |
| rs1565310         | 8        | 82696290        | G        | A        | Near FABP5  | Imp        | 0.41        | 1.08E-05        | 6.50E-01        | ++ |
| rs10043150        | 5        | 156396475       | A        | C        | NA          | Imp        | 0.17        | 1.09E-05        | 1.84E-01        | -- |
| rs1560784         | 8        | 75803536        | C        | A        | NA          | G          | 0.35        | 1.10E-05        | 1.68E-01        | -- |
| chr6:5741800      | 6        | 5741800         | G        | A        | FARS2       | Imp        | 0.11        | 1.10E-05        | 4.60E-01        | -+ |
| rs2001214         | 19       | 15724968        | A        | G        | CYP4F8      | Imp        | 0.26        | 1.14E-05        | 1.61E-01        | -+ |
| rs3764564         | 19       | 15724098        | C        | A        | CYP4F8      | G          | 0.26        | 1.14E-05        | 1.61E-01        | -+ |
| rs2570148         | 8        | 75799449        | G        | A        | NA          | Imp        | 0.35        | 1.15E-05        | 1.94E-01        | -- |
| rs33981648        | 7        | 2288669         | C        | T        | NUDT1       | Imp        | 0.36        | 1.15E-05        | 4.82E-01        | -+ |
| <b>rs55731057</b> | <b>4</b> | <b>38798935</b> | <b>T</b> | <b>C</b> | <b>TLR1</b> | <b>Imp</b> | <b>0.25</b> | <b>1.17E-05</b> | <b>6.69E-02</b> | -- |
| rs33922585        | 7        | 2285178         | T        | C        | NUDT1       | G          | 0.37        | 1.19E-05        | 5.21E-01        | -+ |
| rs2570147         | 8        | 75798861        | C        | T        | NA          | Imp        | 0.35        | 1.19E-05        | 1.94E-01        | -- |
| rs4719462         | 7        | 2266384         | G        | A        | MAD1L1      | Imp        | 0.39        | 1.24E-05        | 9.95E-01        | -- |
| rs6429077         | 1        | 238562046       | G        | A        | NA          | Imp        | 0.20        | 1.24E-05        | 6.44E-01        | -- |
| rs7549053         | 1        | 238561021       | T        | C        | NA          | Imp        | 0.20        | 1.24E-05        | 6.44E-01        | ++ |
| rs7835251         | 8        | 82697768        | G        | A        | Near FABP5  | Imp        | 0.41        | 1.26E-05        | 5.66E-01        | ++ |
| rs11634094        | 15       | 87818878        | A        | G        | Near AGBL1  | Imp        | 0.26        | 1.27E-05        | 5.31E-01        | -- |
| rs947520          | 1        | 238563936       | G        | C        | NA          | Imp        | 0.20        | 1.28E-05        | 6.44E-01        | -- |
| rs2065816         | 1        | 238558544       | A        | G        | NA          | Imp        | 0.20        | 1.30E-05        | 6.44E-01        | ++ |
| rs3913350         | 15       | 87814253        | T        | G        | Near AGBL1  | G          | 0.25        | 1.34E-05        | 6.17E-01        | -- |
| rs2825980         | 21       | 21434934        | C        | A        | NA          | G          | 0.14        | 1.37E-05        | 2.28E-01        | -+ |
| rs2712207         | 7        | 107352117       | A        | G        | SLC26A4     | Imp        | 0.21        | 1.38E-05        | 1.90E-01        | -- |
| rs2398668         | 7        | 2298227         | T        | C        | LOC727926   | G          | 0.37        | 1.39E-05        | 4.83E-01        | -+ |
| rs4659525         | 1        | 238564736       | G        | T        | NA          | Imp        | 0.20        | 1.40E-05        | 6.44E-01        | -- |
| rs11937897        | 4        | 138118960       | A        | G        | LOC729578   | Imp        | 0.25        | 1.43E-05        | 1.46E-01        | ++ |
| rs923542          | 1        | 238559897       | C        | A        | NA          | G          | 0.20        | 1.43E-05        | 6.44E-01        | -- |
| rs6911736         | 6        | 5751269         | T        | C        | FARS2       | Imp        | 0.12        | 1.45E-05        | 2.72E-01        | -+ |
| rs10889785        | 1        | 69075013        | T        | A        | NA          | Imp        | 0.15        | 1.48E-05        | 9.68E-01        | -+ |
| <b>rs4833095</b>  | <b>4</b> | <b>38799710</b> | <b>C</b> | <b>T</b> | <b>TLR1</b> | <b>G</b>   | <b>0.25</b> | <b>1.50E-05</b> | <b>8.11E-02</b> | ++ |
| rs12673108        | 7        | 2286487         | A        | C        | NUDT1       | Imp        | 0.38        | 1.53E-05        | 5.30E-01        | -+ |
| rs10502416        | 18       | 12822702        | T        | G        | PTPN2       | G          | 0.24        | 1.54E-05        | 8.36E-01        | -+ |
| rs62382402        | 5        | 156391818       | T        | C        | NA          | Imp        | 0.17        | 1.54E-05        | 1.84E-01        | -- |
| rs10789268        | 1        | 69079128        | G        | C        | NA          | Imp        | 0.16        | 1.55E-05        | 9.22E-01        | -+ |
| rs10465626        | 1        | 238558817       | A        | C        | NA          | Imp        | 0.20        | 1.55E-05        | 6.91E-01        | ++ |
| rs6931033         | 6        | 5760244         | A        | T        | FARS2       | Imp        | 0.12        | 1.56E-05        | 1.95E-01        | -+ |

Supp Table2

|                   |          |                  |          |          |                  |            |             |                 |                 |           |
|-------------------|----------|------------------|----------|----------|------------------|------------|-------------|-----------------|-----------------|-----------|
| rs753100          | 6        | 5752824          | C        | G        | FARS2            | Imp        | 0.12        | 1.57E-05        | 2.73E-01        | -+        |
| rs15956           | 7        | 131180918        | C        | T        | MKLN1            | G          | 0.45        | 1.58E-05        | 8.11E-01        | --        |
| rs12909748        | 15       | 87817547         | T        | G        | Near AGBL1       | Imp        | 0.26        | 1.61E-05        | 6.04E-01        | --        |
| <b>rs5743604</b>  | <b>4</b> | <b>38801285</b>  | <b>G</b> | <b>A</b> | <b>TLR1</b>      | <b>Imp</b> | <b>0.24</b> | <b>1.63E-05</b> | <b>6.27E-02</b> | <b>++</b> |
| rs6833974         | 4        | 138119083        | A        | G        | LOC729578        | Imp        | 0.25        | 1.66E-05        | 1.60E-01        | ++        |
| rs55876899        | 19       | 44592202         | C        | T        | NA               | Imp        | 0.18        | 1.67E-05        | 2.26E-01        | ++        |
| rs12624655        | 20       | 46804959         | T        | G        | NA               | G          | 0.07        | 1.73E-05        | 1.18E-01        | --        |
| rs2712218         | 7        | 107356759        | A        | G        | SLC26A4          | Imp        | 0.21        | 1.73E-05        | 1.92E-01        | --        |
| rs4739828         | 8        | 82704294         | G        | A        | Near FABP5       | Imp        | 0.41        | 1.84E-05        | 6.28E-01        | ++        |
| rs2240533         | 14       | 71541026         | C        | T        | PCNX             | G          | 0.32        | 1.84E-05        | 9.00E-01        | +-        |
| rs1417394         | 6        | 148532022        | A        | G        | NA               | Imp        | 0.41        | 1.88E-05        | 7.39E-02        | +-        |
| rs9409571         | 9        | 97264757         | C        | T        | NA               | Imp        | 0.08        | 1.90E-05        | 1.88E-01        | +-        |
| rs11099428        | 4        | 138122354        | C        | T        | LOC729578        | Imp        | 0.25        | 1.96E-05        | 1.46E-01        | --        |
| rs12482252        | 21       | 21436986         | C        | T        | NA               | Imp        | 0.14        | 2.00E-05        | 2.68E-01        | +-        |
| rs6473304         | 8        | 82702235         | T        | C        | Near FABP5       | Imp        | 0.41        | 2.07E-05        | 6.17E-01        | --        |
| rs2895726         | 8        | 82703302         | C        | G        | Near FABP5       | Imp        | 0.41        | 2.08E-05        | 6.17E-01        | --        |
| rs12482023        | 21       | 21436455         | G        | A        | NA               | Imp        | 0.14        | 2.09E-05        | 2.68E-01        | +-        |
| chr18:12826836    | 18       | 12826836         | A        | G        | PTPN2            | Imp        | 0.24        | 2.15E-05        | 8.68E-01        | -+        |
| <b>rs17616434</b> | <b>4</b> | <b>38812876</b>  | <b>C</b> | <b>T</b> | <b>TLR1</b>      | <b>G</b>   | <b>0.25</b> | <b>2.17E-05</b> | <b>7.17E-02</b> | <b>++</b> |
| rs831125          | 5        | 67587434         | G        | A        | PIK3R1           | Imp        | 0.10        | 2.21E-05        | 3.29E-01        | +-        |
| rs2825981         | 21       | 21435148         | G        | A        | NA               | G          | 0.14        | 2.22E-05        | 2.68E-01        | +-        |
| rs7011481         | 8        | 82699121         | G        | C        | Near FABP5       | Imp        | 0.41        | 2.24E-05        | 5.98E-01        | ++        |
| rs1450542         | 12       | 45195295         | G        | T        | NELL2            | Imp        | 0.25        | 2.24E-05        | 9.54E-01        | +-        |
| rs11762508        | 7        | 2214170          | C        | G        | MAD1L1           | Imp        | 0.40        | 2.25E-05        | 8.06E-01        | ++        |
| rs6690847         | 1        | 238556742        | G        | T        | NA               | Imp        | 0.25        | 2.26E-05        | 3.98E-01        | --        |
| rs1450541         | 12       | 45195228         | T        | G        | NELL2            | G          | 0.25        | 2.27E-05        | 9.54E-01        | -+        |
| rs62097820        | 18       | 12834649         | T        | A        | PTPN2            | Imp        | 0.24        | 2.28E-05        | 8.64E-01        | +-        |
| rs1450543         | 12       | 45198237         | A        | G        | NELL2            | Imp        | 0.25        | 2.30E-05        | 9.54E-01        | -+        |
| <b>rs7553212</b>  | <b>1</b> | <b>216738788</b> | <b>G</b> | <b>A</b> | <b>ESRRG</b>     | <b>G</b>   | <b>0.33</b> | <b>2.32E-05</b> | <b>7.25E-02</b> | <b>++</b> |
| rs5014113         | 8        | 82695476         | G        | A        | Near FABP5       | Imp        | 0.39        | 2.36E-05        | 9.82E-01        | -+        |
| rs6570825         | 6        | 148546210        | A        | G        | NA               | Imp        | 0.39        | 2.38E-05        | 7.18E-02        | +-        |
| rs1934806         | 6        | 148516822        | G        | A        | NA               | Imp        | 0.38        | 2.41E-05        | 2.74E-02        | +         |
| <b>rs1353899</b>  | <b>3</b> | <b>177228979</b> | <b>G</b> | <b>T</b> | <b>LINC00580</b> | <b>Imp</b> | <b>0.19</b> | <b>2.45E-05</b> | <b>4.22E-02</b> | <b>--</b> |
| rs6593185         | 7        | 50858645         | A        | G        | GRB10            | G          | 0.48        | 2.45E-05        | 2.92E-01        | ++        |
| rs4719468         | 7        | 2285019          | C        | G        | NUDT1            | Imp        | 0.36        | 2.45E-05        | 4.84E-01        | +-        |
| rs6956243         | 7        | 107388911        | C        | T        | LOC100128737     | Imp        | 0.24        | 2.45E-05        | 3.36E-01        | ++        |
| rs6924166         | 6        | 148521061        | C        | T        | NA               | Imp        | 0.38        | 2.47E-05        | 2.52E-02        | -+        |
| rs13231387        | 7        | 107389979        | T        | C        | CBLL1            | Imp        | 0.25        | 2.47E-05        | 3.36E-01        | --        |
| rs1160027         | 17       | 53818102         | T        | G        | NA               | G          | 0.23        | 2.48E-05        | 9.54E-01        | --        |
| rs7964017         | 12       | 45185542         | A        | G        | NELL2            | Imp        | 0.25        | 2.50E-05        | 9.67E-01        | -+        |
| rs7846264         | 8        | 82694974         | C        | T        | Near FABP5       | G          | 0.41        | 2.50E-05        | 5.89E-01        | ++        |
| rs1875674         | 17       | 50306841         | T        | C        | NA               | G          | 0.46        | 2.54E-05        | 3.83E-01        | -+        |
| rs13226711        | 7        | 107395342        | A        | G        | CBLL1            | Imp        | 0.25        | 2.54E-05        | 3.26E-01        | --        |
| rs6570821         | 6        | 148517345        | T        | C        | NA               | Imp        | 0.38        | 2.57E-05        | 1.87E-02        | +-        |
| rs7836157         | 8        | 82698362         | G        | A        | Near FABP5       | G          | 0.41        | 2.58E-05        | 5.89E-01        | ++        |
| rs7835201         | 8        | 82698019         | A        | T        | Near FABP5       | Imp        | 0.41        | 2.58E-05        | 5.89E-01        | --        |
| rs7835042         | 8        | 82697896         | A        | G        | Near FABP5       | Imp        | 0.41        | 2.58E-05        | 5.89E-01        | --        |
| rs7787927         | 7        | 107404360        | A        | C        | SLC26A3          | Imp        | 0.24        | 2.64E-05        | 3.08E-01        | --        |
| chr5:137412457    | 5        | 137412457        | A        | G        | NA               | Imp        | 0.18        | 2.68E-05        | 8.42E-01        | --        |
| rs7760944         | 6        | 148521502        | A        | G        | NA               | G          | 0.38        | 2.68E-05        | 1.74E-02        | +-        |
| rs12599104        | 16       | 7173387          | G        | A        | A2BP1            | Imp        | 0.10        | 2.69E-05        | 2.65E-01        | ++        |
| rs7760794         | 6        | 148521441        | A        | G        | NA               | G          | 0.38        | 2.69E-05        | 1.70E-02        | +-        |
| rs4650073         | 1        | 71076662         | A        | G        | NA               | Imp        | 0.37        | 2.69E-05        | 2.82E-01        | -+        |
| rs6473302         | 8        | 82697325         | C        | T        | Near FABP5       | Imp        | 0.42        | 2.70E-05        | 5.89E-01        | ++        |
| rs2328857         | 6        | 148520464        | T        | G        | NA               | Imp        | 0.38        | 2.72E-05        | 2.64E-02        | +-        |
| rs8108021         | 19       | 44595422         | A        | G        | NA               | Imp        | 0.18        | 2.72E-05        | 3.22E-01        | --        |
| rs56353321        | 19       | 44592403         | T        | C        | NA               | Imp        | 0.18        | 2.74E-05        | 3.07E-01        | --        |
| chr5:137418411    | 5        | 137418411        | T        | C        | NA               | Imp        | 0.18        | 2.75E-05        | 9.52E-01        | --        |
| rs11936529        | 4        | 138005442        | G        | T        | LOC729578        | Imp        | 0.45        | 2.76E-05        | 3.57E-02        | -+        |
| rs4730258         | 7        | 107396232        | G        | A        | CBLL1            | Imp        | 0.25        | 2.81E-05        | 3.26E-01        | ++        |
| rs7737549         | 5        | 137320652        | A        | G        | C5orf5           | Imp        | 0.18        | 2.85E-05        | 8.09E-01        | --        |

Supp Table2

|                |    |           |   |   |              |     |      |          |          |    |
|----------------|----|-----------|---|---|--------------|-----|------|----------|----------|----|
| rs6473306      | 8  | 82704598  | T | C | Near FABP5   | Imp | 0.41 | 2.86E-05 | 6.96E-01 | -- |
| rs4386860      | 6  | 3280621   | G | C | SLC22A23     | Imp | 0.08 | 2.87E-05 | 9.03E-01 | ++ |
| rs13356746     | 5  | 137385806 | A | G | NA           | Imp | 0.18 | 2.88E-05 | 8.09E-01 | -- |
| rs56331448     | 5  | 137404831 | C | T | NA           | Imp | 0.18 | 2.92E-05 | 9.20E-01 | ++ |
| rs6939553      | 6  | 148532416 | T | A | NA           | Imp | 0.41 | 2.95E-05 | 6.59E-02 | +  |
| chr11:42976862 | 11 | 42976862  | T | C | NA           | Imp | 0.14 | 2.95E-05 | 8.87E-01 | +  |
| rs60595983     | 5  | 137390720 | A | G | NA           | Imp | 0.18 | 2.95E-05 | 8.10E-01 | -- |
| rs28784623     | 5  | 137379648 | T | C | NA           | Imp | 0.18 | 2.96E-05 | 8.15E-01 | -- |
| rs12363299     | 11 | 42979811  | A | G | NA           | G   | 0.14 | 2.97E-05 | 9.02E-01 | +  |
| chr11:42977976 | 11 | 42977976  | C | G | NA           | Imp | 0.14 | 2.97E-05 | 8.87E-01 | +  |
| rs12705421     | 7  | 107401429 | G | A | NA           | Imp | 0.24 | 2.99E-05 | 3.26E-01 | ++ |
| rs7777754      | 7  | 50666033  | T | G | GRB10        | Imp | 0.31 | 2.99E-05 | 5.04E-01 | -- |
| rs4802204      | 19 | 44597295  | C | A | ZNF224       | Imp | 0.17 | 3.01E-05 | 3.15E-01 | ++ |
| rs4802207      | 19 | 44600377  | C | T | ZNF224       | G   | 0.18 | 3.01E-05 | 3.15E-01 | ++ |
| rs8108404      | 19 | 44603975  | G | T | ZNF224       | Imp | 0.18 | 3.03E-05 | 2.57E-01 | ++ |
| rs9405625      | 6  | 3294843   | G | A | SLC22A23     | Imp | 0.07 | 3.03E-05 | 8.50E-01 | ++ |
| rs9378776      | 6  | 3294810   | T | C | SLC22A23     | Imp | 0.07 | 3.04E-05 | 8.50E-01 | -- |
| rs7705323      | 5  | 137400673 | C | T | NA           | Imp | 0.18 | 3.04E-05 | 8.41E-01 | ++ |
| rs17109053     | 14 | 71609698  | C | G | NA           | Imp | 0.28 | 3.05E-05 | 9.06E-01 | +  |
| chr5:119706275 | 5  | 119706275 | T | G | NA           | Imp | 0.08 | 3.07E-05 | 3.11E-01 | ++ |
| rs3783355      | 14 | 101308958 | A | G | LOC100130955 | G   | 0.25 | 3.11E-05 | 6.82E-01 | ++ |
| rs4521639      | 6  | 3280600   | C | G | SLC22A23     | Imp | 0.08 | 3.13E-05 | 9.03E-01 | -- |
| rs4802205      | 19 | 44597429  | G | A | ZNF224       | Imp | 0.17 | 3.14E-05 | 3.15E-01 | ++ |
| rs2584173      | 15 | 87851985  | A | C | Near AGBL1   | Imp | 0.32 | 3.15E-05 | 3.52E-01 | -- |
| rs62115526     | 19 | 44604914  | T | C | ZNF224       | Imp | 0.17 | 3.16E-05 | 2.69E-01 | -- |
| rs4385351      | 6  | 3280591   | A | C | SLC22A23     | Imp | 0.08 | 3.17E-05 | 9.03E-01 | -- |
| rs2040205      | 21 | 21448471  | G | T | NA           | Imp | 0.15 | 3.18E-05 | 1.58E-01 | +- |
| rs55809453     | 5  | 137370463 | G | T | LOC100130172 | Imp | 0.18 | 3.18E-05 | 8.34E-01 | ++ |
| rs2223136      | 21 | 21453682  | G | A | NA           | Imp | 0.15 | 3.19E-05 | 1.58E-01 | +- |
| rs2826004      | 21 | 21454669  | C | A | NA           | Imp | 0.15 | 3.20E-05 | 1.58E-01 | +- |
| rs2825992      | 21 | 21443755  | G | T | NA           | Imp | 0.15 | 3.21E-05 | 1.41E-01 | +- |
| rs1024779      | 2  | 49137137  | A | G | NA           | G   | 0.38 | 3.23E-05 | 1.27E-01 | +- |
| rs6901527      | 6  | 5763194   | T | A | FARS2        | Imp | 0.12 | 3.23E-05 | 1.90E-01 | +- |
| chr5:137415302 | 5  | 137415302 | G | A | NA           | Imp | 0.18 | 3.24E-05 | 8.41E-01 | ++ |
| rs2825999      | 21 | 21452715  | G | A | NA           | Imp | 0.15 | 3.26E-05 | 1.61E-01 | +- |
| rs12910195     | 15 | 87829960  | G | A | Near AGBL1   | Imp | 0.26 | 3.28E-05 | 4.28E-01 | ++ |
| rs2825989      | 21 | 21441562  | C | T | NA           | Imp | 0.15 | 3.31E-05 | 1.29E-01 | +- |
| rs10904018     | 10 | 3330360   | T | G | NA           | Imp | 0.36 | 3.31E-05 | 9.20E-01 | +  |
| rs2825988      | 21 | 21441535  | A | T | NA           | Imp | 0.15 | 3.31E-05 | 1.29E-01 | +- |
| rs1564103      | 5  | 137340218 | A | C | C5orf5       | Imp | 0.17 | 3.35E-05 | 8.79E-01 | -- |
| rs9409570      | 9  | 97259070  | T | C | NA           | Imp | 0.08 | 3.35E-05 | 1.74E-01 | +- |
| rs9485260      | 6  | 148545616 | G | C | NA           | Imp | 0.39 | 3.38E-05 | 7.18E-02 | +  |
| rs6570824      | 6  | 148545817 | T | C | NA           | Imp | 0.39 | 3.39E-05 | 8.49E-02 | +- |
| chr5:137332325 | 5  | 137332325 | G | A | C5orf5       | Imp | 0.18 | 3.40E-05 | 8.09E-01 | ++ |
| rs2164518      | 15 | 96311424  | G | C | NA           | Imp | 0.08 | 3.41E-05 | 8.76E-01 | +- |
| rs9327806      | 5  | 137348197 | C | A | C5orf5       | Imp | 0.18 | 3.41E-05 | 9.19E-01 | ++ |
| rs28587093     | 5  | 137344187 | A | C | C5orf5       | Imp | 0.18 | 3.42E-05 | 8.09E-01 | -- |
| rs62115524     | 19 | 44592935  | A | G | NA           | Imp | 0.18 | 3.42E-05 | 3.10E-01 | -- |
| rs1041046      | 1  | 69002658  | T | C | NA           | G   | 0.15 | 3.43E-05 | 9.63E-01 | +- |
| rs4435990      | 6  | 3280644   | C | T | SLC22A23     | Imp | 0.08 | 3.44E-05 | 8.96E-01 | ++ |
| rs10808154     | 7  | 107386396 | A | G | LOC100128737 | Imp | 0.24 | 3.44E-05 | 3.16E-01 | -- |
| rs56268907     | 14 | 71606714  | T | C | NA           | Imp | 0.28 | 3.44E-05 | 9.26E-01 | +  |
| rs1564104      | 5  | 137340297 | A | G | C5orf5       | Imp | 0.18 | 3.46E-05 | 8.09E-01 | -- |
| chr5:137422507 | 5  | 137422507 | C | T | WNT8A        | Imp | 0.18 | 3.49E-05 | 9.33E-01 | ++ |
| rs10754634     | 1  | 238558150 | T | G | NA           | Imp | 0.20 | 3.49E-05 | 6.81E-01 | ++ |
| rs7972284      | 12 | 45167183  | T | C | NELL2        | Imp | 0.26 | 3.49E-05 | 9.88E-01 | +  |
| chr9:109941783 | 9  | 109941783 | G | A | NA           | Imp | 0.16 | 3.50E-05 | 3.25E-01 | -- |
| rs12178149     | 6  | 3280891   | G | A | SLC22A23     | Imp | 0.08 | 3.50E-05 | 8.96E-01 | ++ |
| rs4277911      | 5  | 137340443 | T | C | C5orf5       | Imp | 0.18 | 3.52E-05 | 8.09E-01 | -- |
| rs3746321      | 19 | 44612005  | A | G | ZNF224       | Imp | 0.17 | 3.53E-05 | 2.72E-01 | -- |
| rs3200505      | 19 | 44612014  | A | T | ZNF224       | Imp | 0.17 | 3.56E-05 | 2.72E-01 | -- |

Supp Table2

|                   |          |                  |          |          |                  |            |             |                 |                 |           |
|-------------------|----------|------------------|----------|----------|------------------|------------|-------------|-----------------|-----------------|-----------|
| rs59043121        | 4        | 72735857         | G        | A        | NA               | Imp        | 0.08        | 3.59E-05        | 9.79E-01        | +-        |
| rs12178157        | 6        | 3280922          | G        | A        | SLC22A23         | Imp        | 0.08        | 3.59E-05        | 8.96E-01        | ++        |
| rs6570826         | 6        | 148549104        | G        | T        | NA               | Imp        | 0.39        | 3.59E-05        | 6.79E-02        | -+        |
| rs12178148        | 6        | 3280875          | G        | A        | SLC22A23         | Imp        | 0.08        | 3.64E-05        | 8.96E-01        | ++        |
| rs11037173        | 11       | 42970057         | A        | C        | NA               | Imp        | 0.13        | 3.66E-05        | 8.87E-01        | -+        |
| rs11037174        | 11       | 42970128         | C        | G        | NA               | Imp        | 0.14        | 3.66E-05        | 8.87E-01        | -+        |
| rs2201961         | 15       | 87821953         | A        | T        | Near AGBL1       | Imp        | 0.25        | 3.66E-05        | 5.12E-01        | --        |
| rs9920857         | 15       | 87830530         | T        | C        | Near AGBL1       | G          | 0.26        | 3.67E-05        | 4.95E-01        | --        |
| rs11037170        | 11       | 42969651         | T        | G        | NA               | Imp        | 0.13        | 3.68E-05        | 8.87E-01        | -+        |
| rs56229275        | 11       | 42971823         | A        | G        | NA               | Imp        | 0.14        | 3.69E-05        | 8.87E-01        | -+        |
| rs12181510        | 6        | 3280880          | C        | T        | SLC22A23         | Imp        | 0.08        | 3.69E-05        | 8.96E-01        | ++        |
| rs11037172        | 11       | 42969950         | G        | A        | NA               | Imp        | 0.14        | 3.69E-05        | 8.87E-01        | -+        |
| rs7106116         | 11       | 42971168         | C        | G        | NA               | Imp        | 0.14        | 3.70E-05        | 8.87E-01        | -+        |
| chr11:42971112    | 11       | 42971112         | C        | T        | NA               | Imp        | 0.13        | 3.71E-05        | 8.87E-01        | +-        |
| <b>rs1392219</b>  | <b>3</b> | <b>177222429</b> | <b>T</b> | <b>C</b> | <b>LINC00578</b> | <b>G</b>   | <b>0.20</b> | <b>3.72E-05</b> | <b>3.68E-02</b> | <b>++</b> |
| <b>rs59539624</b> | <b>3</b> | <b>177227517</b> | <b>T</b> | <b>G</b> | <b>LINC00579</b> | <b>Imp</b> | <b>0.20</b> | <b>3.73E-05</b> | <b>9.33E-02</b> | <b>++</b> |
| rs6993088         | 8        | 3330914          | A        | G        | CSMD1            | Imp        | 0.39        | 3.73E-05        | 4.04E-01        | --        |
| rs56316096        | 5        | 137314066        | G        | A        | C5orf5           | Imp        | 0.18        | 3.74E-05        | 8.09E-01        | ++        |
| rs17523263        | 5        | 137314469        | C        | T        | C5orf5           | Imp        | 0.18        | 3.74E-05        | 8.09E-01        | ++        |
| rs2068495         | 15       | 87851742         | T        | C        | Near AGBL1       | Imp        | 0.33        | 3.74E-05        | 3.43E-01        | --        |
| <b>rs5743551</b>  | <b>4</b> | <b>38807654</b>  | <b>C</b> | <b>T</b> | <b>TLR1</b>      | <b>Imp</b> | <b>0.25</b> | <b>3.74E-05</b> | <b>8.93E-02</b> | <b>++</b> |
| rs847811          | 2        | 64990197         | G        | A        | NA               | Imp        | 0.05        | 3.77E-05        | 4.51E-01        | ++        |
| rs847810          | 2        | 64990735         | T        | C        | NA               | Imp        | 0.05        | 3.79E-05        | 4.51E-01        | --        |
| rs4887173         | 15       | 87835626         | A        | G        | Near AGBL1       | Imp        | 0.32        | 3.81E-05        | 3.50E-01        | --        |
| rs1668304         | 15       | 87826340         | C        | T        | Near AGBL1       | Imp        | 0.26        | 3.83E-05        | 5.59E-01        | ++        |
| rs10036244        | 5        | 137419725        | G        | A        | WNT8A            | G          | 0.18        | 3.84E-05        | 8.41E-01        | ++        |
| rs1996408         | 19       | 44532732         | G        | A        | ZNF222           | G          | 0.29        | 3.86E-05        | 6.33E-01        | -+        |
| rs2705488         | 15       | 87827353         | G        | C        | Near AGBL1       | Imp        | 0.26        | 3.89E-05        | 5.59E-01        | ++        |
| rs12188288        | 5        | 84501539         | C        | T        | NA               | Imp        | 0.31        | 3.91E-05        | 9.59E-02        | -+        |
| rs11080606        | 18       | 12867969         | C        | T        | PTPN2            | G          | 0.29        | 3.93E-05        | 6.39E-01        | +-        |
| rs10420143        | 19       | 44608082         | A        | G        | ZNF224           | Imp        | 0.13        | 3.93E-05        | 1.27E-01        | --        |
| rs1711949         | 6        | 1405483          | T        | C        | NA               | Imp        | 0.28        | 3.98E-05        | 6.96E-01        | -+        |
| rs10063793        | 5        | 84518137         | A        | G        | NA               | Imp        | 0.31        | 4.01E-05        | 8.47E-02        | -+        |
| rs8091720         | 18       | 12865186         | T        | C        | PTPN2            | Imp        | 0.29        | 4.01E-05        | 6.39E-01        | -+        |
| rs6873072         | 5        | 137386153        | G        | A        | NA               | Imp        | 0.19        | 4.04E-05        | 8.18E-01        | ++        |
| rs10056249        | 5        | 119685686        | A        | G        | NA               | Imp        | 0.08        | 4.07E-05        | 3.39E-01        | ++        |
| chr13:107700332   | 13       | 107700332        | T        | G        | GPC5             | Imp        | 0.13        | 4.10E-05        | 7.56E-01        | ++        |
| rs12404688        | 1        | 69815440         | A        | G        | NA               | G          | 0.05        | 4.10E-05        | 8.45E-01        | -+        |
| rs10889781        | 1        | 69019502         | A        | G        | NA               | Imp        | 0.15        | 4.12E-05        | 7.95E-01        | -+        |
| rs7255145         | 19       | 44535739         | G        | A        | ZNF222           | Imp        | 0.30        | 4.17E-05        | 6.86E-01        | -+        |
| rs714809          | 5        | 119690007        | T        | C        | NA               | Imp        | 0.09        | 4.18E-05        | 3.11E-01        | ++        |
| rs4803667         | 19       | 44533604         | T        | C        | ZNF222           | Imp        | 0.30        | 4.18E-05        | 6.84E-01        | -+        |
| rs7258517         | 19       | 44535999         | G        | T        | ZNF222           | G          | 0.30        | 4.19E-05        | 6.82E-01        | -+        |
| rs17141252        | 6        | 5766453          | T        | C        | FARS2            | G          | 0.12        | 4.20E-05        | 1.49E-01        | -+        |
| rs4768571         | 12       | 45166605         | C        | T        | NELL2            | Imp        | 0.26        | 4.20E-05        | 9.88E-01        | +-        |
| rs4719469         | 7        | 2286778          | C        | T        | NUDT1            | Imp        | 0.38        | 4.20E-05        | 6.21E-01        | -+        |
| rs1600231         | 16       | 7171641          | C        | G        | A2BP1            | Imp        | 0.10        | 4.20E-05        | 2.26E-01        | --        |
| rs62097858        | 18       | 12862581         | A        | G        | PTPN2            | Imp        | 0.29        | 4.20E-05        | 6.39E-01        | -+        |
| rs13361317        | 5        | 119684679        | A        | G        | NA               | Imp        | 0.09        | 4.22E-05        | 3.38E-01        | ++        |
| rs888047          | 7        | 36287032         | C        | T        | EEPD1            | G          | 0.29        | 4.23E-05        | 6.81E-01        | --        |
| rs6496408         | 15       | 87832351         | G        | C        | Near AGBL1       | Imp        | 0.26        | 4.23E-05        | 5.15E-01        | ++        |
| rs7782475         | 7        | 107386251        | T        | C        | LOC100128737     | Imp        | 0.25        | 4.23E-05        | 3.16E-01        | --        |
| rs17089123        | 13       | 72838315         | T        | C        | NA               | Imp        | 0.08        | 4.25E-05        | 1.08E-02        | -+        |
| rs10889779        | 1        | 69009933         | T        | C        | NA               | Imp        | 0.15        | 4.28E-05        | 7.95E-01        | -+        |
| rs3786158         | 18       | 12843275         | A        | G        | PTPN2            | Imp        | 0.28        | 4.32E-05        | 5.40E-01        | -+        |
| rs3737361         | 18       | 12831324         | C        | T        | PTPN2            | Imp        | 0.28        | 4.35E-05        | 5.41E-01        | -+        |
| rs10054679        | 5        | 84533754         | T        | G        | NA               | G          | 0.32        | 4.36E-05        | 1.03E-01        | -+        |
| rs10039795        | 5        | 84502792         | G        | C        | NA               | Imp        | 0.30        | 4.41E-05        | 8.40E-02        | -+        |
| chr4:72750339     | 4        | 72750339         | T        | C        | NA               | Imp        | 0.08        | 4.42E-05        | 9.81E-01        | --        |
| rs1875084         | 15       | 87810042         | A        | G        | Near AGBL1       | Imp        | 0.44        | 4.42E-05        | 6.12E-01        | ++        |
| rs10051546        | 5        | 119683583        | C        | T        | NA               | Imp        | 0.09        | 4.44E-05        | 3.38E-01        | --        |

Supp Table2

|                   |          |                 |          |          |              |            |             |                 |                 |           |
|-------------------|----------|-----------------|----------|----------|--------------|------------|-------------|-----------------|-----------------|-----------|
| rs11037169        | 11       | 42969116        | A        | G        | NA           | G          | 0.14        | 4.47E-05        | 9.05E-01        | -+        |
| rs12361385        | 11       | 42969472        | C        | G        | NA           | Imp        | 0.14        | 4.47E-05        | 9.05E-01        | -+        |
| rs12405366        | 1        | 69007735        | T        | C        | NA           | Imp        | 0.15        | 4.48E-05        | 8.83E-01        | +-        |
| rs11209321        | 1        | 69022532        | T        | A        | NA           | Imp        | 0.15        | 4.52E-05        | 7.95E-01        | -+        |
| rs1924529         | 1        | 69022171        | A        | G        | NA           | Imp        | 0.15        | 4.54E-05        | 7.95E-01        | -+        |
| rs28896300        | 11       | 42967428        | C        | G        | NA           | Imp        | 0.14        | 4.54E-05        | 9.09E-01        | -+        |
| rs7256908         | 19       | 44528898        | C        | T        | ZNF222       | G          | 0.29        | 4.56E-05        | 9.51E-01        | +-        |
| rs17114501        | 12       | 75443180        | C        | T        | KCNC2        | Imp        | 0.09        | 4.57E-05        | 2.81E-01        | ++        |
| rs12535174        | 7        | 2310974         | T        | C        | SNX8         | G          | 0.39        | 4.58E-05        | 7.58E-01        | -+        |
| rs2237679         | 7        | 107334026       | T        | C        | LOC100128597 | G          | 0.24        | 4.59E-05        | 2.65E-01        | --        |
| rs9322135         | 6        | 148550549       | T        | C        | NA           | Imp        | 0.39        | 4.61E-05        | 7.59E-02        | -+        |
| rs17164648        | 5        | 119682607       | A        | G        | NA           | Imp        | 0.09        | 4.63E-05        | 3.43E-01        | ++        |
| rs12181519        | 6        | 3280947         | C        | G        | SLC22A23     | Imp        | 0.08        | 4.63E-05        | 8.96E-01        | --        |
| rs7177388         | 15       | 87817421        | C        | T        | Near AGBL1   | G          | 0.45        | 4.64E-05        | 5.29E-01        | --        |
| rs35784163        | 5        | 84472152        | T        | C        | NA           | Imp        | 0.31        | 4.65E-05        | 2.45E-01        | -+        |
| rs1711973         | 6        | 1402537         | T        | C        | NA           | G          | 0.28        | 4.66E-05        | 7.40E-01        | -+        |
| <b>rs59677118</b> | <b>9</b> | <b>14441677</b> | <b>A</b> | <b>G</b> | <b>NA</b>    | <b>Imp</b> | <b>0.09</b> | <b>4.70E-05</b> | <b>7.83E-03</b> | <b>++</b> |
| rs9925856         | 16       | 7168928         | T        | G        | A2BP1        | Imp        | 0.10        | 4.70E-05        | 1.91E-01        | --        |
| rs7244152         | 18       | 12854294        | C        | G        | PTPN2        | Imp        | 0.28        | 4.70E-05        | 5.64E-01        | -+        |
| rs9403931         | 6        | 148533454       | A        | G        | NA           | Imp        | 0.41        | 4.74E-05        | 6.75E-02        | -+        |
| rs2143586         | 1        | 69054529        | C        | G        | NA           | Imp        | 0.20        | 4.77E-05        | 6.69E-01        | -+        |
| rs10038415        | 5        | 137300867       | C        | T        | C5orf5       | Imp        | 0.18        | 4.81E-05        | 8.09E-01        | ++        |
| rs11080605        | 18       | 12847329        | C        | T        | PTPN2        | Imp        | 0.28        | 4.91E-05        | 5.73E-01        | -+        |
| rs4494564         | 16       | 7169972         | C        | T        | A2BP1        | Imp        | 0.10        | 4.97E-05        | 1.83E-01        | ++        |
| rs36061340        | 8        | 101807230       | T        | C        | NA           | Imp        | 0.06        | 5.00E-05        | 4.43E-02        | --        |
| rs1817108         | 8        | 82773872        | A        | T        | Near SNX16   | Imp        | 0.41        | 5.00E-05        | 9.23E-01        | -+        |
| rs3746319         | 19       | 44612231        | A        | G        | ZNF224       | G          | 0.17        | 5.01E-05        | 3.30E-01        | --        |
| rs6815814         | 4        | 38816338        | C        | A        | TLR1         | Imp        | 0.25        | 5.03E-05        | 1.37E-01        | ++        |
| rs7771180         | 6        | 148523141       | A        | G        | NA           | Imp        | 0.39        | 5.03E-05        | 1.19E-02        | -+        |
| rs11794354        | 9        | 109936874       | T        | C        | NA           | Imp        | 0.16        | 5.03E-05        | 3.00E-01        | ++        |
| rs4404694         | 5        | 29747531        | A        | G        | NA           | Imp        | 0.30        | 5.04E-05        | 4.88E-01        | -+        |
| rs901478          | 15       | 59425158        | A        | G        | NA           | G          | 0.11        | 5.06E-05        | 3.50E-01        | -+        |
| rs277345          | 1        | 75318637        | G        | T        | Near SLC44A5 | Imp        | 0.25        | 5.06E-05        | 1.44E-01        | -+        |
| rs4721527         | 7        | 2306655         | A        | G        | SNX8         | Imp        | 0.39        | 5.07E-05        | 7.24E-01        | -+        |
| rs6573140         | 14       | 57732994        | G        | T        | EXOC5        | Imp        | 0.06        | 5.11E-05        | 1.86E-01        | ++        |
| rs34123713        | 8        | 3329606         | T        | G        | CSMD1        | Imp        | 0.39        | 5.13E-05        | 4.93E-01        | --        |
| rs5017449         | 8        | 82694471        | A        | C        | Near FABP5   | Imp        | 0.44        | 5.14E-05        | 5.67E-01        | --        |
| chr13:107693945   | 13       | 107693945       | C        | T        | GPC5         | Imp        | 0.13        | 5.17E-05        | 7.31E-01        | --        |
| chr12:75419846    | 12       | 75419846        | T        | C        | KCNC2        | Imp        | 0.09        | 5.21E-05        | 3.70E-01        | --        |
| chr13:107707686   | 13       | 107707686       | T        | C        | GPC5         | Imp        | 0.13        | 5.22E-05        | 7.15E-01        | ++        |
| rs9652563         | 15       | 84108982        | G        | A        | NA           | Imp        | 0.43        | 5.24E-05        | 3.01E-01        | --        |
| rs13166222        | 5        | 29749483        | G        | A        | NA           | Imp        | 0.29        | 5.25E-05        | 4.80E-01        | -+        |
| rs11242400        | 5        | 137299347       | A        | G        | C5orf5       | Imp        | 0.18        | 5.25E-05        | 8.09E-01        | --        |
| rs12669625        | 7        | 2315950         | T        | C        | SNX8         | Imp        | 0.39        | 5.25E-05        | 7.57E-01        | -+        |
| rs4562054         | 5        | 29748458        | C        | T        | NA           | Imp        | 0.30        | 5.25E-05        | 5.01E-01        | -+        |
| rs4557401         | 5        | 137283812       | C        | T        | C5orf5       | G          | 0.18        | 5.26E-05        | 8.19E-01        | ++        |
| rs28687894        | 1        | 30033114        | C        | T        | NA           | Imp        | 0.43        | 5.26E-05        | 2.51E-01        | ++        |
| rs7792045         | 7        | 2316852         | T        | C        | SNX8         | G          | 0.39        | 5.27E-05        | 6.93E-01        | -+        |
| rs11629659        | 15       | 87822814        | A        | G        | Near AGBL1   | Imp        | 0.26        | 5.30E-05        | 6.08E-01        | --        |
| rs6983754         | 8        | 82795880        | G        | A        | Near SNX16   | Imp        | 0.41        | 5.31E-05        | 9.25E-01        | -+        |
| rs10141911        | 14       | 57730851        | T        | C        | EXOC5        | Imp        | 0.06        | 5.33E-05        | 1.68E-01        | --        |
| rs6889412         | 5        | 137431957       | T        | C        | NA           | Imp        | 0.18        | 5.34E-05        | 9.33E-01        | --        |
| rs10036824        | 5        | 137298664       | C        | T        | C5orf5       | Imp        | 0.18        | 5.35E-05        | 8.09E-01        | ++        |
| rs28631116        | 1        | 30034107        | G        | A        | NA           | Imp        | 0.43        | 5.36E-05        | 2.44E-01        | ++        |
| rs11256666        | 10       | 10589864        | A        | T        | NA           | Imp        | 0.08        | 5.36E-05        | 9.71E-01        | --        |
| rs34417375        | 7        | 2315105         | T        | C        | SNX8         | Imp        | 0.39        | 5.39E-05        | 7.14E-01        | -+        |
| chr12:75440784    | 12       | 75440784        | G        | C        | KCNC2        | Imp        | 0.09        | 5.40E-05        | 3.02E-01        | ++        |
| rs7751251         | 6        | 148527798       | T        | C        | NA           | Imp        | 0.38        | 5.42E-05        | 1.91E-02        | -+        |
| chr5:137285349    | 5        | 137285349       | T        | C        | C5orf5       | Imp        | 0.18        | 5.42E-05        | 8.09E-01        | --        |
| rs10111831        | 8        | 82791846        | C        | T        | Near SNX16   | G          | 0.41        | 5.49E-05        | 9.30E-01        | -+        |
| rs9559260         | 13       | 108774957       | A        | G        | NA           | Imp        | 0.33        | 5.49E-05        | 6.23E-02        | -+        |

Supp Table2

|                |    |           |   |   |            |     |      |          |          |    |
|----------------|----|-----------|---|---|------------|-----|------|----------|----------|----|
| rs16975604     | 15 | 96307621  | G | C | NA         | Imp | 0.08 | 5.50E-05 | 8.75E-01 | +- |
| chr12:75432350 | 12 | 75432350  | G | T | KCNC2      | Imp | 0.09 | 5.51E-05 | 2.72E-01 | ++ |
| rs427459       | 15 | 84103691  | A | C | NA         | G   | 0.43 | 5.52E-05 | 3.12E-01 | ++ |
| rs10147752     | 14 | 57732270  | G | A | EXOC5      | Imp | 0.06 | 5.52E-05 | 1.68E-01 | ++ |
| rs4453443      | 15 | 87824307  | A | G | Near AGBL1 | Imp | 0.44 | 5.53E-05 | 5.15E-01 | ++ |
| rs1915189      | 4  | 72774077  | G | A | NA         | Imp | 0.08 | 5.54E-05 | 7.10E-01 | ++ |
| rs7544408      | 1  | 75698825  | C | G | SLC44A5    | Imp | 0.40 | 5.55E-05 | 9.90E-01 | -+ |
| rs7147218      | 14 | 57722057  | G | T | EXOC5      | Imp | 0.06 | 5.57E-05 | 2.29E-01 | ++ |
| rs10098684     | 8  | 82791799  | T | G | Near SNX16 | Imp | 0.41 | 5.58E-05 | 9.31E-01 | +- |
| rs11639312     | 15 | 87845959  | C | T | Near AGBL1 | Imp | 0.33 | 5.58E-05 | 2.91E-01 | ++ |
| rs2400544      | 8  | 82786048  | G | T | Near SNX16 | Imp | 0.41 | 5.59E-05 | 9.98E-01 | -- |
| rs11632912     | 15 | 87846085  | A | G | Near AGBL1 | Imp | 0.33 | 5.59E-05 | 2.91E-01 | -- |
| rs10087411     | 8  | 82792584  | A | T | Near SNX16 | Imp | 0.41 | 5.60E-05 | 9.30E-01 | +- |
| rs10050485     | 5  | 137430332 | A | G | NA         | Imp | 0.18 | 5.70E-05 | 9.33E-01 | -- |
| rs2061332      | 19 | 44613661  | A | C | NA         | G   | 0.18 | 5.71E-05 | 3.03E-01 | -- |
| rs5027056      | 5  | 29750276  | C | T | NA         | Imp | 0.29 | 5.71E-05 | 5.14E-01 | -+ |
| chr4:72774867  | 4  | 72774867  | C | T | NA         | Imp | 0.08 | 5.72E-05 | 7.20E-01 | ++ |
| rs1817106      | 8  | 82789453  | T | C | Near SNX16 | Imp | 0.41 | 5.74E-05 | 9.93E-01 | +- |
| rs4721534      | 7  | 2312568   | G | A | SNX8       | Imp | 0.39 | 5.82E-05 | 6.94E-01 | -+ |
| rs1817107      | 8  | 82789609  | T | C | Near SNX16 | G   | 0.41 | 5.82E-05 | 9.93E-01 | +- |
| rs6999102      | 8  | 82795419  | T | G | Near SNX16 | Imp | 0.41 | 5.83E-05 | 9.25E-01 | +- |
| rs10099370     | 8  | 82792376  | T | C | Near SNX16 | Imp | 0.41 | 5.84E-05 | 9.30E-01 | +- |
| rs4409363      | 8  | 82788255  | T | C | Near SNX16 | Imp | 0.41 | 5.84E-05 | 9.83E-01 | ++ |
| rs62512879     | 8  | 82778562  | A | G | Near SNX16 | Imp | 0.41 | 5.87E-05 | 8.51E-01 | +- |
| rs13154169     | 5  | 119762605 | T | C | NA         | Imp | 0.07 | 5.88E-05 | 2.15E-01 | ++ |
| rs55875237     | 5  | 156415029 | T | C | NA         | Imp | 0.17 | 5.90E-05 | 4.90E-01 | -- |
| rs34502289     | 7  | 2311266   | A | G | SNX8       | Imp | 0.39 | 5.94E-05 | 7.70E-01 | +- |
| rs12460993     | 19 | 15698282  | T | C | NA         | Imp | 0.25 | 5.95E-05 | 1.88E-01 | -+ |
| rs7032927      | 9  | 109949144 | G | A | NA         | G   | 0.16 | 5.95E-05 | 4.14E-01 | -- |
| rs28706690     | 1  | 30037536  | A | T | NA         | Imp | 0.35 | 5.98E-05 | 1.58E-01 | -- |
| rs10044267     | 5  | 156416429 | A | G | NA         | Imp | 0.17 | 5.98E-05 | 4.90E-01 | -- |
| rs9504503      | 6  | 5741731   | T | G | FARS2      | G   | 0.16 | 5.98E-05 | 6.72E-02 | -+ |
| rs12050560     | 15 | 96308221  | G | A | NA         | Imp | 0.08 | 6.01E-05 | 8.75E-01 | +- |
| rs7720650      | 5  | 137442353 | A | G | NA         | G   | 0.18 | 6.01E-05 | 9.10E-01 | -- |
| rs61954104     | 13 | 66282880  | G | C | NA         | Imp | 0.06 | 6.04E-05 | 8.86E-01 | -+ |
| rs953988       | 17 | 50311047  | C | T | NA         | Imp | 0.39 | 6.05E-05 | 6.13E-01 | -+ |
| rs10141811     | 14 | 57730748  | T | C | EXOC5      | Imp | 0.06 | 6.06E-05 | 1.91E-01 | -- |
| rs61954101     | 13 | 66278609  | G | A | NA         | Imp | 0.06 | 6.06E-05 | 8.86E-01 | -+ |
| rs2196673      | 7  | 38539735  | A | C | AMPH       | G   | 0.32 | 6.06E-05 | 7.59E-01 | +- |
| rs4370288      | 5  | 29750846  | G | T | NA         | Imp | 0.30 | 6.07E-05 | 5.14E-01 | -+ |
| rs16940117     | 15 | 87850132  | A | G | Near AGBL1 | Imp | 0.32 | 6.08E-05 | 3.97E-01 | -- |
| rs28407457     | 1  | 30037380  | G | T | NA         | Imp | 0.36 | 6.09E-05 | 1.18E-01 | ++ |
| rs1597751      | 8  | 82782460  | C | G | Near SNX16 | Imp | 0.41 | 6.09E-05 | 9.51E-01 | +- |
| rs34406003     | 20 | 61877875  | T | C | NKAIN4     | Imp | 0.36 | 6.10E-05 | 7.78E-01 | +- |
| rs35473038     | 8  | 3329848   | A | G | CSMD1      | Imp | 0.39 | 6.10E-05 | 4.16E-01 | -- |
| rs1451994      | 8  | 82777062  | A | G | Near SNX16 | G   | 0.41 | 6.11E-05 | 9.23E-01 | +- |
| rs4887279      | 15 | 87846448  | A | C | Near AGBL1 | Imp | 0.33 | 6.13E-05 | 2.89E-01 | -- |
| rs13361012     | 5  | 119754079 | G | C | NA         | Imp | 0.07 | 6.15E-05 | 2.46E-01 | -- |
| rs7750434      | 6  | 3281726   | A | C | SLC22A23   | G   | 0.08 | 6.17E-05 | 8.99E-01 | -- |
| rs28648911     | 1  | 30036203  | C | T | NA         | Imp | 0.43 | 6.24E-05 | 1.24E-01 | ++ |
| rs9504505      | 6  | 5746943   | C | T | FARS2      | G   | 0.16 | 6.24E-05 | 1.36E-01 | +- |
| rs2198235      | 8  | 82782108  | T | C | Near SNX16 | Imp | 0.40 | 6.26E-05 | 9.51E-01 | +- |
| rs35542721     | 8  | 3329509   | G | A | CSMD1      | Imp | 0.40 | 6.26E-05 | 4.93E-01 | ++ |
| rs10470656     | 3  | 26700670  | C | T | LRRRC3B    | Imp | 0.23 | 6.26E-05 | 5.01E-01 | -+ |
| rs7674966      | 4  | 179522183 | G | A | NA         | Imp | 0.11 | 6.27E-05 | 9.45E-01 | -- |
| rs2072064      | 7  | 107334513 | A | T | SLC26A4    | Imp | 0.24 | 6.28E-05 | 2.65E-01 | -- |
| rs716690       | 14 | 57728652  | T | C | EXOC5      | Imp | 0.06 | 6.28E-05 | 1.91E-01 | -- |
| rs4887278      | 15 | 87846430  | T | G | Near AGBL1 | Imp | 0.33 | 6.30E-05 | 2.93E-01 | -- |
| rs6573137      | 14 | 57699904  | G | A | EXOC5      | G   | 0.06 | 6.31E-05 | 2.40E-01 | ++ |
| rs1668310      | 15 | 87824542  | C | T | Near AGBL1 | Imp | 0.26 | 6.33E-05 | 6.30E-01 | ++ |
| rs10068206     | 5  | 119756406 | A | G | NA         | Imp | 0.07 | 6.37E-05 | 2.46E-01 | ++ |

Supp Table2

|                   |          |                 |          |          |                   |            |             |                 |                 |           |
|-------------------|----------|-----------------|----------|----------|-------------------|------------|-------------|-----------------|-----------------|-----------|
| rs34327448        | 17       | 50261956        | T        | A        | NA                | Imp        | 0.29        | 6.40E-05        | 2.86E-01        | -+        |
| rs12676438        | 8        | 82765563        | C        | T        | Near SNX16        | Imp        | 0.41        | 6.43E-05        | 9.11E-01        | -+        |
| rs28618972        | 15       | 87846784        | G        | A        | Near AGBL1        | Imp        | 0.32        | 6.45E-05        | 3.21E-01        | ++        |
| rs34626694        | 17       | 50260366        | T        | C        | NA                | Imp        | 0.31        | 6.46E-05        | 4.05E-01        | +-        |
| rs33936956        | 5        | 119748882       | A        | G        | NA                | Imp        | 0.07        | 6.49E-05        | 2.46E-01        | ++        |
| rs34262822        | 7        | 2304275         | T        | C        | SNX8              | Imp        | 0.39        | 6.51E-05        | 7.41E-01        | +-        |
| rs11637453        | 15       | 87849266        | T        | C        | Near AGBL1        | Imp        | 0.33        | 6.52E-05        | 3.20E-01        | --        |
| rs11850616        | 14       | 57731973        | T        | C        | EXOC5             | Imp        | 0.06        | 6.54E-05        | 1.94E-01        | --        |
| chr4:138148706    | 4        | 138148706       | A        | T        | NA                | Imp        | 0.25        | 6.57E-05        | 3.35E-01        | ++        |
| rs1379051         | 5        | 29760433        | G        | A        | NA                | Imp        | 0.29        | 6.59E-05        | 5.00E-01        | -+        |
| rs4887174         | 15       | 87847746        | A        | T        | Near AGBL1        | Imp        | 0.33        | 6.62E-05        | 3.58E-01        | --        |
| rs13359605        | 5        | 137279921       | A        | G        | C5orf5            | Imp        | 0.18        | 6.63E-05        | 7.95E-01        | --        |
| rs277395          | 1        | 75283643        | C        | T        | Near SLC44A5      | Imp        | 0.28        | 6.65E-05        | 1.20E-01        | +         |
| rs10418363        | 19       | 44525463        | A        | G        | NA                | Imp        | 0.29        | 6.66E-05        | 9.40E-01        | --        |
| <b>rs6834581</b>  | <b>4</b> | <b>38788234</b> | <b>C</b> | <b>T</b> | <b>TLR10 TLR1</b> | <b>Imp</b> | <b>0.24</b> | <b>6.67E-05</b> | <b>3.79E-02</b> | <b>++</b> |
| rs2198237         | 8        | 82782053        | T        | C        | Near SNX16        | Imp        | 0.41        | 6.68E-05        | 9.51E-01        | +-        |
| rs11634661        | 15       | 87847244        | G        | C        | Near AGBL1        | Imp        | 0.33        | 6.68E-05        | 3.30E-01        | ++        |
| rs2236193         | 20       | 61878632        | A        | G        | NKAIN4            | Imp        | 0.36        | 6.69E-05        | 8.54E-01        | +-        |
| rs28437406        | 8        | 82767901        | A        | C        | Near SNX16        | Imp        | 0.41        | 6.74E-05        | 9.44E-01        | +-        |
| rs7242788         | 18       | 12820330        | A        | T        | PTPN2             | Imp        | 0.29        | 6.74E-05        | 6.25E-01        | -+        |
| rs277392          | 1        | 75282962        | G        | T        | Near SLC44A5      | Imp        | 0.27        | 6.75E-05        | 1.20E-01        | -+        |
| chr4:72787901     | 4        | 72787901        | C        | T        | NA                | Imp        | 0.08        | 6.76E-05        | 6.66E-01        | ++        |
| rs11987669        | 8        | 82770490        | G        | A        | Near SNX16        | Imp        | 0.41        | 6.79E-05        | 9.12E-01        | -+        |
| rs62033614        | 15       | 87829502        | A        | G        | Near AGBL1        | Imp        | 0.44        | 6.79E-05        | 5.81E-01        | ++        |
| rs1451997         | 8        | 82774053        | T        | A        | Near SNX16        | Imp        | 0.24        | 6.82E-05        | 8.74E-01        | +-        |
| rs11630829        | 15       | 87847188        | C        | T        | Near AGBL1        | G          | 0.33        | 6.83E-05        | 3.37E-01        | ++        |
| rs11086158        | 20       | 61879752        | A        | C        | NKAIN4            | Imp        | 0.35        | 6.84E-05        | 8.71E-01        | +-        |
| rs1248441         | 1        | 75284668        | T        | C        | Near SLC44A5      | Imp        | 0.27        | 6.91E-05        | 1.20E-01        | +-        |
| rs56369924        | 4        | 72792820        | A        | G        | NA                | Imp        | 0.08        | 6.92E-05        | 9.35E-01        | --        |
| rs6819197         | 4        | 72781481        | A        | T        | NA                | Imp        | 0.08        | 6.94E-05        | 6.57E-01        | --        |
| rs4723501         | 7        | 36281708        | T        | A        | EEPD1             | Imp        | 0.28        | 6.94E-05        | 6.01E-01        | --        |
| rs28721894        | 1        | 30038532        | T        | C        | NA                | Imp        | 0.43        | 7.02E-05        | 1.41E-01        | --        |
| <b>rs6531663</b>  | <b>4</b> | <b>38792340</b> | <b>C</b> | <b>T</b> | <b>TLR10 TLR1</b> | <b>Imp</b> | <b>0.24</b> | <b>7.04E-05</b> | <b>5.72E-02</b> | <b>++</b> |
| rs201950          | 8        | 82214841        | C        | G        | Near FABP5        | Imp        | 0.13        | 7.06E-05        | 9.58E-01        | --        |
| rs1980783         | 14       | 57704232        | C        | T        | EXOC5             | Imp        | 0.06        | 7.06E-05        | 2.73E-01        | ++        |
| rs201953          | 8        | 82216588        | C        | T        | Near FABP5        | G          | 0.13        | 7.08E-05        | 7.87E-01        | +-        |
| rs202284          | 8        | 82211671        | C        | T        | Near FABP5        | Imp        | 0.13        | 7.09E-05        | 9.58E-01        | ++        |
| rs201951          | 8        | 82215813        | T        | G        | Near FABP5        | Imp        | 0.13        | 7.09E-05        | 7.87E-01        | -+        |
| rs10133300        | 14       | 57722893        | T        | G        | EXOC5             | G          | 0.06        | 7.10E-05        | 2.29E-01        | --        |
| rs17093005        | 14       | 57711984        | T        | G        | EXOC5             | Imp        | 0.06        | 7.11E-05        | 2.72E-01        | --        |
| rs6573139         | 14       | 57720464        | C        | A        | EXOC5             | Imp        | 0.06        | 7.11E-05        | 2.82E-01        | ++        |
| rs28823280        | 8        | 82777716        | A        | G        | Near SNX16        | Imp        | 0.25        | 7.11E-05        | 9.08E-01        | --        |
| <b>rs4833093</b>  | <b>4</b> | <b>38789740</b> | <b>T</b> | <b>G</b> | <b>TLR10 TLR1</b> | <b>Imp</b> | <b>0.24</b> | <b>7.12E-05</b> | <b>5.71E-02</b> | <b>--</b> |
| rs2400539         | 8        | 82759714        | A        | G        | Near SNX16        | Imp        | 0.41        | 7.13E-05        | 9.08E-01        | ++        |
| rs2284981         | 19       | 44633558        | G        | C        | ZNF225            | Imp        | 0.17        | 7.13E-05        | 2.13E-01        | ++        |
| rs6509133         | 19       | 44522913        | C        | T        | NA                | Imp        | 0.30        | 7.13E-05        | 8.69E-01        | ++        |
| rs9572927         | 13       | 72830207        | A        | G        | NA                | G          | 0.08        | 7.18E-05        | 8.87E-03        | -+        |
| rs9502335         | 6        | 5746379         | C        | T        | FARS2             | Imp        | 0.16        | 7.21E-05        | 1.36E-01        | +-        |
| rs9292340         | 5        | 29761861        | C        | T        | NA                | G          | 0.29        | 7.23E-05        | 5.00E-01        | -+        |
| <b>rs11936050</b> | <b>4</b> | <b>38789524</b> | <b>T</b> | <b>C</b> | <b>TLR10 TLR1</b> | <b>Imp</b> | <b>0.24</b> | <b>7.31E-05</b> | <b>5.71E-02</b> | <b>--</b> |
| rs55881717        | 4        | 72795900        | T        | G        | NA                | Imp        | 0.08        | 7.34E-05        | 6.77E-01        | --        |
| rs10274036        | 7        | 36276663        | T        | C        | EEPD1             | Imp        | 0.28        | 7.35E-05        | 6.34E-01        | ++        |
| rs7961995         | 12       | 75427401        | A        | C        | KCNC2             | Imp        | 0.10        | 7.36E-05        | 2.72E-01        | --        |
| chr12:75426839    | 12       | 75426839        | T        | C        | KCNC2             | Imp        | 0.10        | 7.36E-05        | 2.72E-01        | --        |
| rs4723502         | 7        | 36281897        | T        | C        | EEPD1             | Imp        | 0.29        | 7.38E-05        | 6.01E-01        | ++        |
| chr13:66271716    | 13       | 66271716        | A        | G        | NA                | Imp        | 0.06        | 7.38E-05        | 8.78E-01        | +-        |
| rs17502580        | 7        | 27350607        | G        | A        | NA                | Imp        | 0.11        | 7.39E-05        | 3.96E-01        | +-        |
| rs11083733        | 19       | 44520919        | G        | C        | NA                | Imp        | 0.29        | 7.39E-05        | 8.86E-01        | ++        |
| rs149880          | 8        | 82218892        | T        | C        | Near FABP5        | Imp        | 0.13        | 7.40E-05        | 7.40E-01        | -+        |
| rs6788651         | 3        | 102853034       | T        | G        | NA                | G          | 0.15        | 7.40E-05        | 2.75E-01        | --        |
| rs2061333         | 19       | 44614208        | C        | T        | NA                | G          | 0.17        | 7.40E-05        | 2.93E-01        | ++        |



Supp Table2

|                   |           |                 |          |          |                   |            |             |                 |                 |    |
|-------------------|-----------|-----------------|----------|----------|-------------------|------------|-------------|-----------------|-----------------|----|
| rs1393734         | 17        | 50310245        | T        | C        | NA                | Imp        | 0.29        | 7.41E-05        | 4.20E-01        | -+ |
| rs201952          | 8         | 82215885        | A        | G        | Near FABP5        | Imp        | 0.13        | 7.42E-05        | 7.87E-01        | -+ |
| <b>rs12233670</b> | <b>4</b>  | <b>38787216</b> | <b>T</b> | <b>C</b> | <b>TLR10 TLR1</b> | <b>Imp</b> | <b>0.24</b> | <b>7.42E-05</b> | <b>7.37E-02</b> | -- |
| rs4723500         | 7         | 36281595        | A        | G        | EEPD1             | G          | 0.29        | 7.42E-05        | 6.01E-01        | ++ |
| rs9637684         | 4         | 179523638       | T        | C        | NA                | G          | 0.11        | 7.42E-05        | 9.51E-01        | ++ |
| rs7308197         | 12        | 80115933        | T        | C        | LOC100133105      | G          | 0.13        | 7.43E-05        | 3.21E-01        | -- |
| rs12232810        | 19        | 44525122        | A        | G        | NA                | Imp        | 0.30        | 7.43E-05        | 8.69E-01        | -- |
| rs277394          | 1         | 75283509        | C        | T        | Near SLC44A5      | G          | 0.28        | 7.43E-05        | 1.09E-01        | -+ |
| chr12:75422092    | 12        | 75422092        | G        | A        | KCNC2             | Imp        | 0.09        | 7.44E-05        | 2.72E-01        | ++ |
| rs6789627         | 3         | 102854133       | G        | A        | NA                | Imp        | 0.15        | 7.45E-05        | 2.75E-01        | ++ |
| chr12:75423117    | 12        | 75423117        | C        | A        | KCNC2             | Imp        | 0.10        | 7.47E-05        | 2.72E-01        | ++ |
| rs11083732        | 19        | 44520743        | T        | C        | NA                | Imp        | 0.30        | 7.53E-05        | 8.86E-01        | -- |
| rs829500          | 3         | 165500409       | T        | C        | BCHE              | Imp        | 0.25        | 7.53E-05        | 8.97E-01        | -- |
| rs1355535         | 3         | 165505759       | T        | G        | BCHE              | Imp        | 0.26        | 7.54E-05        | 6.59E-01        | -- |
| rs13357883        | 5         | 137271884       | T        | C        | PKD2L2            | Imp        | 0.18        | 7.55E-05        | 8.19E-01        | -- |
| <b>rs1135430</b>  | <b>4</b>  | <b>38789361</b> | <b>C</b> | <b>T</b> | <b>TLR10 TLR1</b> | <b>Imp</b> | <b>0.24</b> | <b>7.60E-05</b> | <b>6.50E-02</b> | ++ |
| rs28495167        | 15        | 96306882        | A        | G        | NA                | Imp        | 0.08        | 7.61E-05        | 8.75E-01        | -+ |
| rs10075548        | 5         | 156424249       | C        | T        | NA                | Imp        | 0.17        | 7.64E-05        | 4.97E-01        | ++ |
| rs17093036        | 14        | 57734020        | G        | C        | EXOC5             | Imp        | 0.06        | 7.65E-05        | 1.87E-01        | ++ |
| <b>rs204926</b>   | <b>11</b> | <b>8255106</b>  | <b>G</b> | <b>A</b> | <b>LMO1</b>       | <b>Imp</b> | <b>0.48</b> | <b>7.66E-05</b> | <b>5.85E-02</b> | -- |
| rs1376841         | 8         | 82785286        | G        | A        | Near SNX16        | G          | 0.41        | 7.69E-05        | 9.44E-01        | -+ |
| rs7667554         | 4         | 138042070       | C        | T        | LOC729578         | Imp        | 0.29        | 7.72E-05        | 6.14E-01        | -- |
| rs9873779         | 3         | 165508102       | T        | G        | BCHE              | G          | 0.25        | 7.73E-05        | 8.87E-01        | -- |
| rs8183862         | 20        | 61880513        | T        | C        | NKAIN4            | Imp        | 0.36        | 7.74E-05        | 8.58E-01        | +- |
| rs829507          | 3         | 165503453       | T        | C        | BCHE              | Imp        | 0.25        | 7.74E-05        | 9.29E-01        | -- |
| rs1355534         | 3         | 165505857       | T        | C        | BCHE              | Imp        | 0.25        | 7.75E-05        | 9.40E-01        | -- |
| rs28626952        | 15        | 36705714        | T        | G        | NA                | Imp        | 0.22        | 7.76E-05        | 2.07E-01        | +- |
| rs1452001         | 8         | 82800817        | T        | C        | Near SNX16        | G          | 0.41        | 7.77E-05        | 7.92E-01        | +- |
| rs28589362        | 1         | 30039872        | A        | G        | NA                | G          | 0.43        | 7.78E-05        | 1.71E-01        | -- |
| rs10105967        | 8         | 26608542        | C        | T        | ADRA1A            | Imp        | 0.05        | 7.82E-05        | 4.41E-01        | ++ |
| rs7905862         | 10        | 10581844        | A        | G        | NA                | G          | 0.11        | 7.83E-05        | 4.48E-01        | -+ |
| rs17088266        | 8         | 26608263        | G        | C        | ADRA1A            | Imp        | 0.05        | 7.84E-05        | 4.41E-01        | ++ |
| chr4:72787948     | 4         | 72787948        | T        | G        | NA                | Imp        | 0.08        | 7.87E-05        | 6.66E-01        | -- |
| rs10044410        | 5         | 137248668       | C        | T        | PKD2L2            | Imp        | 0.18        | 7.87E-05        | 8.69E-01        | ++ |
| rs12640063        | 4         | 138046596       | T        | C        | LOC729578         | Imp        | 0.29        | 7.88E-05        | 5.62E-01        | ++ |
| rs2897499         | 4         | 138151884       | T        | G        | NA                | Imp        | 0.25        | 7.89E-05        | 3.62E-01        | ++ |
| rs12157838        | 22        | 48835912        | G        | T        | NA                | Imp        | 0.05        | 7.89E-05        | 8.94E-01        | +- |
| rs35423938        | 20        | 61877957        | A        | G        | NKAIN4            | Imp        | 0.36        | 7.91E-05        | 7.84E-01        | +- |
| rs7112441         | 11        | 42960442        | C        | G        | NA                | Imp        | 0.14        | 7.92E-05        | 9.14E-01        | -- |
| rs10853771        | 19        | 44629448        | C        | T        | ZNF225            | Imp        | 0.17        | 7.94E-05        | 1.75E-01        | ++ |
| rs28636665        | 8         | 82758160        | T        | C        | Near SNX16        | Imp        | 0.41        | 7.94E-05        | 9.06E-01        | ++ |
| rs7835833         | 8         | 82763418        | A        | G        | Near SNX16        | Imp        | 0.42        | 7.95E-05        | 9.01E-01        | +- |
| rs12147008        | 14        | 101186175       | C        | T        | NA                | G          | 0.22        | 7.95E-05        | 5.08E-01        | ++ |
| rs10504741        | 8         | 82755353        | C        | A        | Near SNX16        | G          | 0.41        | 7.95E-05        | 9.08E-01        | -- |
| rs10101664        | 8         | 26607280        | C        | T        | ADRA1A            | Imp        | 0.05        | 7.96E-05        | 4.41E-01        | ++ |
| <b>rs1871256</b>  | <b>16</b> | <b>7180064</b>  | <b>A</b> | <b>G</b> | <b>A2BP1</b>      | <b>Imp</b> | <b>0.22</b> | <b>7.99E-05</b> | <b>5.04E-02</b> | -- |
| rs12453010        | 17        | 50316131        | T        | C        | NA                | Imp        | 0.38        | 7.99E-05        | 6.14E-01        | +- |
| chr8:26608070     | 8         | 26608070        | C        | T        | ADRA1A            | Imp        | 0.05        | 8.01E-05        | 4.41E-01        | ++ |
| rs59579836        | 11        | 42962621        | T        | C        | NA                | Imp        | 0.14        | 8.03E-05        | 9.33E-01        | -- |
| rs16937163        | 11        | 42961389        | A        | G        | NA                | Imp        | 0.14        | 8.03E-05        | 9.13E-01        | -- |
| rs829508          | 3         | 165502724       | C        | T        | BCHE              | Imp        | 0.25        | 8.08E-05        | 9.26E-01        | ++ |
| <b>rs28690449</b> | <b>4</b>  | <b>38789132</b> | <b>T</b> | <b>C</b> | <b>TLR10 TLR1</b> | <b>Imp</b> | <b>0.24</b> | <b>8.09E-05</b> | <b>5.71E-02</b> | -- |
| chr11:42964374    | 11        | 42964374        | T        | C        | NA                | Imp        | 0.14        | 8.12E-05        | 9.10E-01        | -- |
| chr1:69867602     | 1         | 69867602        | G        | T        | NA                | Imp        | 0.05        | 8.17E-05        | 8.83E-01        | +- |
| rs3829406         | 14        | 23245252        | G        | A        | SLC7A7            | G          | 0.10        | 8.17E-05        | 3.53E-01        | ++ |
| rs202292          | 8         | 82219639        | A        | G        | Near FABP5        | Imp        | 0.13        | 8.18E-05        | 7.96E-01        | -+ |
| rs2356549         | 19        | 44511202        | A        | T        | ZNF230            | G          | 0.29        | 8.18E-05        | 9.53E-01        | -+ |
| rs149886          | 8         | 82222886        | C        | G        | Near FABP5        | Imp        | 0.12        | 8.18E-05        | 9.53E-01        | -- |
| rs2081523         | 4         | 138157130       | T        | G        | NA                | Imp        | 0.25        | 8.19E-05        | 4.66E-01        | ++ |
| <b>rs6500918</b>  | <b>16</b> | <b>7186902</b>  | <b>G</b> | <b>T</b> | <b>A2BP1</b>      | <b>Imp</b> | <b>0.22</b> | <b>8.19E-05</b> | <b>5.05E-02</b> | ++ |
| rs10038271        | 5         | 156470401       | T        | C        | HAVCR1            | G          | 0.17        | 8.23E-05        | 4.52E-01        | -- |

Supp Table2

|                  |          |                 |          |          |                   |          |             |                 |                 |           |
|------------------|----------|-----------------|----------|----------|-------------------|----------|-------------|-----------------|-----------------|-----------|
| rs10096141       | 8        | 26601495        | G        | A        | NA                | Imp      | 0.05        | 8.23E-05        | 4.26E-01        | ++        |
| rs1979246        | 4        | 138043215       | T        | C        | LOC729578         | Imp      | 0.29        | 8.24E-05        | 5.65E-01        | ++        |
| rs169337         | 8        | 82217689        | C        | T        | Near FABP5        | Imp      | 0.13        | 8.24E-05        | 7.72E-01        | +-        |
| rs149884         | 8        | 82217952        | G        | C        | Near FABP5        | Imp      | 0.13        | 8.24E-05        | 7.72E-01        | +-        |
| rs7611373        | 3        | 2917437         | A        | G        | CNTN4             | Imp      | 0.36        | 8.24E-05        | 8.97E-02        | --        |
| rs149885         | 8        | 82218066        | G        | A        | Near FABP5        | Imp      | 0.13        | 8.24E-05        | 7.72E-01        | +-        |
| rs28696138       | 8        | 82770794        | A        | G        | Near SNX16        | Imp      | 0.25        | 8.25E-05        | 9.76E-01        | --        |
| rs169336         | 8        | 82217435        | C        | G        | Near FABP5        | Imp      | 0.13        | 8.25E-05        | 7.72E-01        | -+        |
| <b>rs4543123</b> | <b>4</b> | <b>38792524</b> | <b>G</b> | <b>A</b> | <b>TLR10 TLR1</b> | <b>G</b> | <b>0.24</b> | <b>8.26E-05</b> | <b>3.34E-02</b> | <b>++</b> |
| rs10041787       | 5        | 137419494       | T        | G        | WNT8A             | G        | 0.13        | 8.28E-05        | 8.31E-01        | --        |
| rs2712210        | 7        | 107327852       | T        | C        | SLC26A4           | G        | 0.24        | 8.29E-05        | 1.35E-01        | --        |
| rs10440755       | 5        | 137414466       | T        | C        | NA                | Imp      | 0.13        | 8.29E-05        | 8.31E-01        | --        |
| rs6843043        | 4        | 38843136        | G        | A        | TLR1              | Imp      | 0.23        | 8.29E-05        | 2.65E-01        | ++        |
| rs9323304        | 14       | 57712482        | C        | A        | EXOC5             | Imp      | 0.06        | 8.29E-05        | 2.22E-01        | ++        |
| rs201954         | 8        | 82219557        | A        | G        | Near FABP5        | Imp      | 0.13        | 8.31E-05        | 7.72E-01        | +-        |
| rs201946         | 8        | 82222292        | C        | A        | Near FABP5        | Imp      | 0.13        | 8.32E-05        | 7.96E-01        | +-        |
| rs12706973       | 7        | 131024681       | G        | A        | MKLN1             | Imp      | 0.39        | 8.37E-05        | 9.68E-01        | --        |
| rs4105690        | 8        | 3328316         | G        | C        | CSMD1             | Imp      | 0.29        | 8.37E-05        | 8.02E-01        | -+        |
| rs12481193       | 20       | 61877940        | A        | G        | NKAIN4            | Imp      | 0.36        | 8.42E-05        | 8.54E-01        | +-        |
| rs4952929        | 2        | 49139350        | C        | G        | NA                | Imp      | 0.41        | 8.44E-05        | 2.54E-01        | +-        |
| rs774469         | 8        | 82723869        | T        | C        | SNX16             | G        | 0.41        | 8.45E-05        | 9.06E-01        | +-        |
| chr1:69869482    | 1        | 69869482        | T        | A        | NA                | Imp      | 0.05        | 8.46E-05        | 8.13E-01        | +-        |
| rs4313769        | 15       | 36706838        | G        | A        | NA                | G        | 0.22        | 8.48E-05        | 1.77E-01        | -+        |
| rs10139409       | 14       | 57694552        | T        | C        | EXOC5             | Imp      | 0.06        | 8.49E-05        | 2.22E-01        | --        |
| rs17518517       | 1        | 223488310       | C        | T        | SUSD4             | G        | 0.22        | 8.49E-05        | 7.88E-01        | --        |
| rs2270926        | 5        | 156469783       | A        | G        | HAVCR1            | Imp      | 0.17        | 8.50E-05        | 4.86E-01        | --        |
| rs10100657       | 8        | 26599218        | A        | G        | NA                | Imp      | 0.05        | 8.53E-05        | 4.26E-01        | --        |
| rs7461469        | 8        | 3328265         | T        | C        | CSMD1             | Imp      | 0.29        | 8.54E-05        | 8.63E-01        | +-        |
| rs2668213        | 3        | 165496037       | T        | A        | BCHE              | Imp      | 0.27        | 8.57E-05        | 8.36E-01        | ++        |
| rs61670721       | 8        | 26609661        | G        | A        | ADRA1A            | Imp      | 0.05        | 8.57E-05        | 4.52E-01        | ++        |
| rs10108571       | 8        | 26601219        | A        | G        | NA                | Imp      | 0.05        | 8.61E-05        | 4.26E-01        | --        |
| rs1236715        | 19       | 44639558        | C        | G        | NA                | Imp      | 0.17        | 8.62E-05        | 1.90E-01        | --        |
| rs1617822        | 15       | 87825688        | G        | A        | Near AGBL1        | Imp      | 0.45        | 8.62E-05        | 6.47E-01        | --        |
| rs11776932       | 8        | 82712929        | C        | A        | SNX16             | G        | 0.41        | 8.64E-05        | 9.06E-01        | -+        |
| rs6987544        | 8        | 82714338        | T        | A        | SNX16             | Imp      | 0.41        | 8.64E-05        | 9.06E-01        | -+        |
| rs9304270        | 18       | 39937509        | T        | C        | LOC284260         | G        | 0.14        | 8.66E-05        | 5.51E-01        | -+        |
| rs1558465        | 7        | 2151398         | C        | G        | MAD1L1            | Imp      | 0.42        | 8.71E-05        | 2.99E-01        | ++        |
| rs1476887        | 7        | 2151633         | C        | T        | MAD1L1            | Imp      | 0.42        | 8.77E-05        | 2.99E-01        | --        |
| rs7008528        | 8        | 82710520        | T        | G        | SNX16             | Imp      | 0.41        | 8.83E-05        | 9.06E-01        | +-        |
| rs6864618        | 5        | 119741331       | T        | C        | NA                | G        | 0.07        | 8.83E-05        | 2.63E-01        | ++        |
| rs942114         | 6        | 5770225         | T        | C        | FARS2             | Imp      | 0.12        | 8.83E-05        | 1.64E-01        | -+        |
| rs902110         | 8        | 82708819        | G        | A        | SNX16             | Imp      | 0.41        | 8.85E-05        | 8.97E-01        | -+        |
| rs12719276       | 5        | 119744849       | A        | G        | NA                | Imp      | 0.07        | 8.87E-05        | 2.46E-01        | ++        |
| rs1582749        | 4        | 138159728       | C        | T        | NA                | Imp      | 0.25        | 8.90E-05        | 5.38E-01        | --        |
| rs5022519        | 8        | 82694500        | G        | C        | Near FABP5        | Imp      | 0.37        | 8.96E-05        | 8.88E-01        | --        |
| rs4557253        | 4        | 84764167        | A        | G        | NA                | Imp      | 0.39        | 9.01E-05        | 5.22E-01        | ++        |
| chr11:43267145   | 11       | 43267145        | G        | A        | NA                | Imp      | 0.12        | 9.01E-05        | 9.94E-01        | ++        |
| rs2600600        | 8        | 82719822        | G        | A        | SNX16             | Imp      | 0.41        | 9.03E-05        | 9.06E-01        | -+        |
| rs1861170        | 2        | 49140018        | T        | A        | NA                | Imp      | 0.40        | 9.03E-05        | 2.77E-01        | -+        |
| rs1031717        | 1        | 69861997        | G        | A        | NA                | Imp      | 0.05        | 9.04E-05        | 8.62E-01        | +-        |
| rs10147790       | 14       | 57693036        | A        | T        | EXOC5             | Imp      | 0.06        | 9.07E-05        | 1.89E-01        | --        |
| rs11591991       | 10       | 11164638        | A        | G        | CUGBP2            | G        | 0.14        | 9.09E-05        | 6.27E-01        | ++        |
| rs201947         | 8        | 82222659        | A        | T        | Near FABP5        | Imp      | 0.13        | 9.09E-05        | 7.96E-01        | -+        |
| rs56215870       | 5        | 137245295       | A        | G        | PKD2L2            | Imp      | 0.18        | 9.10E-05        | 8.63E-01        | --        |
| rs13250611       | 8        | 82716813        | G        | T        | SNX16             | Imp      | 0.41        | 9.11E-05        | 9.06E-01        | -+        |
| rs62119173       | 19       | 44518073        | G        | A        | ZNF230            | Imp      | 0.30        | 9.13E-05        | 9.12E-01        | ++        |
| chr1:223493152   | 1        | 223493152       | G        | T        | SUSD5             | Imp      | 0.22        | 9.14E-05        | 7.74E-01        | --        |
| rs7673348        | 4        | 38845198        | A        | G        | TLR1              | Imp      | 0.23        | 9.17E-05        | 2.65E-01        | --        |
| rs774472         | 8        | 82724531        | T        | A        | SNX16             | Imp      | 0.41        | 9.18E-05        | 9.06E-01        | -+        |
| rs6987463        | 8        | 82714022        | C        | G        | SNX16             | Imp      | 0.41        | 9.19E-05        | 9.06E-01        | +-        |
| rs774475         | 8        | 82727201        | C        | T        | SNX16             | Imp      | 0.41        | 9.19E-05        | 9.06E-01        | -+        |

Supp Table2

|                |    |           |   |   |            |     |      |           |          |    |
|----------------|----|-----------|---|---|------------|-----|------|-----------|----------|----|
| rs10110803     | 8  | 82746436  | C | G | SNX16      | Imp | 0.41 | 9.19E-05  | 9.06E-01 | +- |
| chr11:43281255 | 11 | 43281255  | C | T | NA         | Imp | 0.12 | 9.20E-05  | 9.67E-01 | ++ |
| rs2600604      | 8  | 82720700  | A | G | SNX16      | Imp | 0.41 | 9.22E-05  | 9.45E-01 | +- |
| rs967823       | 17 | 50317276  | G | A | NA         | G   | 0.38 | 9.25E-05  | 6.09E-01 | +- |
| rs59128379     | 8  | 82742959  | G | A | SNX16      | Imp | 0.41 | 9.25E-05  | 9.08E-01 | +- |
| rs58117037     | 8  | 82748183  | T | C | SNX16      | Imp | 0.41 | 9.27E-05  | 9.06E-01 | +- |
| rs7004177      | 8  | 82710137  | C | G | SNX16      | Imp | 0.41 | 9.27E-05  | 9.14E-01 | +- |
| rs4316108      | 8  | 82754365  | C | A | Near SNX16 | Imp | 0.41 | 9.27E-05  | 9.45E-01 | +- |
| rs1554075      | 4  | 138119507 | T | C | LOC729578  | Imp | 0.36 | 9.29E-05  | 1.19E-01 | ++ |
| rs1860831      | 7  | 2160931   | C | T | MAD1L1     | Imp | 0.42 | 9.33E-05  | 3.25E-01 | -- |
| rs1470786      | 8  | 82742288  | G | C | SNX16      | Imp | 0.41 | 9.34E-05  | 9.06E-01 | +- |
| rs8099869      | 19 | 44623376  | C | T | ZNF225     | Imp | 0.16 | 9.34E-05  | 2.04E-01 | ++ |
| rs2588476      | 18 | 53630757  | A | G | NA         | G   | 0.29 | 9.35E-05  | 6.48E-01 | +- |
| rs3802970      | 11 | 17821182  | G | A | SERGEF     | G   | 0.34 | 9.36E-05  | 9.93E-01 | -- |
| rs17714333     | 8  | 82802669  | A | T | Near SNX16 | Imp | 0.43 | 9.36E-05  | 9.44E-01 | +- |
| rs4739628      | 8  | 82738807  | G | C | SNX16      | Imp | 0.41 | 9.38E-05  | 9.06E-01 | +- |
| rs1861400      | 2  | 64906434  | G | A | NA         | Imp | 0.06 | 9.40E-05  | 2.55E-01 | ++ |
| rs36555        | 14 | 71364561  | C | T | NA         | G   | 0.30 | 9.43E-05  | 7.43E-01 | +- |
| rs1021329      | 8  | 82736926  | G | A | SNX16      | Imp | 0.41 | 9.49E-05  | 8.82E-01 | +- |
| rs12539555     | 7  | 107404473 | G | A | SLC26A3    | G   | 0.24 | 9.51E-05  | 2.75E-01 | ++ |
| rs1463258      | 8  | 82737771  | G | A | SNX16      | Imp | 0.41 | 9.52E-05  | 9.06E-01 | +- |
| rs10130359     | 14 | 57716393  | T | C | EXOC5      | Imp | 0.06 | 9.53E-05  | 2.05E-01 | -- |
| rs6534063      | 4  | 118803489 | G | A | NA         | Imp | 0.22 | 9.55E-05  | 9.10E-01 | +- |
| rs2600601      | 8  | 82720107  | C | T | SNX16      | Imp | 0.40 | 9.55E-05  | 8.46E-01 | +- |
| rs2635490      | 8  | 82735459  | G | A | SNX16      | Imp | 0.41 | 9.57E-05  | 9.06E-01 | +- |
| rs7142694      | 14 | 57694988  | C | A | EXOC5      | Imp | 0.06 | 9.57E-05  | 2.76E-01 | ++ |
| rs1236716      | 19 | 44640929  | G | A | NA         | G   | 0.17 | 9.59E-05  | 1.77E-01 | ++ |
| rs17376271     | 5  | 23261312  | A | G | NA         | G   | 0.12 | 9.64E-05  | 1.93E-01 | +- |
| rs12905964     | 15 | 84179115  | T | C | SH3GL3     | G   | 0.41 | 9.69E-05  | 2.13E-01 | -- |
| rs3800909      | 7  | 2159594   | G | C | MAD1L1     | Imp | 0.42 | 9.78E-05  | 3.51E-01 | -- |
| rs9298376      | 8  | 82707096  | G | A | Near SNX16 | Imp | 0.26 | 9.78E-05  | 7.37E-01 | ++ |
| rs993012       | 8  | 82701033  | A | G | Near FABP5 | Imp | 0.39 | 9.79E-05  | 9.50E-01 | +- |
| chr1:69860772  | 1  | 69860772  | A | C | NA         | Imp | 0.05 | 9.81E-05  | 8.74E-01 | +- |
| rs1934807      | 6  | 148516871 | T | C | NA         | Imp | 0.46 | 9.82E-05  | 3.26E-02 | +- |
| rs1206673      | 6  | 5771186   | G | T | FARS2      | Imp | 0.12 | 9.83E-05  | 1.67E-01 | +- |
| rs7841431      | 8  | 82714920  | A | T | SNX16      | Imp | 0.41 | 9.84E-05  | 9.13E-01 | +- |
| rs201948       | 8  | 82227938  | G | A | Near FABP5 | Imp | 0.13 | 9.86E-05  | 8.17E-01 | +- |
| rs266511       | 1  | 182497021 | C | A | RGSL1      | Imp | 0.33 | 9.87E-05  | 1.99E-01 | +- |
| rs4803681      | 19 | 44609485  | G | A | ZNF224     | Imp | 0.17 | 9.89E-05  | 2.67E-01 | ++ |
| rs4508518      | 19 | 44611420  | A | G | ZNF224     | G   | 0.17 | 9.90E-05  | 2.64E-01 | -- |
| rs2192898      | 2  | 64892858  | G | T | NA         | Imp | 0.06 | 9.93E-05  | 1.85E-01 | ++ |
| rs2422282      | 2  | 64899854  | A | C | NA         | Imp | 0.06 | 9.98E-05  | 1.85E-01 | -- |
| rs3172         | 19 | 44609846  | C | G | ZNF224     | Imp | 0.17 | 9.99E-05  | 2.72E-01 | -- |
| rs2191566      | 19 | 44511389  | G | T | ZNF230     | Imp | 0.29 | 0.0001005 | 9.58E-01 | ++ |

<sup>a</sup> Minor allele frequency estimated on founders; <sup>b</sup> direction of effect in COGA and SAGE datasets; Values in bold characters represent trend for association in COGA dataset (P < 0.1)
