# Supplementary material
Source: PubMed Central journal article supplement (PMC3776011)
Supplement: NIHMS490008-supplement-439_2013_1318_MOESM4_ESM.pdf [file NIHMS490008-supplement-439_2013_1318_MOESM4_ESM.pdf]

**Supplementary Table 3**

**Summary of results for the gene-based association analysis on results of COGA and SAGE meta-analysis (  $P < 5 \times 10^{-4}$  )**

| Chr | Gene      | nSNPs | Start <sup>a</sup> | Stop <sup>a</sup> | Test    | Pvalue <sup>b</sup> | Best-SNP   | SNP-pvalue <sup>c</sup> |
|-----|-----------|-------|--------------------|-------------------|---------|---------------------|------------|-------------------------|
| 14  | EXOC5     | 78    | 56738946           | 56805370          | 979.36  | 2.80E-05            | rs11851015 | 8.64E-06                |
| 7   | SLC26A4   | 85    | 107088315          | 107145488         | 613.84  | 3.10E-05            | rs1858930  | 1.10E-05                |
| 14  | C14orf108 | 43    | 56805379           | 56826545          | 575.06  | 5.00E-05            | rs7155721  | 2.96E-05                |
| 19  | ZNF225    | 62    | 49309387           | 49329095          | 568.16  | 5.50E-05            | rs8108021  | 6.22E-05                |
| 2   | ESPNL     | 96    | 238673689          | 238706667         | 503.91  | 5.80E-05            | rs1374479  | 6.23E-05                |
| 19  | ZNF234    | 56    | 49337617           | 49354116          | 498.46  | 5.80E-05            | rs9304638  | 7.16E-05                |
| 19  | ZNF224    | 68    | 49290336           | 49304317          | 630.11  | 5.90E-05            | rs8108021  | 6.22E-05                |
| 19  | ZNF284    | 73    | 49268136           | 49283463          | 772.85  | 7.60E-05            | rs8108021  | 6.22E-05                |
| 2   | UBE2F     | 111   | 238540438          | 238615421         | 1103.87 | 8.30E-05            | rs1374479  | 6.23E-05                |
| 19  | ZNF223    | 79    | 49248003           | 49263982          | 765.14  | 1.03E-04            | rs8108021  | 6.22E-05                |
| 2   | SCLY      | 108   | 238634370          | 238672793         | 876.22  | 1.15E-04            | rs1374479  | 6.23E-05                |
| 4   | TLR10     | 81    | 38450646           | 38460984          | 585.50  | 1.56E-04            | rs5743604  | 4.08E-06                |
| 7   | CBLL1     | 84    | 107171821          | 107187262         | 541.86  | 1.77E-04            | rs982915   | 1.27E-05                |
| 4   | TLR1      | 77    | 38474270           | 38482807          | 549.75  | 1.91E-04            | rs5743604  | 4.08E-06                |
| 4   | TLR1      | 77    | 38474270           | 38482807          | 549.75  | 1.94E-04            | rs5743604  | 4.08E-06                |
| 6   | SLC22A16  | 135   | 110852600          | 110904537         | 531.22  | 2.31E-04            | rs6922009  | 6.61E-04                |
| 12  | OS9       | 60    | 56374152           | 56401607          | 471.44  | 4.04E-04            | rs1629032  | 2.43E-04                |
| 2   | PLCL1     | 254   | 198377777          | 198721365         | 1773.33 | 4.13E-04            | rs745899   | 4.24E-06                |
| 22  | DGCR6L    | 10    | 18681799           | 18687608          | 68.94   | 4.25E-04            | rs11913556 | 1.72E-04                |
| 22  | DERL3     | 123   | 22506689           | 22511201          | 658.90  | 4.95E-04            | rs17003930 | 1.34E-04                |

<sup>a</sup> The start and end position of the gene (BP) based on human genome build 19; <sup>b</sup> P value for the gene based analysis; <sup>c</sup> P value of the strongest SNP in the gene
