# Supplementary material
Source: PubMed Central journal article supplement (PMC3776011)
Supplement: NIHMS490008-supplement-439_2013_1318_MOESM5_ESM.pdf [file NIHMS490008-supplement-439_2013_1318_MOESM5_ESM.pdf]

Supplementary Table 4

Summary of results for the meta-analysis of COGA and SAGE with and without rs1229984 as covariate ( $P < 1 \times 10^{-4}$ )

| CHR | SNP             | BP        | A1 | A2 | Meta-analysis with<br>rs1229984 as covariate <sup>a</sup> |      |          | Meta-analysis without rs1229984<br>as covariate |      |          |
|-----|-----------------|-----------|----|----|-----------------------------------------------------------|------|----------|-------------------------------------------------|------|----------|
|     |                 |           |    |    | Effect                                                    | SE   | P        | Effect                                          | SE   | P        |
| 11  | rs4758317       | 8250811   | a  | c  | -0.08                                                     | 0.02 | 5.10E-07 | -0.08                                           | 0.02 | 7.20E-07 |
| 20  | rs59972978      | 56058355  | a  | t  | -0.10                                                     | 0.02 | 2.46E-06 | -0.09                                           | 0.02 | 5.21E-06 |
| 3   | rs1353899       | 177228979 | t  | g  | -0.09                                                     | 0.02 | 3.14E-06 | -0.09                                           | 0.02 | 4.21E-06 |
| 13  | chr13:87865691  | 87865691  | a  | g  | -0.17                                                     | 0.04 | 3.20E-06 | -0.15                                           | 0.04 | 3.20E-05 |
| 9   | rs59677118      | 14441677  | a  | g  | 0.14                                                      | 0.03 | 3.96E-06 | 0.14                                            | 0.03 | 1.16E-06 |
| 3   | rs1392219       | 177222429 | t  | c  | 0.09                                                      | 0.02 | 4.97E-06 | 0.09                                            | 0.02 | 5.00E-06 |
| 19  | rs10420143      | 44608082  | a  | g  | -0.11                                                     | 0.02 | 5.38E-06 | -0.10                                           | 0.02 | 2.75E-05 |
| 14  | rs7144649       | 57822216  | a  | g  | 0.08                                                      | 0.02 | 6.12E-06 | 0.09                                            | 0.02 | 4.40E-06 |
| 10  | rs12267051      | 77106637  | t  | c  | -0.10                                                     | 0.02 | 6.18E-06 | -0.09                                           | 0.02 | 1.23E-05 |
| 10  | chr10:77108141  | 77108141  | a  | g  | 0.10                                                      | 0.02 | 6.45E-06 | 0.10                                            | 0.02 | 1.26E-05 |
| 13  | chr13:87863337  | 87863337  | a  | c  | -0.15                                                     | 0.03 | 6.49E-06 | -0.13                                           | 0.03 | 6.63E-05 |
| 13  | rs2880705       | 87853961  | t  | c  | 0.15                                                      | 0.03 | 6.53E-06 | 0.13                                            | 0.03 | 6.63E-05 |
| 13  | chr13:87853389  | 87853389  | a  | c  | 0.15                                                      | 0.03 | 6.59E-06 | 0.13                                            | 0.03 | 6.63E-05 |
| 20  | rs12624655      | 46804959  | t  | g  | -0.14                                                     | 0.03 | 6.63E-06 | -0.14                                           | 0.03 | 1.07E-05 |
| 11  | rs204926        | 8255106   | a  | g  | -0.07                                                     | 0.02 | 7.28E-06 | -0.07                                           | 0.02 | 1.66E-05 |
| 13  | chr13:87864345  | 87864345  | a  | g  | -0.15                                                     | 0.03 | 7.30E-06 | -0.13                                           | 0.03 | 7.16E-05 |
| 14  | chr14:101189019 | 101189019 | t  | c  | -0.10                                                     | 0.02 | 8.33E-06 | -0.09                                           | 0.02 | 9.61E-06 |
| 8   | rs36061340      | 101807230 | t  | c  | -0.15                                                     | 0.03 | 8.50E-06 | -0.15                                           | 0.03 | 6.81E-06 |
| 14  | rs17577580      | 101189205 | t  | c  | -0.10                                                     | 0.02 | 8.87E-06 | -0.09                                           | 0.02 | 1.00E-05 |
| 19  | rs55876899      | 44592202  | t  | c  | 0.09                                                      | 0.02 | 9.91E-06 | 0.09                                            | 0.02 | 2.47E-05 |
| 14  | rs11851015      | 57669533  | a  | g  | 0.11                                                      | 0.03 | 9.93E-06 | 0.11                                            | 0.02 | 8.64E-06 |
| 20  | rs62202398      | 46801224  | a  | g  | -0.15                                                     | 0.03 | 9.99E-06 | -0.15                                           | 0.03 | 8.62E-06 |
| 3   | rs59539624      | 177227517 | t  | g  | 0.09                                                      | 0.02 | 1.04E-05 | 0.09                                            | 0.02 | 1.42E-05 |
| 7   | rs3734989       | 131864591 | t  | c  | 0.07                                                      | 0.02 | 1.07E-05 | 0.07                                            | 0.02 | 2.01E-05 |
| 19  | rs8113487       | 44591554  | c  | g  | 0.11                                                      | 0.02 | 1.08E-05 | 0.10                                            | 0.02 | 6.47E-05 |
| 13  | chr13:87904291  | 87904291  | t  | g  | 0.15                                                      | 0.03 | 1.09E-05 | 0.13                                            | 0.03 | 8.18E-05 |
| 15  | rs1491579       | 84178679  | t  | c  | 0.07                                                      | 0.02 | 1.12E-05 | 0.07                                            | 0.02 | 1.47E-05 |
| 7   | chr7:20089751   | 20089751  | a  | g  | -0.13                                                     | 0.03 | 1.20E-05 | -0.13                                           | 0.03 | 8.54E-06 |
| 8   | rs1560784       | 75803536  | a  | c  | -0.07                                                     | 0.02 | 1.27E-05 | -0.07                                           | 0.02 | 1.31E-05 |
| 2   | chr2:198911166  | 198911166 | t  | c  | -0.07                                                     | 0.02 | 1.31E-05 | -0.07                                           | 0.02 | 4.07E-06 |
| 2   | rs10497813      | 198914072 | t  | g  | -0.07                                                     | 0.02 | 1.32E-05 | -0.07                                           | 0.02 | 4.36E-06 |
| 2   | rs2117339       | 198915734 | t  | c  | -0.07                                                     | 0.02 | 1.33E-05 | -0.07                                           | 0.02 | 4.40E-06 |
| 7   | rs2188561       | 107336058 | a  | c  | -0.08                                                     | 0.02 | 1.34E-05 | -0.08                                           | 0.02 | 9.23E-06 |
| 2   | rs745899        | 198908040 | a  | t  | 0.07                                                      | 0.02 | 1.37E-05 | 0.07                                            | 0.02 | 4.24E-06 |
| 2   | rs6732340       | 198912952 | c  | g  | 0.07                                                      | 0.02 | 1.41E-05 | 0.07                                            | 0.02 | 4.63E-06 |
| 19  | rs2300962       | 44620203  | t  | c  | 0.10                                                      | 0.02 | 1.44E-05 | 0.10                                            | 0.02 | 6.61E-05 |
| 2   | rs10206714      | 198906481 | t  | c  | -0.07                                                     | 0.02 | 1.45E-05 | -0.07                                           | 0.02 | 4.50E-06 |
| 14  | rs10137379      | 57674867  | t  | c  | 0.11                                                      | 0.02 | 1.46E-05 | 0.10                                            | 0.02 | 1.23E-05 |
| 2   | rs12329164      | 198905224 | c  | g  | 0.07                                                      | 0.02 | 1.49E-05 | 0.07                                            | 0.02 | 4.49E-06 |
| 8   | rs2570148       | 75799449  | a  | g  | -0.07                                                     | 0.02 | 1.61E-05 | -0.07                                           | 0.02 | 1.74E-05 |
| 2   | rs11690205      | 198933948 | t  | c  | -0.07                                                     | 0.02 | 1.65E-05 | -0.07                                           | 0.02 | 5.87E-06 |
| 8   | rs2570147       | 75798861  | t  | c  | -0.07                                                     | 0.02 | 1.67E-05 | -0.07                                           | 0.02 | 1.80E-05 |
| 2   | rs11690149      | 198933804 | t  | c  | -0.07                                                     | 0.02 | 1.72E-05 | -0.07                                           | 0.02 | 6.18E-06 |
| 2   | rs7587251       | 198930197 | t  | g  | 0.07                                                      | 0.02 | 1.72E-05 | 0.07                                            | 0.02 | 6.06E-06 |
| 19  | rs6509141       | 44613119  | t  | c  | 0.10                                                      | 0.02 | 1.74E-05 | 0.09                                            | 0.02 | 8.71E-05 |
| 2   | rs2196174       | 198905172 | a  | g  | 0.07                                                      | 0.02 | 1.75E-05 | 0.07                                            | 0.02 | 5.49E-06 |
| 2   | rs35062652      | 198927927 | t  | c  | -0.07                                                     | 0.02 | 1.75E-05 | -0.07                                           | 0.02 | 6.13E-06 |
| 2   | rs1371664       | 198904465 | a  | t  | -0.07                                                     | 0.02 | 1.78E-05 | -0.07                                           | 0.02 | 5.61E-06 |
| 2   | rs9712275       | 198907143 | t  | c  | -0.07                                                     | 0.02 | 1.80E-05 | -0.07                                           | 0.02 | 5.77E-06 |
| 14  | rs8022367       | 101189457 | a  | t  | -0.09                                                     | 0.02 | 1.80E-05 | -0.09                                           | 0.02 | 1.79E-05 |
| 7   | rs2712208       | 107343762 | c  | g  | 0.08                                                      | 0.02 | 1.84E-05 | 0.08                                            | 0.02 | 1.32E-05 |

Supp table 4

|    |                |           |   |   |       |      |          |       |      |          |
|----|----------------|-----------|---|---|-------|------|----------|-------|------|----------|
| 2  | rs10497811     | 198902909 | a | c | 0.07  | 0.02 | 1.86E-05 | 0.07  | 0.02 | 5.94E-06 |
| 10 | chr10:77102778 | 77102778  | a | g | -0.09 | 0.02 | 1.88E-05 | -0.09 | 0.02 | 3.38E-05 |
| 2  | rs7572733      | 198929806 | t | c | -0.07 | 0.02 | 1.90E-05 | -0.07 | 0.02 | 6.97E-06 |
| 2  | rs962210       | 198902230 | a | t | 0.07  | 0.02 | 1.93E-05 | 0.07  | 0.02 | 6.11E-06 |
| 19 | rs28539456     | 44607547  | t | g | 0.10  | 0.02 | 1.94E-05 | 0.09  | 0.02 | 8.92E-05 |
| 19 | rs28446946     | 44607619  | t | c | -0.10 | 0.02 | 1.98E-05 | -0.09 | 0.02 | 9.01E-05 |
| 16 | rs6500918      | 7186902   | t | g | 0.08  | 0.02 | 2.05E-05 | 0.08  | 0.02 | 1.33E-05 |
| 19 | rs7250004      | 44602992  | a | g | -0.10 | 0.02 | 2.07E-05 | -0.09 | 0.02 | 8.31E-05 |
| 2  | chr2:198911426 | 198911426 | a | g | -0.07 | 0.02 | 2.07E-05 | -0.07 | 0.02 | 6.73E-06 |
| 9  | rs2642003      | 592229    | t | c | -0.08 | 0.02 | 2.09E-05 | -0.08 | 0.02 | 7.04E-05 |
| 9  | rs2804280      | 589511    | t | c | 0.08  | 0.02 | 2.10E-05 | 0.08  | 0.02 | 7.70E-05 |
| 5  | rs6883317      | 156398253 | a | g | -0.09 | 0.02 | 2.13E-05 | -0.09 | 0.02 | 1.19E-05 |
| 2  | rs2196175      | 198905073 | a | t | -0.07 | 0.02 | 2.14E-05 | -0.07 | 0.02 | 6.98E-06 |
| 19 | rs8104573      | 44603385  | a | g | -0.10 | 0.02 | 2.15E-05 | -0.09 | 0.02 | 8.57E-05 |
| 2  | rs1866666      | 198940607 | t | c | 0.07  | 0.02 | 2.16E-05 | 0.07  | 0.02 | 7.79E-06 |
| 8  | rs61101261     | 101806055 | a | c | -0.15 | 0.03 | 2.17E-05 | -0.14 | 0.03 | 2.10E-05 |
| 19 | rs10410306     | 44601537  | t | c | -0.10 | 0.02 | 2.18E-05 | -0.09 | 0.02 | 8.57E-05 |
| 2  | rs9973400      | 198941578 | t | c | 0.07  | 0.02 | 2.23E-05 | 0.07  | 0.02 | 8.29E-06 |
| 9  | rs2641997      | 594697    | t | g | 0.08  | 0.02 | 2.26E-05 | 0.08  | 0.02 | 6.69E-05 |
| 7  | rs13244286     | 74000679  | a | g | 0.13  | 0.03 | 2.26E-05 | 0.13  | 0.03 | 3.61E-05 |
| 9  | rs2642001      | 593229    | t | c | -0.08 | 0.02 | 2.29E-05 | -0.08 | 0.02 | 7.98E-05 |
| 19 | rs8108404      | 44603975  | t | g | 0.09  | 0.02 | 2.29E-05 | 0.08  | 0.02 | 5.38E-05 |
| 19 | rs56353321     | 44592403  | t | c | -0.09 | 0.02 | 2.30E-05 | -0.08 | 0.02 | 6.07E-05 |
| 16 | rs4444357      | 7190075   | t | c | 0.08  | 0.02 | 2.32E-05 | 0.08  | 0.02 | 1.90E-05 |
| 19 | rs9304638      | 44634086  | t | c | 0.10  | 0.02 | 2.34E-05 | 0.09  | 0.02 | 7.16E-05 |
| 19 | rs4802206      | 44600236  | t | c | 0.10  | 0.02 | 2.38E-05 | 0.09  | 0.02 | 9.09E-05 |
| 7  | rs6968634      | 131867842 | a | g | -0.07 | 0.02 | 2.38E-05 | -0.07 | 0.02 | 4.50E-05 |
| 5  | rs10043150     | 156396475 | a | c | -0.09 | 0.02 | 2.39E-05 | -0.09 | 0.02 | 1.26E-05 |
| 16 | rs922471       | 7190897   | c | g | 0.08  | 0.02 | 2.39E-05 | 0.08  | 0.02 | 1.77E-05 |
| 19 | rs7250171      | 44610305  | t | c | 0.10  | 0.02 | 2.41E-05 | 0.09  | 0.02 | 1.10E-04 |
| 2  | rs1583792      | 198900288 | t | c | -0.07 | 0.02 | 2.41E-05 | -0.07 | 0.02 | 7.26E-06 |
| 5  | rs7715848      | 156401478 | c | g | 0.09  | 0.02 | 2.42E-05 | 0.09  | 0.02 | 1.36E-05 |
| 19 | rs2284978      | 44617310  | a | g | -0.10 | 0.02 | 2.45E-05 | -0.09 | 0.02 | 1.18E-04 |
| 19 | rs7250005      | 44602959  | t | c | 0.10  | 0.02 | 2.46E-05 | 0.09  | 0.02 | 9.83E-05 |
| 19 | rs8105860      | 44606928  | a | g | -0.10 | 0.02 | 2.47E-05 | -0.09 | 0.02 | 1.12E-04 |
| 7  | rs1858930      | 107328537 | a | c | 0.07  | 0.02 | 2.47E-05 | 0.08  | 0.02 | 1.10E-05 |
| 4  | rs13148112     | 138118905 | a | g | -0.08 | 0.02 | 2.47E-05 | -0.08 | 0.02 | 1.05E-05 |
| 16 | rs1871256      | 7180064   | a | g | -0.08 | 0.02 | 2.47E-05 | -0.09 | 0.02 | 1.40E-05 |
| 6  | rs2746177      | 41639575  | a | g | 0.07  | 0.02 | 2.50E-05 | 0.07  | 0.02 | 1.80E-05 |
| 6  | rs2746178      | 41639294  | c | g | 0.07  | 0.02 | 2.53E-05 | 0.07  | 0.02 | 1.80E-05 |
| 7  | chr7:74007163  | 74007163  | a | g | 0.13  | 0.03 | 2.54E-05 | 0.13  | 0.03 | 4.39E-05 |
| 19 | rs8113750      | 44608789  | t | c | 0.10  | 0.02 | 2.58E-05 | 0.09  | 0.02 | 1.14E-04 |
| 19 | rs7251796      | 14135656  | t | c | 0.09  | 0.02 | 2.62E-05 | 0.09  | 0.02 | 2.34E-05 |
| 7  | rs982915       | 107339911 | a | g | -0.07 | 0.02 | 2.63E-05 | -0.07 | 0.02 | 1.27E-05 |
| 19 | rs7250076      | 44610295  | a | g | -0.10 | 0.02 | 2.64E-05 | -0.09 | 0.02 | 1.26E-04 |
| 7  | rs12705591     | 78191370  | t | c | 0.12  | 0.03 | 2.66E-05 | 0.10  | 0.03 | 1.80E-04 |
| 19 | rs4239529      | 44610798  | a | t | -0.10 | 0.02 | 2.66E-05 | -0.09 | 0.02 | 1.23E-04 |
| 19 | rs8108021      | 44595422  | a | g | -0.09 | 0.02 | 2.66E-05 | -0.08 | 0.02 | 6.22E-05 |
| 4  | rs11937897     | 138118960 | a | g | 0.08  | 0.02 | 2.68E-05 | 0.08  | 0.02 | 1.15E-05 |
| 5  | rs62382402     | 156391818 | t | c | -0.09 | 0.02 | 2.69E-05 | -0.09 | 0.02 | 1.58E-05 |
| 10 | rs35616138     | 115220012 | a | t | 0.14  | 0.03 | 2.73E-05 | 0.14  | 0.03 | 2.64E-05 |
| 9  | rs11103603     | 137341600 | t | c | 0.07  | 0.02 | 2.75E-05 | 0.07  | 0.02 | 4.07E-05 |
| 13 | chr13:87650708 | 87650708  | t | g | 0.11  | 0.03 | 2.76E-05 | 0.10  | 0.03 | 8.41E-05 |
| 19 | rs3746321      | 44612005  | a | g | -0.09 | 0.02 | 2.79E-05 | -0.08 | 0.02 | 6.64E-05 |
| 13 | chr13:87682223 | 87682223  | a | g | -0.11 | 0.03 | 2.80E-05 | -0.10 | 0.03 | 7.75E-05 |
| 9  | rs2804266      | 568384    | t | c | -0.08 | 0.02 | 2.82E-05 | -0.08 | 0.02 | 3.79E-05 |
| 19 | rs62115526     | 44604914  | t | c | -0.09 | 0.02 | 2.82E-05 | -0.08 | 0.02 | 6.42E-05 |
| 7  | rs2712207      | 107352117 | a | g | -0.08 | 0.02 | 2.82E-05 | -0.08 | 0.02 | 1.93E-05 |

Supp table 4

|    |                |           |   |   |       |      |          |       |      |          |
|----|----------------|-----------|---|---|-------|------|----------|-------|------|----------|
| 19 | rs3200505      | 44612014  | a | t | -0.09 | 0.02 | 2.83E-05 | -0.08 | 0.02 | 6.73E-05 |
| 13 | rs9524032      | 87622377  | t | c | -0.11 | 0.03 | 2.86E-05 | -0.10 | 0.03 | 9.27E-05 |
| 19 | rs4803677      | 44608963  | t | c | 0.10  | 0.02 | 2.87E-05 | 0.09  | 0.02 | 1.42E-04 |
| 19 | rs7508762      | 44629878  | t | c | -0.10 | 0.02 | 2.88E-05 | -0.09 | 0.02 | 8.18E-05 |
| 21 | rs229369       | 22078587  | a | g | -0.11 | 0.03 | 2.90E-05 | -0.11 | 0.03 | 2.87E-05 |
| 7  | rs34158545     | 74000895  | c | g | -0.13 | 0.03 | 2.90E-05 | -0.12 | 0.03 | 4.87E-05 |
| 19 | rs4803679      | 44609160  | a | t | -0.10 | 0.02 | 2.90E-05 | -0.09 | 0.02 | 1.43E-04 |
| 9  | rs2641996      | 595756    | a | c | -0.08 | 0.02 | 2.92E-05 | -0.08 | 0.02 | 8.70E-05 |
| 22 | rs16985179     | 28029538  | t | c | -0.11 | 0.03 | 2.94E-05 | -0.12 | 0.03 | 6.23E-06 |
| 19 | rs62115524     | 44592935  | a | g | -0.09 | 0.02 | 2.96E-05 | -0.08 | 0.02 | 7.19E-05 |
| 19 | rs4803678      | 44609147  | t | c | 0.10  | 0.02 | 2.97E-05 | 0.09  | 0.02 | 1.46E-04 |
| 7  | rs13246861     | 74000854  | a | g | -0.13 | 0.03 | 2.98E-05 | -0.12 | 0.03 | 4.92E-05 |
| 19 | rs4803680      | 44609293  | t | c | -0.10 | 0.02 | 3.00E-05 | -0.09 | 0.02 | 1.55E-04 |
| 8  | chr8:101808594 | 101808594 | c | g | 0.14  | 0.03 | 3.03E-05 | 0.14  | 0.03 | 3.26E-05 |
| 19 | rs7249834      | 44610095  | a | g | -0.10 | 0.02 | 3.03E-05 | -0.09 | 0.02 | 1.50E-04 |
| 13 | rs9523964      | 87606334  | a | g | 0.11  | 0.03 | 3.04E-05 | 0.10  | 0.03 | 9.86E-05 |
| 13 | rs9523979      | 87608482  | a | g | -0.11 | 0.03 | 3.04E-05 | -0.10 | 0.03 | 9.76E-05 |
| 13 | rs9523980      | 87608688  | t | c | -0.11 | 0.03 | 3.04E-05 | -0.10 | 0.03 | 9.86E-05 |
| 19 | rs4803676      | 44605123  | a | g | 0.10  | 0.02 | 3.07E-05 | 0.09  | 0.02 | 1.64E-04 |
| 16 | rs1904224      | 7191866   | a | t | -0.08 | 0.02 | 3.09E-05 | -0.08 | 0.02 | 2.33E-05 |
| 8  | rs3847152      | 101813074 | t | c | -0.15 | 0.04 | 3.11E-05 | -0.14 | 0.03 | 3.27E-05 |
| 1  | rs7553212      | 216738788 | a | g | 0.07  | 0.02 | 3.11E-05 | 0.07  | 0.02 | 7.14E-06 |
| 6  | rs960710       | 144060958 | a | g | -0.09 | 0.02 | 3.13E-05 | -0.08 | 0.02 | 1.96E-04 |
| 1  | rs10779824     | 230231256 | t | c | 0.08  | 0.02 | 3.13E-05 | 0.07  | 0.02 | 5.72E-05 |
| 19 | rs8101657      | 44609724  | a | t | 0.10  | 0.02 | 3.14E-05 | 0.09  | 0.02 | 1.61E-04 |
| 19 | rs4802205      | 44597429  | a | g | 0.08  | 0.02 | 3.14E-05 | 0.08  | 0.02 | 7.98E-05 |
| 13 | chr13:87663534 | 87663534  | a | c | 0.11  | 0.03 | 3.15E-05 | 0.10  | 0.03 | 8.60E-05 |
| 13 | rs1522016      | 87660794  | a | c | 0.11  | 0.03 | 3.15E-05 | 0.10  | 0.03 | 8.60E-05 |
| 13 | rs7489737      | 87673423  | t | c | -0.11 | 0.03 | 3.15E-05 | -0.10 | 0.03 | 8.60E-05 |
| 13 | rs9516305      | 87671267  | a | g | -0.11 | 0.03 | 3.15E-05 | -0.10 | 0.03 | 8.60E-05 |
| 13 | rs9524259      | 87670460  | t | g | 0.11  | 0.03 | 3.15E-05 | 0.10  | 0.03 | 8.60E-05 |
| 16 | rs11077139     | 7174874   | c | g | -0.08 | 0.02 | 3.16E-05 | -0.08 | 0.02 | 2.19E-05 |
| 8  | chr8:101805088 | 101805088 | a | g | 0.14  | 0.03 | 3.18E-05 | 0.14  | 0.03 | 3.20E-05 |
| 5  | rs13171094     | 119783146 | a | t | -0.12 | 0.03 | 3.18E-05 | -0.12 | 0.03 | 1.98E-05 |
| 19 | rs4802207      | 44600377  | t | c | 0.08  | 0.02 | 3.18E-05 | 0.08  | 0.02 | 7.27E-05 |
| 19 | rs4802204      | 44597295  | a | c | 0.08  | 0.02 | 3.19E-05 | 0.08  | 0.02 | 7.92E-05 |
| 8  | rs58751921     | 101808965 | a | g | 0.14  | 0.03 | 3.20E-05 | 0.14  | 0.03 | 3.40E-05 |
| 8  | rs60243676     | 101809513 | c | g | 0.14  | 0.03 | 3.20E-05 | 0.14  | 0.03 | 3.43E-05 |
| 13 | rs4307816      | 87730252  | a | g | 0.11  | 0.03 | 3.22E-05 | 0.10  | 0.03 | 7.83E-05 |
| 8  | rs10464815     | 101808151 | a | c | 0.14  | 0.03 | 3.23E-05 | 0.14  | 0.03 | 3.43E-05 |
| 8  | rs35866478     | 101807365 | a | g | -0.14 | 0.03 | 3.23E-05 | -0.14 | 0.03 | 3.43E-05 |
| 8  | rs59317432     | 101809662 | a | g | -0.14 | 0.03 | 3.23E-05 | -0.14 | 0.03 | 3.43E-05 |
| 2  | rs2540088      | 59762560  | c | g | 0.07  | 0.02 | 3.25E-05 | 0.07  | 0.02 | 4.87E-05 |
| 13 | rs9516472      | 87760964  | t | c | 0.11  | 0.03 | 3.25E-05 | 0.10  | 0.03 | 7.64E-05 |
| 13 | chr13:87904329 | 87904329  | a | g | 0.14  | 0.03 | 3.25E-05 | 0.12  | 0.03 | 2.25E-04 |
| 20 | rs60630422     | 46802989  | a | c | -0.14 | 0.03 | 3.28E-05 | -0.14 | 0.03 | 2.77E-05 |
| 19 | rs7249827      | 44610029  | a | c | 0.10  | 0.02 | 3.28E-05 | 0.09  | 0.02 | 1.65E-04 |
| 13 | rs9516471      | 87760867  | a | g | -0.11 | 0.03 | 3.29E-05 | -0.10 | 0.03 | 7.55E-05 |
| 13 | rs993452       | 87762176  | t | c | 0.11  | 0.03 | 3.29E-05 | 0.10  | 0.03 | 7.63E-05 |
| 8  | rs3750204      | 144732450 | a | g | -0.08 | 0.02 | 3.30E-05 | -0.08 | 0.02 | 3.26E-05 |
| 4  | rs55731057     | 38798935  | t | c | -0.08 | 0.02 | 3.31E-05 | -0.08 | 0.02 | 3.31E-06 |
| 7  | rs2712218      | 107356759 | a | g | -0.08 | 0.02 | 3.31E-05 | -0.08 | 0.02 | 2.35E-05 |
| 14 | rs7155721      | 57697430  | a | c | 0.10  | 0.02 | 3.33E-05 | 0.10  | 0.02 | 2.96E-05 |
| 13 | rs9516185      | 87603603  | t | g | -0.11 | 0.03 | 3.37E-05 | -0.10 | 0.03 | 1.11E-04 |
| 8  | rs3847151      | 101809800 | a | g | 0.14  | 0.03 | 3.39E-05 | 0.14  | 0.03 | 3.49E-05 |
| 4  | rs1554075      | 138119507 | t | c | 0.07  | 0.02 | 3.40E-05 | 0.07  | 0.02 | 4.76E-05 |
| 2  | rs1579695      | 198900363 | a | g | -0.07 | 0.02 | 3.40E-05 | -0.07 | 0.02 | 1.12E-05 |
| 16 | rs11150542     | 83157119  | a | g | 0.07  | 0.02 | 3.41E-05 | 0.07  | 0.02 | 2.21E-05 |

Supp table 4

|    |                |           |   |   |       |      |          |       |      |          |
|----|----------------|-----------|---|---|-------|------|----------|-------|------|----------|
| 9  | rs2642002      | 592718    | t | c | 0.08  | 0.02 | 3.43E-05 | 0.08  | 0.02 | 1.14E-04 |
| 13 | rs9524641      | 87767861  | a | g | -0.11 | 0.03 | 3.48E-05 | -0.10 | 0.03 | 7.96E-05 |
| 4  | rs11099428     | 138122354 | t | c | -0.08 | 0.02 | 3.49E-05 | -0.08 | 0.02 | 1.47E-05 |
| 14 | rs7157608      | 57671215  | t | c | 0.10  | 0.02 | 3.49E-05 | 0.09  | 0.02 | 3.84E-05 |
| 6  | chr6:149193303 | 149193303 | a | g | 0.10  | 0.02 | 3.54E-05 | 0.10  | 0.02 | 3.76E-05 |
| 19 | rs2068061      | 44610665  | a | g | -0.10 | 0.02 | 3.56E-05 | -0.09 | 0.02 | 1.49E-04 |
| 19 | rs2168778      | 44631219  | t | c | -0.10 | 0.02 | 3.58E-05 | -0.09 | 0.02 | 1.05E-04 |
| 15 | rs12372944     | 81135449  | t | c | -0.08 | 0.02 | 3.58E-05 | -0.08 | 0.02 | 4.17E-05 |
| 4  | rs6833974      | 138119083 | a | g | 0.08  | 0.02 | 3.59E-05 | 0.08  | 0.02 | 1.48E-05 |
| 6  | rs11965507     | 149195423 | a | g | 0.10  | 0.02 | 3.61E-05 | 0.10  | 0.02 | 4.04E-05 |
| 8  | rs2400474      | 82706439  | a | g | -0.07 | 0.02 | 3.65E-05 | -0.07 | 0.02 | 2.16E-05 |
| 14 | rs3742578      | 57672715  | t | c | -0.10 | 0.02 | 3.66E-05 | -0.10 | 0.02 | 3.18E-05 |
| 13 | rs55996493     | 87916330  | t | g | -0.14 | 0.03 | 3.66E-05 | -0.12 | 0.03 | 2.48E-04 |
| 19 | rs4804154      | 11334179  | t | c | -0.10 | 0.03 | 3.67E-05 | -0.10 | 0.03 | 1.25E-04 |
| 7  | rs13242509     | 78190213  | t | c | 0.12  | 0.03 | 3.70E-05 | 0.10  | 0.03 | 2.04E-04 |
| 13 | chr13:87919594 | 87919594  | a | g | 0.14  | 0.03 | 3.70E-05 | 0.12  | 0.03 | 2.46E-04 |
| 13 | rs9584182      | 87692257  | a | g | 0.11  | 0.03 | 3.72E-05 | 0.10  | 0.03 | 1.04E-04 |
| 2  | rs11889326     | 198899275 | a | c | 0.06  | 0.02 | 3.79E-05 | 0.07  | 0.02 | 1.05E-05 |
| 8  | rs12679735     | 144733805 | t | c | -0.08 | 0.02 | 3.79E-05 | -0.08 | 0.02 | 3.65E-05 |
| 2  | rs2249543      | 238974811 | a | g | 0.09  | 0.02 | 3.85E-05 | 0.08  | 0.02 | 6.73E-05 |
| 8  | rs10808366     | 101810647 | t | g | 0.14  | 0.03 | 3.86E-05 | 0.14  | 0.03 | 4.14E-05 |
| 8  | rs10808365     | 101810491 | t | c | 0.14  | 0.03 | 3.89E-05 | 0.14  | 0.03 | 4.18E-05 |
| 8  | rs10808368     | 101810846 | t | g | 0.14  | 0.03 | 3.89E-05 | 0.14  | 0.03 | 4.18E-05 |
| 8  | rs7016087      | 101810936 | a | g | -0.14 | 0.03 | 3.89E-05 | -0.14 | 0.03 | 4.18E-05 |
| 2  | rs2248824      | 238993104 | t | c | 0.09  | 0.02 | 3.90E-05 | 0.08  | 0.02 | 6.97E-05 |
| 8  | rs6993814      | 101810732 | t | g | 0.14  | 0.04 | 3.91E-05 | 0.14  | 0.03 | 4.01E-05 |
| 9  | rs2808560      | 101262218 | t | c | 0.13  | 0.03 | 3.91E-05 | 0.12  | 0.03 | 1.52E-04 |
| 2  | rs1541953      | 198898344 | a | t | 0.06  | 0.02 | 3.92E-05 | 0.07  | 0.02 | 1.06E-05 |
| 19 | rs10853771     | 44629448  | t | c | 0.09  | 0.02 | 3.93E-05 | 0.08  | 0.02 | 7.06E-05 |
| 14 | rs10141911     | 57730851  | t | c | -0.14 | 0.03 | 3.95E-05 | -0.14 | 0.03 | 3.71E-05 |
| 2  | rs2243545      | 238969150 | t | c | -0.09 | 0.02 | 3.95E-05 | -0.08 | 0.02 | 6.15E-05 |
| 14 | rs11846972     | 57688856  | a | t | 0.10  | 0.02 | 3.95E-05 | 0.10  | 0.02 | 3.59E-05 |
| 3  | rs4646718      | 125867263 | a | c | 0.22  | 0.05 | 3.95E-05 | 0.06  | 0.04 | 9.86E-02 |
| 3  | rs4646719      | 125866621 | a | g | 0.22  | 0.05 | 3.95E-05 | 0.05  | 0.04 | 1.39E-01 |
| 9  | chr9:14432393  | 14432393  | t | c | 0.12  | 0.03 | 3.95E-05 | 0.13  | 0.03 | 1.30E-05 |
| 2  | rs2248825      | 238993045 | a | g | -0.09 | 0.02 | 3.96E-05 | -0.08 | 0.02 | 6.80E-05 |
| 14 | rs10150771     | 57675185  | t | c | -0.10 | 0.02 | 3.96E-05 | -0.10 | 0.02 | 3.50E-05 |
| 8  | rs7016436      | 101811224 | a | g | -0.14 | 0.03 | 3.96E-05 | -0.14 | 0.03 | 4.21E-05 |
| 8  | rs12677935     | 2744515   | c | g | -0.12 | 0.03 | 3.98E-05 | -0.13 | 0.03 | 2.03E-05 |
| 9  | rs2804304      | 606439    | t | c | -0.08 | 0.02 | 3.98E-05 | -0.08 | 0.02 | 1.14E-04 |
| 2  | rs10196612     | 198894139 | t | c | 0.06  | 0.02 | 3.99E-05 | 0.07  | 0.02 | 1.18E-05 |
| 2  | rs1374479      | 238968025 | c | g | 0.09  | 0.02 | 4.00E-05 | 0.08  | 0.02 | 6.23E-05 |
| 2  | rs2250038      | 238970943 | t | g | -0.09 | 0.02 | 4.00E-05 | -0.08 | 0.02 | 6.15E-05 |
| 2  | rs2250039      | 238970937 | a | g | -0.09 | 0.02 | 4.00E-05 | -0.08 | 0.02 | 6.23E-05 |
| 19 | rs4459653      | 44599615  | t | c | 0.09  | 0.02 | 4.00E-05 | 0.08  | 0.02 | 1.16E-04 |
| 2  | rs2249067      | 238991187 | a | g | -0.09 | 0.02 | 4.01E-05 | -0.08 | 0.02 | 6.89E-05 |
| 2  | rs1025549      | 198881183 | a | g | -0.06 | 0.02 | 4.01E-05 | -0.07 | 0.02 | 1.05E-05 |
| 4  | rs17616434     | 38812876  | t | c | 0.07  | 0.02 | 4.02E-05 | 0.08  | 0.02 | 6.71E-06 |
| 14 | rs10134311     | 57670042  | t | c | -0.10 | 0.02 | 4.02E-05 | -0.09 | 0.02 | 3.52E-05 |
| 9  | rs9409930      | 137342468 | t | c | 0.07  | 0.02 | 4.03E-05 | 0.07  | 0.02 | 6.65E-05 |
| 8  | rs12676437     | 2744272   | t | c | 0.12  | 0.03 | 4.04E-05 | 0.13  | 0.03 | 2.00E-05 |
| 2  | rs821484       | 238967652 | a | t | 0.09  | 0.02 | 4.06E-05 | 0.08  | 0.02 | 6.30E-05 |
| 13 | rs8002837      | 87701273  | t | g | 0.11  | 0.03 | 4.06E-05 | 0.10  | 0.03 | 9.46E-05 |
| 2  | rs6738825      | 198896895 | a | g | 0.06  | 0.02 | 4.07E-05 | 0.07  | 0.02 | 1.10E-05 |
| 2  | rs10184227     | 198894305 | t | c | -0.06 | 0.02 | 4.07E-05 | -0.07 | 0.02 | 1.11E-05 |
| 2  | rs1978888      | 198889245 | t | c | 0.06  | 0.02 | 4.11E-05 | 0.07  | 0.02 | 1.15E-05 |
| 2  | rs11681663     | 198882952 | a | g | -0.06 | 0.02 | 4.12E-05 | -0.07 | 0.02 | 1.09E-05 |
| 13 | rs17614422     | 87695071  | a | c | -0.11 | 0.03 | 4.13E-05 | -0.10 | 0.03 | 9.77E-05 |

Supp table 4

|    |                |           |   |   |       |      |          |       |      |          |
|----|----------------|-----------|---|---|-------|------|----------|-------|------|----------|
| 1  | rs12086347     | 230263373 | a | g | 0.07  | 0.02 | 4.13E-05 | 0.07  | 0.02 | 1.05E-04 |
| 13 | chr13:87688863 | 87688863  | t | c | 0.10  | 0.03 | 4.14E-05 | 0.10  | 0.03 | 1.16E-04 |
| 19 | rs8113249      | 44591360  | a | g | 0.09  | 0.02 | 4.14E-05 | 0.08  | 0.02 | 1.20E-04 |
| 8  | rs3843551      | 101813045 | a | g | 0.14  | 0.03 | 4.15E-05 | 0.14  | 0.03 | 4.39E-05 |
| 5  | rs10941010     | 32561800  | t | c | -0.07 | 0.02 | 4.16E-05 | -0.07 | 0.02 | 3.39E-05 |
| 8  | rs13274060     | 101812827 | a | t | 0.14  | 0.03 | 4.16E-05 | 0.14  | 0.03 | 4.41E-05 |
| 8  | rs13276772     | 101812937 | t | c | 0.14  | 0.03 | 4.16E-05 | 0.14  | 0.03 | 4.41E-05 |
| 2  | rs821482       | 238971111 | t | c | 0.09  | 0.02 | 4.17E-05 | 0.08  | 0.02 | 6.22E-05 |
| 1  | rs12726525     | 230235032 | a | g | 0.07  | 0.02 | 4.18E-05 | 0.07  | 0.02 | 6.58E-05 |
| 2  | rs2139049      | 198887660 | a | g | -0.06 | 0.02 | 4.18E-05 | -0.07 | 0.02 | 1.21E-05 |
| 14 | rs60328452     | 57684301  | a | t | 0.10  | 0.02 | 4.20E-05 | 0.09  | 0.02 | 3.73E-05 |
| 21 | rs2128345      | 22085847  | a | g | 0.09  | 0.02 | 4.20E-05 | 0.08  | 0.02 | 8.48E-05 |
| 9  | rs56037905     | 14432026  | a | g | 0.12  | 0.03 | 4.21E-05 | 0.13  | 0.03 | 1.39E-05 |
| 2  | rs10166845     | 198896071 | a | g | 0.06  | 0.02 | 4.22E-05 | 0.07  | 0.02 | 1.16E-05 |
| 11 | rs12574271     | 8254503   | t | g | 0.07  | 0.02 | 4.23E-05 | 0.08  | 0.02 | 1.81E-05 |
| 16 | rs8052094      | 7188546   | t | c | -0.08 | 0.02 | 4.23E-05 | -0.08 | 0.02 | 2.72E-05 |
| 2  | rs821480       | 238972827 | t | c | 0.09  | 0.02 | 4.24E-05 | 0.08  | 0.02 | 7.43E-05 |
| 14 | rs10135879     | 57684134  | t | c | 0.10  | 0.02 | 4.25E-05 | 0.09  | 0.02 | 3.78E-05 |
| 9  | chr9:14436295  | 14436295  | a | g | 0.12  | 0.03 | 4.26E-05 | 0.13  | 0.03 | 1.54E-05 |
| 14 | rs1555788      | 57685172  | a | c | 0.10  | 0.02 | 4.27E-05 | 0.09  | 0.02 | 3.79E-05 |
| 8  | rs7012929      | 101811997 | t | g | 0.14  | 0.03 | 4.27E-05 | 0.14  | 0.03 | 4.52E-05 |
| 13 | rs9584183      | 87692279  | t | c | 0.10  | 0.03 | 4.28E-05 | 0.10  | 0.03 | 1.03E-04 |
| 14 | rs4612984      | 57670959  | t | c | 0.09  | 0.02 | 4.32E-05 | 0.09  | 0.02 | 3.79E-05 |
| 16 | rs8047522      | 7189411   | t | c | -0.08 | 0.02 | 4.33E-05 | -0.08 | 0.02 | 2.87E-05 |
| 2  | rs2264165      | 238966048 | a | g | -0.09 | 0.02 | 4.33E-05 | -0.08 | 0.02 | 6.66E-05 |
| 2  | rs843975       | 238967565 | a | c | 0.09  | 0.02 | 4.33E-05 | 0.08  | 0.02 | 6.66E-05 |
| 8  | rs7013576      | 101812400 | t | c | 0.14  | 0.04 | 4.33E-05 | 0.14  | 0.03 | 4.51E-05 |
| 11 | rs11029525     | 26355874  | a | c | -0.07 | 0.02 | 4.35E-05 | -0.07 | 0.02 | 3.33E-05 |
| 16 | rs35269146     | 7189414   | a | t | 0.08  | 0.02 | 4.36E-05 | 0.08  | 0.02 | 2.89E-05 |
| 13 | rs9516421      | 87731598  | t | g | -0.11 | 0.03 | 4.36E-05 | -0.10 | 0.03 | 1.06E-04 |
| 8  | rs7016480      | 101811390 | t | c | -0.14 | 0.03 | 4.37E-05 | -0.14 | 0.03 | 4.48E-05 |
| 6  | rs9390132      | 144061689 | a | g | -0.11 | 0.03 | 4.37E-05 | -0.10 | 0.03 | 2.29E-04 |
| 2  | rs2196171      | 198889807 | t | g | 0.06  | 0.02 | 4.37E-05 | 0.07  | 0.02 | 1.24E-05 |
| 2  | rs6755144      | 40636240  | a | g | 0.08  | 0.02 | 4.38E-05 | 0.08  | 0.02 | 4.04E-05 |
| 2  | rs11683222     | 198884028 | c | g | 0.06  | 0.02 | 4.38E-05 | 0.07  | 0.02 | 1.16E-05 |
| 2  | rs34692727     | 198883513 | t | c | -0.06 | 0.02 | 4.38E-05 | -0.07 | 0.02 | 1.13E-05 |
| 16 | rs11863081     | 7189576   | a | c | -0.08 | 0.02 | 4.39E-05 | -0.08 | 0.02 | 3.00E-05 |
| 13 | rs9584222      | 87722819  | a | g | -0.10 | 0.03 | 4.41E-05 | -0.10 | 0.03 | 1.03E-04 |
| 13 | rs9524349      | 87701135  | t | c | 0.10  | 0.03 | 4.44E-05 | 0.10  | 0.03 | 1.04E-04 |
| 2  | rs821486       | 238966691 | t | c | 0.09  | 0.02 | 4.45E-05 | 0.08  | 0.02 | 6.91E-05 |
| 13 | chr13:87697135 | 87697135  | t | g | -0.10 | 0.03 | 4.47E-05 | -0.10 | 0.03 | 1.06E-04 |
| 13 | rs10161716     | 87732390  | t | c | -0.10 | 0.03 | 4.47E-05 | -0.10 | 0.03 | 1.02E-04 |
| 14 | rs10147752     | 57732270  | a | g | 0.14  | 0.04 | 4.47E-05 | 0.14  | 0.03 | 4.30E-05 |
| 13 | rs9516349      | 87694090  | c | g | 0.10  | 0.03 | 4.49E-05 | 0.10  | 0.03 | 1.05E-04 |
| 13 | rs1855480      | 87699547  | a | g | 0.10  | 0.03 | 4.49E-05 | 0.10  | 0.03 | 1.05E-04 |
| 19 | rs1236716      | 44640929  | a | g | 0.08  | 0.02 | 4.49E-05 | 0.08  | 0.02 | 7.97E-05 |
| 2  | rs821485       | 238966807 | a | g | 0.09  | 0.02 | 4.51E-05 | 0.08  | 0.02 | 6.82E-05 |
| 8  | rs10808367     | 101810651 | c | g | 0.14  | 0.03 | 4.54E-05 | 0.14  | 0.03 | 4.54E-05 |
| 5  | rs270188       | 5124149   | a | g | 0.09  | 0.02 | 4.55E-05 | 0.09  | 0.02 | 5.96E-05 |
| 3  | rs9832693      | 72158910  | a | g | 0.07  | 0.02 | 4.55E-05 | 0.07  | 0.02 | 1.04E-05 |
| 11 | rs11041820     | 8251438   | a | g | 0.07  | 0.02 | 4.55E-05 | 0.07  | 0.02 | 2.31E-05 |
| 13 | chr13:87703847 | 87703847  | a | g | -0.10 | 0.03 | 4.56E-05 | -0.10 | 0.03 | 1.09E-04 |
| 1  | rs58267302     | 30731997  | t | c | 0.10  | 0.02 | 4.56E-05 | 0.09  | 0.02 | 5.75E-05 |
| 13 | rs9524601      | 87758301  | a | t | -0.11 | 0.03 | 4.58E-05 | -0.10 | 0.03 | 1.06E-04 |
| 14 | rs6573140      | 57732994  | t | g | 0.14  | 0.03 | 4.59E-05 | 0.13  | 0.03 | 4.73E-05 |
| 13 | rs9524480      | 87724509  | t | g | 0.10  | 0.03 | 4.60E-05 | 0.10  | 0.03 | 1.11E-04 |
| 2  | rs2250045      | 238970862 | t | c | -0.09 | 0.02 | 4.60E-05 | -0.08 | 0.02 | 7.04E-05 |
| 9  | rs2779569      | 101280384 | t | c | -0.13 | 0.03 | 4.61E-05 | -0.12 | 0.03 | 1.57E-04 |

Supp table 4

|    |                |           |   |   |       |      |          |       |      |          |
|----|----------------|-----------|---|---|-------|------|----------|-------|------|----------|
| 9  | rs2779582      | 101287117 | t | c | 0.13  | 0.03 | 4.61E-05 | 0.12  | 0.03 | 1.56E-04 |
| 13 | rs9301969      | 87734174  | t | c | 0.10  | 0.03 | 4.61E-05 | 0.10  | 0.03 | 1.05E-04 |
| 13 | rs9516389      | 87716746  | t | g | 0.11  | 0.03 | 4.62E-05 | 0.10  | 0.03 | 1.10E-04 |
| 19 | rs4429390      | 44598868  | t | g | -0.09 | 0.02 | 4.63E-05 | -0.08 | 0.02 | 1.44E-04 |
| 9  | rs2779576      | 101284552 | a | t | -0.13 | 0.03 | 4.64E-05 | -0.12 | 0.03 | 1.57E-04 |
| 9  | rs944760       | 101283741 | t | g | 0.13  | 0.03 | 4.64E-05 | 0.12  | 0.03 | 1.58E-04 |
| 13 | rs9584218      | 87722275  | c | g | -0.10 | 0.03 | 4.64E-05 | -0.10 | 0.03 | 1.12E-04 |
| 19 | rs17699089     | 11343795  | a | g | 0.10  | 0.03 | 4.66E-05 | 0.09  | 0.02 | 1.40E-04 |
| 7  | rs6946056      | 131870597 | a | c | 0.07  | 0.02 | 4.67E-05 | 0.06  | 0.02 | 1.47E-04 |
| 13 | rs9524579      | 87748687  | c | g | 0.11  | 0.03 | 4.69E-05 | 0.10  | 0.03 | 1.09E-04 |
| 19 | rs4550576      | 44578447  | a | g | -0.10 | 0.02 | 4.70E-05 | -0.09 | 0.02 | 1.68E-04 |
| 14 | rs10140993     | 57679457  | t | c | -0.09 | 0.02 | 4.72E-05 | -0.09 | 0.02 | 4.16E-05 |
| 19 | rs3746319      | 44612231  | a | g | -0.08 | 0.02 | 4.72E-05 | -0.08 | 0.02 | 1.24E-04 |
| 19 | rs10406335     | 44633953  | a | g | 0.09  | 0.02 | 4.73E-05 | 0.09  | 0.02 | 1.44E-04 |
| 19 | rs2284981      | 44633558  | c | g | 0.08  | 0.02 | 4.74E-05 | 0.08  | 0.02 | 8.45E-05 |
| 13 | chr13:87698746 | 87698746  | a | g | 0.10  | 0.03 | 4.75E-05 | 0.10  | 0.03 | 1.14E-04 |
| 13 | rs17614444     | 87703218  | t | c | 0.10  | 0.03 | 4.76E-05 | 0.10  | 0.03 | 1.14E-04 |
| 13 | rs9301944      | 87706345  | a | g | -0.10 | 0.03 | 4.76E-05 | -0.10 | 0.03 | 1.14E-04 |
| 13 | rs9524369      | 87705768  | t | c | -0.11 | 0.03 | 4.77E-05 | -0.10 | 0.03 | 1.11E-04 |
| 13 | rs9584217      | 87722164  | c | g | 0.10  | 0.03 | 4.78E-05 | 0.10  | 0.03 | 1.14E-04 |
| 19 | rs1236715      | 44639558  | c | g | -0.08 | 0.02 | 4.79E-05 | -0.08 | 0.02 | 8.45E-05 |
| 1  | rs12035297     | 230238821 | t | c | 0.07  | 0.02 | 4.82E-05 | 0.07  | 0.02 | 7.69E-05 |
| 9  | rs2641970      | 581453    | t | c | 0.08  | 0.02 | 4.82E-05 | 0.08  | 0.02 | 1.16E-04 |
| 13 | rs9516375      | 87710008  | t | c | -0.10 | 0.03 | 4.83E-05 | -0.10 | 0.03 | 1.14E-04 |
| 14 | rs10137456     | 57669003  | t | c | 0.10  | 0.02 | 4.85E-05 | 0.09  | 0.02 | 4.24E-05 |
| 8  | rs7835342      | 82698092  | a | g | -0.07 | 0.02 | 4.85E-05 | -0.07 | 0.02 | 3.08E-05 |
| 13 | rs1568547      | 87748914  | t | c | -0.11 | 0.03 | 4.85E-05 | -0.10 | 0.03 | 1.13E-04 |
| 13 | chr13:87716983 | 87716983  | a | g | 0.10  | 0.03 | 4.86E-05 | 0.10  | 0.03 | 1.13E-04 |
| 13 | rs9516391      | 87717263  | a | c | 0.10  | 0.03 | 4.86E-05 | 0.10  | 0.03 | 1.13E-04 |
| 13 | rs9524441      | 87718188  | a | g | 0.10  | 0.03 | 4.86E-05 | 0.10  | 0.03 | 1.13E-04 |
| 13 | rs9516386      | 87715737  | c | g | 0.10  | 0.03 | 4.86E-05 | 0.10  | 0.03 | 1.15E-04 |
| 19 | rs7249702      | 14138212  | a | g | 0.08  | 0.02 | 4.87E-05 | 0.08  | 0.02 | 4.31E-05 |
| 13 | chr13:87708756 | 87708756  | t | c | -0.10 | 0.03 | 4.88E-05 | -0.10 | 0.03 | 1.17E-04 |
| 6  | rs9480703      | 107190424 | a | c | 0.14  | 0.03 | 4.89E-05 | 0.13  | 0.03 | 4.80E-05 |
| 3  | rs9836943      | 72159035  | t | g | 0.07  | 0.02 | 4.92E-05 | 0.07  | 0.02 | 1.11E-05 |
| 13 | rs9524571      | 87747466  | c | g | -0.10 | 0.03 | 4.92E-05 | -0.10 | 0.03 | 1.15E-04 |
| 13 | rs9524572      | 87747506  | a | t | -0.10 | 0.03 | 4.92E-05 | -0.10 | 0.03 | 1.15E-04 |
| 15 | rs12905964     | 84179115  | t | c | -0.07 | 0.02 | 4.93E-05 | -0.06 | 0.02 | 8.63E-05 |
| 13 | rs7328552      | 87707942  | t | g | -0.10 | 0.03 | 4.93E-05 | -0.10 | 0.03 | 1.15E-04 |
| 19 | rs57895932     | 44580758  | t | c | -0.10 | 0.02 | 4.93E-05 | -0.09 | 0.02 | 1.73E-04 |
| 13 | rs7323320      | 87737847  | a | g | 0.11  | 0.03 | 4.93E-05 | 0.10  | 0.03 | 1.15E-04 |
| 13 | rs9524431      | 87716228  | a | g | 0.10  | 0.03 | 4.94E-05 | 0.10  | 0.03 | 1.18E-04 |
| 7  | rs10277421     | 131859077 | t | c | 0.07  | 0.02 | 4.95E-05 | 0.07  | 0.02 | 8.45E-05 |
| 8  | rs596215       | 2860515   | a | g | 0.11  | 0.03 | 4.95E-05 | 0.11  | 0.03 | 5.94E-05 |
| 13 | chr13:87711760 | 87711760  | a | g | -0.10 | 0.03 | 4.96E-05 | -0.10 | 0.03 | 1.16E-04 |
| 13 | rs9524595      | 87755078  | a | c | -0.11 | 0.03 | 4.97E-05 | -0.10 | 0.03 | 1.13E-04 |
| 19 | rs2284980      | 44633474  | t | c | -0.09 | 0.02 | 4.99E-05 | -0.09 | 0.02 | 1.46E-04 |
| 13 | rs9524405      | 87713434  | t | c | 0.10  | 0.03 | 5.00E-05 | 0.10  | 0.03 | 1.19E-04 |
| 2  | rs2540096      | 59756854  | t | c | 0.07  | 0.02 | 5.01E-05 | 0.07  | 0.02 | 5.01E-05 |
| 13 | rs13378851     | 87753220  | t | c | -0.10 | 0.03 | 5.04E-05 | -0.10 | 0.03 | 1.18E-04 |
| 13 | rs1568548      | 87749053  | c | g | -0.10 | 0.03 | 5.04E-05 | -0.10 | 0.03 | 1.18E-04 |
| 13 | rs1568549      | 87749218  | a | t | 0.10  | 0.03 | 5.04E-05 | 0.10  | 0.03 | 1.18E-04 |
| 13 | rs9301987      | 87751111  | a | g | 0.10  | 0.03 | 5.04E-05 | 0.10  | 0.03 | 1.18E-04 |
| 13 | rs9301988      | 87752517  | a | g | -0.10 | 0.03 | 5.04E-05 | -0.10 | 0.03 | 1.18E-04 |
| 13 | rs9516456      | 87750178  | a | g | -0.10 | 0.03 | 5.04E-05 | -0.10 | 0.03 | 1.18E-04 |
| 13 | rs9524576      | 87748327  | a | g | -0.10 | 0.03 | 5.04E-05 | -0.10 | 0.03 | 1.18E-04 |
| 13 | rs9301984      | 87746367  | t | c | 0.10  | 0.03 | 5.06E-05 | 0.10  | 0.03 | 1.19E-04 |
| 13 | rs9516447      | 87746085  | a | t | -0.10 | 0.03 | 5.06E-05 | -0.10 | 0.03 | 1.19E-04 |

Supp table 4

|    |                |           |   |   |       |      |          |       |      |          |
|----|----------------|-----------|---|---|-------|------|----------|-------|------|----------|
| 3  | rs3732543      | 125870596 | t | g | -0.22 | 0.06 | 5.07E-05 | -0.06 | 0.04 | 1.23E-01 |
| 8  | rs6415652      | 82702257  | a | g | 0.07  | 0.02 | 5.09E-05 | 0.07  | 0.02 | 3.66E-05 |
| 13 | chr13:87711410 | 87711410  | t | c | 0.10  | 0.03 | 5.09E-05 | 0.10  | 0.03 | 1.20E-04 |
| 13 | rs9301985      | 87746522  | a | g | 0.10  | 0.03 | 5.10E-05 | 0.10  | 0.03 | 1.19E-04 |
| 13 | rs9301986      | 87746779  | t | c | -0.10 | 0.03 | 5.10E-05 | -0.10 | 0.03 | 1.19E-04 |
| 13 | rs9524574      | 87748116  | a | c | 0.10  | 0.03 | 5.10E-05 | 0.10  | 0.03 | 1.19E-04 |
| 7  | rs7787927      | 107404360 | a | c | -0.08 | 0.02 | 5.11E-05 | -0.07 | 0.02 | 6.22E-05 |
| 4  | rs5743604      | 38801285  | a | g | 0.07  | 0.02 | 5.11E-05 | 0.08  | 0.02 | 4.09E-06 |
| 8  | rs4739627      | 82734657  | a | g | -0.07 | 0.02 | 5.11E-05 | -0.07 | 0.02 | 3.00E-05 |
| 2  | rs887942       | 59775168  | c | g | 0.07  | 0.02 | 5.12E-05 | 0.07  | 0.02 | 2.61E-05 |
| 6  | chr6:149199522 | 149199522 | a | g | -0.10 | 0.02 | 5.12E-05 | -0.09 | 0.02 | 6.49E-05 |
| 8  | rs1054078      | 82712153  | a | g | -0.07 | 0.02 | 5.13E-05 | -0.07 | 0.02 | 3.02E-05 |
| 2  | rs2326009      | 238993857 | a | c | -0.09 | 0.02 | 5.15E-05 | -0.08 | 0.02 | 8.90E-05 |
| 20 | rs6070956      | 58384810  | t | c | 0.07  | 0.02 | 5.15E-05 | 0.07  | 0.02 | 1.58E-05 |
| 11 | rs2290451      | 8248440   | c | g | -0.07 | 0.02 | 5.16E-05 | -0.08 | 0.02 | 2.22E-05 |
| 14 | chr14:57684250 | 57684250  | t | c | 0.10  | 0.02 | 5.17E-05 | 0.10  | 0.02 | 4.58E-05 |
| 6  | rs6923822      | 128839470 | a | g | 0.09  | 0.02 | 5.18E-05 | 0.08  | 0.02 | 9.11E-05 |
| 19 | rs2061332      | 44613661  | a | c | -0.08 | 0.02 | 5.18E-05 | -0.08 | 0.02 | 1.20E-04 |
| 2  | rs10195005     | 59771640  | a | g | 0.07  | 0.02 | 5.22E-05 | 0.07  | 0.02 | 4.64E-05 |
| 6  | rs7753899      | 107192081 | t | c | -0.14 | 0.03 | 5.22E-05 | -0.13 | 0.03 | 5.13E-05 |
| 13 | rs9523884      | 87584738  | a | c | -0.10 | 0.03 | 5.24E-05 | -0.10 | 0.03 | 1.63E-04 |
| 13 | chr13:87708856 | 87708856  | t | c | -0.10 | 0.03 | 5.26E-05 | -0.10 | 0.03 | 1.22E-04 |
| 13 | rs9524428      | 87715129  | a | t | -0.10 | 0.03 | 5.26E-05 | -0.10 | 0.03 | 1.25E-04 |
| 13 | rs9524429      | 87715193  | t | c | -0.10 | 0.03 | 5.26E-05 | -0.10 | 0.03 | 1.22E-04 |
| 14 | rs4569162      | 57681780  | t | c | 0.10  | 0.02 | 5.26E-05 | 0.09  | 0.02 | 4.72E-05 |
| 9  | rs35094112     | 14483581  | a | g | 0.10  | 0.03 | 5.27E-05 | 0.11  | 0.03 | 3.58E-05 |
| 8  | rs7834555      | 82697625  | a | g | -0.07 | 0.02 | 5.28E-05 | -0.07 | 0.02 | 3.43E-05 |
| 1  | rs12724775     | 230247123 | a | g | 0.07  | 0.02 | 5.28E-05 | 0.07  | 0.02 | 9.70E-05 |
| 9  | rs35950138     | 14483143  | t | c | 0.10  | 0.03 | 5.28E-05 | 0.10  | 0.03 | 3.59E-05 |
| 8  | rs6415653      | 82702536  | a | g | -0.07 | 0.02 | 5.29E-05 | -0.07 | 0.02 | 3.42E-05 |
| 8  | rs3847153      | 101813156 | a | g | 0.14  | 0.03 | 5.30E-05 | 0.14  | 0.03 | 5.46E-05 |
| 9  | rs13299701     | 14482456  | t | c | 0.10  | 0.03 | 5.34E-05 | 0.10  | 0.03 | 3.63E-05 |
| 2  | rs2249077      | 238990985 | t | c | 0.09  | 0.02 | 5.35E-05 | 0.08  | 0.02 | 9.20E-05 |
| 2  | rs2540087      | 59762594  | a | c | -0.07 | 0.02 | 5.38E-05 | -0.07 | 0.02 | 5.34E-05 |
| 2  | rs2540089      | 59762371  | t | c | -0.07 | 0.02 | 5.38E-05 | -0.07 | 0.02 | 5.45E-05 |
| 2  | rs1595823      | 198891799 | t | c | -0.06 | 0.02 | 5.39E-05 | -0.07 | 0.02 | 1.62E-05 |
| 19 | rs12463177     | 11341680  | c | g | -0.10 | 0.03 | 5.39E-05 | -0.10 | 0.03 | 1.55E-04 |
| 9  | rs2779581      | 101286985 | t | c | -0.13 | 0.03 | 5.39E-05 | -0.12 | 0.03 | 1.81E-04 |
| 9  | rs13285597     | 14483654  | t | c | 0.10  | 0.03 | 5.40E-05 | 0.10  | 0.03 | 3.72E-05 |
| 13 | rs9516430      | 87738464  | t | g | 0.10  | 0.03 | 5.41E-05 | 0.10  | 0.03 | 1.23E-04 |
| 13 | rs9523907      | 87593562  | a | g | -0.10 | 0.03 | 5.41E-05 | -0.10 | 0.03 | 1.68E-04 |
| 19 | rs3810308      | 11333596  | t | c | 0.10  | 0.03 | 5.42E-05 | 0.09  | 0.02 | 1.76E-04 |
| 13 | rs9524600      | 87758209  | a | g | 0.10  | 0.03 | 5.43E-05 | 0.10  | 0.03 | 1.20E-04 |
| 13 | rs9301980      | 87744027  | t | g | 0.10  | 0.03 | 5.44E-05 | 0.10  | 0.03 | 1.27E-04 |
| 13 | rs9301982      | 87744305  | t | c | 0.10  | 0.03 | 5.44E-05 | 0.10  | 0.03 | 1.27E-04 |
| 13 | rs9516446      | 87745792  | a | c | 0.10  | 0.03 | 5.44E-05 | 0.10  | 0.03 | 1.27E-04 |
| 7  | rs7808586      | 131859496 | a | g | -0.07 | 0.02 | 5.44E-05 | -0.06 | 0.02 | 9.35E-05 |
| 9  | rs2804275      | 580319    | a | g | 0.08  | 0.02 | 5.44E-05 | 0.07  | 0.02 | 1.49E-04 |
| 9  | rs2361089      | 580868    | t | c | 0.08  | 0.02 | 5.46E-05 | 0.07  | 0.02 | 1.54E-04 |
| 13 | rs9516435      | 87743576  | a | t | 0.10  | 0.03 | 5.46E-05 | 0.10  | 0.03 | 1.24E-04 |
| 1  | rs12751815     | 230242580 | t | c | 0.07  | 0.02 | 5.49E-05 | 0.07  | 0.02 | 1.01E-04 |
| 9  | rs2641973      | 580171    | a | t | -0.08 | 0.02 | 5.50E-05 | -0.07 | 0.02 | 1.51E-04 |
| 19 | rs4803681      | 44609485  | a | g | 0.08  | 0.02 | 5.52E-05 | 0.08  | 0.02 | 1.43E-04 |
| 2  | rs4663836      | 238987185 | a | t | 0.09  | 0.02 | 5.53E-05 | 0.08  | 0.02 | 9.60E-05 |
| 19 | rs2061333      | 44614208  | t | c | 0.08  | 0.02 | 5.53E-05 | 0.08  | 0.02 | 1.37E-04 |
| 13 | rs2880547      | 87740302  | t | c | 0.10  | 0.03 | 5.54E-05 | 0.10  | 0.03 | 1.29E-04 |
| 13 | rs6650324      | 87740425  | t | c | 0.10  | 0.03 | 5.54E-05 | 0.10  | 0.03 | 1.29E-04 |
| 13 | rs9516432      | 87742283  | a | g | -0.10 | 0.03 | 5.54E-05 | -0.10 | 0.03 | 1.29E-04 |

Supp table 4

|    |                |           |   |   |       |      |          |       |      |          |
|----|----------------|-----------|---|---|-------|------|----------|-------|------|----------|
| 13 | rs9516433      | 87742869  | t | c | 0.10  | 0.03 | 5.54E-05 | 0.10  | 0.03 | 1.29E-04 |
| 13 | rs9524535      | 87741032  | a | g | 0.10  | 0.03 | 5.54E-05 | 0.10  | 0.03 | 1.29E-04 |
| 13 | rs9524536      | 87741078  | t | c | 0.10  | 0.03 | 5.54E-05 | 0.10  | 0.03 | 1.29E-04 |
| 8  | chr8:82772037  | 82772037  | a | g | 0.07  | 0.02 | 5.54E-05 | 0.07  | 0.02 | 3.34E-05 |
| 8  | rs7825180      | 82723991  | a | t | 0.07  | 0.02 | 5.56E-05 | 0.07  | 0.02 | 3.17E-05 |
| 2  | rs2674046      | 59768141  | t | c | -0.07 | 0.02 | 5.58E-05 | -0.07 | 0.02 | 5.61E-05 |
| 8  | chr8:82754460  | 82754460  | c | g | 0.07  | 0.02 | 5.58E-05 | 0.07  | 0.02 | 3.26E-05 |
| 19 | rs7247578      | 14138147  | t | c | 0.09  | 0.02 | 5.62E-05 | 0.09  | 0.02 | 4.77E-05 |
| 2  | rs2592585      | 238979621 | t | c | 0.09  | 0.02 | 5.62E-05 | 0.08  | 0.02 | 9.57E-05 |
| 8  | rs10958045     | 82722994  | t | c | -0.07 | 0.02 | 5.64E-05 | -0.07 | 0.02 | 3.20E-05 |
| 8  | rs6473311      | 82726682  | a | g | 0.07  | 0.02 | 5.64E-05 | 0.07  | 0.02 | 3.20E-05 |
| 14 | chr14:20526239 | 20526239  | t | c | -0.12 | 0.03 | 5.64E-05 | -0.13 | 0.03 | 3.10E-05 |
| 20 | rs6027132      | 58384451  | t | c | 0.07  | 0.02 | 5.65E-05 | 0.07  | 0.02 | 1.74E-05 |
| 13 | rs9516465      | 87756076  | a | c | 0.10  | 0.03 | 5.67E-05 | 0.10  | 0.03 | 1.43E-04 |
| 7  | rs13235830     | 35450900  | t | g | -0.07 | 0.02 | 5.69E-05 | -0.06 | 0.02 | 8.81E-05 |
| 13 | rs9524592      | 87754480  | a | g | 0.10  | 0.03 | 5.69E-05 | 0.10  | 0.03 | 1.30E-04 |
| 13 | rs9590055      | 87754380  | a | g | -0.10 | 0.03 | 5.69E-05 | -0.10 | 0.03 | 1.30E-04 |
| 19 | rs10413195     | 44634903  | a | g | -0.09 | 0.02 | 5.70E-05 | -0.08 | 0.02 | 2.58E-04 |
| 19 | rs3826815      | 11332505  | t | c | -0.10 | 0.03 | 5.77E-05 | -0.09 | 0.03 | 1.77E-04 |
| 9  | rs10975395     | 609829    | t | c | -0.08 | 0.02 | 5.78E-05 | -0.07 | 0.02 | 1.68E-04 |
| 19 | rs8099869      | 44623376  | t | c | 0.09  | 0.02 | 5.81E-05 | 0.08  | 0.02 | 1.04E-04 |
| 11 | rs2290450      | 8248482   | t | c | 0.07  | 0.02 | 5.82E-05 | 0.08  | 0.02 | 2.52E-05 |
| 8  | rs13255262     | 82728024  | t | g | -0.07 | 0.02 | 5.83E-05 | -0.07 | 0.02 | 3.31E-05 |
| 8  | rs12544174     | 82731477  | a | g | 0.07  | 0.02 | 5.83E-05 | 0.07  | 0.02 | 3.38E-05 |
| 8  | rs1451995      | 82746123  | c | g | -0.07 | 0.02 | 5.83E-05 | -0.07 | 0.02 | 3.44E-05 |
| 4  | rs11939576     | 78761998  | a | g | -0.09 | 0.02 | 5.84E-05 | -0.09 | 0.02 | 6.99E-05 |
| 13 | rs9524539      | 87741128  | t | c | 0.10  | 0.03 | 5.85E-05 | 0.10  | 0.03 | 1.35E-04 |
| 8  | rs6473310      | 82707981  | a | g | -0.07 | 0.02 | 5.87E-05 | -0.07 | 0.02 | 3.42E-05 |
| 5  | rs4835803      | 121852531 | t | c | -0.10 | 0.02 | 5.87E-05 | -0.09 | 0.02 | 1.05E-04 |
| 4  | rs6834581      | 38788234  | t | c | 0.07  | 0.02 | 5.88E-05 | 0.08  | 0.02 | 8.18E-06 |
| 13 | chr13:87568542 | 87568542  | t | g | -0.10 | 0.03 | 5.89E-05 | -0.10 | 0.03 | 1.80E-04 |
| 16 | rs35569480     | 7155448   | a | g | -0.07 | 0.02 | 5.90E-05 | -0.06 | 0.02 | 6.40E-05 |
| 8  | rs2400540      | 82763948  | a | c | 0.07  | 0.02 | 5.91E-05 | 0.07  | 0.02 | 3.51E-05 |
| 9  | rs9409931      | 137342757 | t | c | 0.06  | 0.02 | 5.93E-05 | 0.06  | 0.02 | 1.05E-04 |
| 8  | rs7846521      | 82718107  | a | g | -0.07 | 0.02 | 5.93E-05 | -0.07 | 0.02 | 3.38E-05 |
| 13 | rs9524427      | 87714690  | a | g | -0.10 | 0.03 | 5.93E-05 | -0.10 | 0.03 | 1.32E-04 |
| 19 | rs4508518      | 44611420  | a | g | -0.08 | 0.02 | 5.94E-05 | -0.08 | 0.02 | 1.45E-04 |
| 4  | rs4833095      | 38799710  | t | c | 0.07  | 0.02 | 5.94E-05 | 0.08  | 0.02 | 5.55E-06 |
| 7  | rs13226711     | 107395342 | a | g | -0.07 | 0.02 | 5.95E-05 | -0.07 | 0.02 | 6.59E-05 |
| 19 | rs3172         | 44609846  | c | g | -0.08 | 0.02 | 5.97E-05 | -0.08 | 0.02 | 1.59E-04 |
| 21 | rs463877       | 22090256  | t | c | 0.10  | 0.02 | 6.00E-05 | 0.10  | 0.02 | 5.80E-05 |
| 19 | rs11666432     | 44576302  | t | c | 0.10  | 0.02 | 6.02E-05 | 0.09  | 0.02 | 2.04E-04 |
| 19 | rs7252213      | 44576863  | a | g | 0.10  | 0.02 | 6.02E-05 | 0.09  | 0.02 | 2.04E-04 |
| 15 | rs12591074     | 81137866  | t | c | -0.08 | 0.02 | 6.03E-05 | -0.08 | 0.02 | 7.40E-05 |
| 8  | rs28390260     | 82769175  | a | t | 0.07  | 0.02 | 6.04E-05 | 0.07  | 0.02 | 3.51E-05 |
| 8  | rs7839178      | 82763479  | a | g | 0.07  | 0.02 | 6.04E-05 | 0.07  | 0.02 | 3.51E-05 |
| 13 | rs9516428      | 87736353  | t | c | 0.10  | 0.03 | 6.04E-05 | 0.10  | 0.03 | 1.40E-04 |
| 13 | rs884093       | 87745110  | t | c | 0.10  | 0.03 | 6.06E-05 | 0.10  | 0.03 | 1.36E-04 |
| 7  | rs6956243      | 107388911 | t | c | 0.07  | 0.02 | 6.06E-05 | 0.07  | 0.02 | 7.24E-05 |
| 8  | rs6473309      | 82707880  | a | g | -0.07 | 0.02 | 6.07E-05 | -0.07 | 0.02 | 3.54E-05 |
| 14 | rs10141811     | 57730748  | t | c | -0.14 | 0.03 | 6.08E-05 | -0.13 | 0.03 | 6.01E-05 |
| 7  | rs13231387     | 107389979 | t | c | -0.07 | 0.02 | 6.09E-05 | -0.07 | 0.02 | 7.27E-05 |
| 13 | chr13:87736657 | 87736657  | a | g | -0.10 | 0.03 | 6.10E-05 | -0.10 | 0.03 | 1.38E-04 |
| 4  | rs2406485      | 138112990 | t | c | 0.07  | 0.02 | 6.11E-05 | 0.07  | 0.02 | 5.21E-05 |
| 19 | rs2356750      | 44625909  | a | g | 0.10  | 0.02 | 6.15E-05 | 0.09  | 0.02 | 2.00E-04 |
| 1  | rs12732392     | 230244966 | a | g | -0.07 | 0.02 | 6.16E-05 | -0.07 | 0.02 | 1.09E-04 |
| 2  | rs7591078      | 239005014 | c | g | -0.09 | 0.02 | 6.18E-05 | -0.08 | 0.02 | 1.06E-04 |
| 13 | rs9523748      | 87549014  | t | c | -0.10 | 0.03 | 6.18E-05 | -0.09 | 0.03 | 1.93E-04 |



Supp table 4

|    |                |           |   |   |       |      |          |       |      |          |
|----|----------------|-----------|---|---|-------|------|----------|-------|------|----------|
| 2  | rs2264166      | 238981301 | a | c | -0.09 | 0.02 | 6.19E-05 | -0.08 | 0.02 | 1.04E-04 |
| 19 | rs324119       | 52899556  | t | c | -0.11 | 0.03 | 6.21E-05 | -0.10 | 0.03 | 5.08E-04 |
| 19 | rs4803913      | 46768753  | a | g | 0.06  | 0.02 | 6.23E-05 | 0.07  | 0.02 | 1.94E-05 |
| 1  | rs910821       | 230232241 | a | t | 0.07  | 0.02 | 6.24E-05 | 0.07  | 0.02 | 1.06E-04 |
| 13 | chr13:87561327 | 87561327  | c | g | 0.10  | 0.03 | 6.25E-05 | 0.09  | 0.03 | 1.97E-04 |
| 13 | rs9523806      | 87562029  | a | g | 0.10  | 0.03 | 6.25E-05 | 0.09  | 0.03 | 1.97E-04 |
| 13 | rs9523810      | 87566383  | a | c | 0.10  | 0.03 | 6.25E-05 | 0.09  | 0.03 | 1.97E-04 |
| 13 | rs9523867      | 87579486  | a | g | -0.10 | 0.03 | 6.25E-05 | -0.09 | 0.03 | 1.97E-04 |
| 5  | rs4836019      | 121853417 | a | t | 0.10  | 0.02 | 6.26E-05 | 0.09  | 0.02 | 1.14E-04 |
| 14 | rs8003535      | 57672004  | t | g | -0.13 | 0.03 | 6.26E-05 | -0.13 | 0.03 | 6.05E-05 |
| 19 | rs7251868      | 44628357  | a | g | 0.10  | 0.02 | 6.26E-05 | 0.09  | 0.02 | 2.15E-04 |
| 2  | rs2674047      | 59768685  | a | t | -0.07 | 0.02 | 6.31E-05 | -0.07 | 0.02 | 6.60E-05 |
| 2  | rs13033964     | 239005586 | a | g | 0.09  | 0.02 | 6.34E-05 | 0.08  | 0.02 | 1.10E-04 |
| 5  | rs386450       | 14106136  | a | g | 0.08  | 0.02 | 6.34E-05 | 0.08  | 0.02 | 5.59E-05 |
| 13 | rs9584247      | 87757303  | c | g | -0.10 | 0.03 | 6.34E-05 | -0.10 | 0.03 | 1.54E-04 |
| 2  | rs62196004     | 239006314 | a | g | 0.09  | 0.02 | 6.35E-05 | 0.08  | 0.02 | 1.07E-04 |
| 5  | rs4145648      | 103176234 | t | c | -0.10 | 0.03 | 6.36E-05 | -0.10 | 0.03 | 9.68E-05 |
| 8  | rs12676336     | 82771008  | t | c | -0.07 | 0.02 | 6.36E-05 | -0.07 | 0.02 | 3.77E-05 |
| 8  | rs6473308      | 82707708  | a | g | 0.07  | 0.02 | 6.37E-05 | 0.07  | 0.02 | 3.66E-05 |
| 2  | rs2540099      | 59753741  | t | c | -0.07 | 0.02 | 6.38E-05 | -0.07 | 0.02 | 6.37E-05 |
| 13 | rs9524593      | 87754623  | t | g | -0.10 | 0.03 | 6.39E-05 | -0.10 | 0.03 | 1.45E-04 |
| 2  | rs2674041      | 59757501  | a | g | -0.07 | 0.02 | 6.41E-05 | -0.07 | 0.02 | 6.63E-05 |
| 2  | rs2674061      | 59753331  | t | c | -0.07 | 0.02 | 6.43E-05 | -0.07 | 0.02 | 6.07E-05 |
| 8  | rs3843552      | 101813268 | t | g | -0.14 | 0.04 | 6.44E-05 | -0.14 | 0.03 | 6.61E-05 |
| 8  | rs3847154      | 101813178 | t | c | -0.14 | 0.04 | 6.44E-05 | -0.14 | 0.03 | 6.61E-05 |
| 20 | rs6048354      | 22780826  | a | g | 0.06  | 0.02 | 6.45E-05 | 0.07  | 0.02 | 1.22E-05 |
| 1  | rs10864699     | 230264607 | a | g | 0.07  | 0.02 | 6.47E-05 | 0.07  | 0.02 | 1.83E-04 |
| 2  | rs62197363     | 239028740 | t | c | -0.09 | 0.02 | 6.52E-05 | -0.08 | 0.02 | 9.99E-05 |
| 2  | rs2674050      | 59769317  | t | c | -0.07 | 0.02 | 6.53E-05 | -0.07 | 0.02 | 6.85E-05 |
| 7  | rs4730258      | 107396232 | a | g | 0.07  | 0.02 | 6.60E-05 | 0.07  | 0.02 | 7.57E-05 |
| 16 | rs11641255     | 83157143  | c | g | -0.07 | 0.02 | 6.66E-05 | -0.07 | 0.02 | 4.82E-05 |
| 14 | rs716690       | 57728652  | t | c | -0.14 | 0.03 | 6.72E-05 | -0.14 | 0.03 | 6.39E-05 |
| 2  | rs2674079      | 59771479  | a | c | 0.07  | 0.02 | 6.73E-05 | 0.07  | 0.02 | 6.42E-05 |
| 14 | rs7147218      | 57722057  | t | g | 0.13  | 0.03 | 6.74E-05 | 0.13  | 0.03 | 6.81E-05 |
| 2  | rs2540083      | 59769150  | a | g | -0.07 | 0.02 | 6.75E-05 | -0.07 | 0.02 | 6.68E-05 |
| 9  | rs2804276      | 580725    | t | c | -0.08 | 0.02 | 6.77E-05 | -0.07 | 0.02 | 1.86E-04 |
| 2  | rs56093216     | 59753972  | t | c | 0.07  | 0.02 | 6.77E-05 | 0.07  | 0.02 | 6.78E-05 |
| 14 | rs11850616     | 57731973  | t | c | -0.14 | 0.03 | 6.78E-05 | -0.13 | 0.03 | 6.61E-05 |
| 2  | rs2540098      | 59753809  | t | c | -0.07 | 0.02 | 6.80E-05 | -0.07 | 0.02 | 6.53E-05 |
| 7  | rs12705421     | 107401429 | a | g | 0.07  | 0.02 | 6.82E-05 | 0.07  | 0.02 | 7.57E-05 |
| 3  | rs4646708      | 125873973 | t | c | -0.22 | 0.05 | 6.82E-05 | -0.05 | 0.04 | 1.31E-01 |
| 21 | rs170676       | 22096341  | c | g | -0.10 | 0.02 | 6.86E-05 | -0.10 | 0.02 | 7.50E-05 |
| 7  | rs12705579     | 78184222  | a | g | -0.13 | 0.03 | 6.88E-05 | -0.12 | 0.03 | 1.76E-04 |
| 2  | rs2540097      | 59755664  | a | g | 0.07  | 0.02 | 6.89E-05 | 0.07  | 0.02 | 6.62E-05 |
| 5  | rs366563       | 14106613  | t | g | -0.08 | 0.02 | 6.89E-05 | -0.08 | 0.02 | 7.45E-05 |
| 2  | rs2674048      | 59769012  | t | c | -0.07 | 0.02 | 6.97E-05 | -0.07 | 0.02 | 7.00E-05 |
| 3  | rs7615202      | 177223067 | t | c | -0.07 | 0.02 | 6.99E-05 | -0.07 | 0.02 | 1.20E-04 |
| 16 | rs28507852     | 83155325  | a | t | 0.07  | 0.02 | 7.01E-05 | 0.07  | 0.02 | 5.05E-05 |
| 14 | rs17093036     | 57734020  | c | g | 0.14  | 0.03 | 7.03E-05 | 0.13  | 0.03 | 7.16E-05 |
| 7  | rs10808154     | 107386396 | a | g | -0.07 | 0.02 | 7.04E-05 | -0.07 | 0.02 | 8.33E-05 |
| 2  | rs2674052      | 59770353  | t | g | 0.07  | 0.02 | 7.04E-05 | 0.07  | 0.02 | 6.82E-05 |
| 7  | rs2712210      | 107327852 | t | c | -0.07 | 0.02 | 7.07E-05 | -0.07 | 0.02 | 4.75E-05 |
| 15 | rs4984530      | 96806416  | t | c | 0.06  | 0.02 | 7.09E-05 | 0.06  | 0.02 | 6.37E-05 |
| 9  | rs7047247      | 613932    | a | g | 0.08  | 0.02 | 7.10E-05 | 0.07  | 0.02 | 2.05E-04 |
| 5  | rs13154169     | 119762605 | t | c | 0.12  | 0.03 | 7.11E-05 | 0.12  | 0.03 | 7.26E-05 |
| 14 | rs3742577      | 57672540  | t | c | 0.09  | 0.02 | 7.11E-05 | 0.09  | 0.02 | 6.19E-05 |
| 4  | rs4543123      | 38792524  | a | g | 0.07  | 0.02 | 7.14E-05 | 0.08  | 0.02 | 8.75E-06 |
| 15 | rs1668589      | 42363769  | a | g | 0.07  | 0.02 | 7.20E-05 | 0.07  | 0.02 | 2.18E-04 |

Supp table 4

|    |                |           |   |   |       |      |          |       |      |          |
|----|----------------|-----------|---|---|-------|------|----------|-------|------|----------|
| 19 | rs10413511     | 44634811  | a | g | 0.08  | 0.02 | 7.28E-05 | 0.08  | 0.02 | 1.37E-04 |
| 19 | rs4802208      | 44627912  | c | g | 0.08  | 0.02 | 7.31E-05 | 0.08  | 0.02 | 1.49E-04 |
| 2  | rs62196014     | 239010167 | c | g | -0.09 | 0.02 | 7.36E-05 | -0.08 | 0.02 | 1.15E-04 |
| 9  | rs4610808      | 614707    | c | g | -0.08 | 0.02 | 7.37E-05 | -0.07 | 0.02 | 2.21E-04 |
| 2  | rs2674067      | 59765684  | a | g | 0.07  | 0.02 | 7.42E-05 | 0.07  | 0.02 | 7.35E-05 |
| 2  | rs41264151     | 239007635 | a | g | 0.09  | 0.02 | 7.42E-05 | 0.08  | 0.02 | 1.21E-04 |
| 7  | rs13234350     | 35446584  | t | c | 0.07  | 0.02 | 7.46E-05 | 0.06  | 0.02 | 1.84E-04 |
| 7  | rs10280767     | 107393420 | a | c | -0.07 | 0.02 | 7.47E-05 | -0.07 | 0.02 | 4.60E-05 |
| 2  | chr2:169367116 | 169367116 | t | g | -0.07 | 0.02 | 7.48E-05 | -0.07 | 0.02 | 1.15E-04 |
| 2  | chr2:169367454 | 169367454 | c | g | 0.07  | 0.02 | 7.48E-05 | 0.07  | 0.02 | 1.15E-04 |
| 8  | rs10091077     | 82705464  | a | g | -0.07 | 0.02 | 7.49E-05 | -0.07 | 0.02 | 5.34E-05 |
| 14 | rs7141911      | 57672871  | a | g | 0.09  | 0.02 | 7.53E-05 | 0.09  | 0.02 | 6.08E-05 |
| 7  | rs13245734     | 78183552  | t | g | -0.13 | 0.03 | 7.58E-05 | -0.12 | 0.03 | 1.95E-04 |
| 2  | rs865380       | 238963998 | c | g | -0.09 | 0.02 | 7.59E-05 | -0.08 | 0.02 | 1.10E-04 |
| 13 | rs4129402      | 87808425  | t | c | 0.10  | 0.03 | 7.64E-05 | 0.09  | 0.03 | 1.71E-04 |
| 14 | rs6573137      | 57699904  | a | g | 0.13  | 0.03 | 7.69E-05 | 0.13  | 0.03 | 7.56E-05 |
| 2  | rs34049050     | 238998581 | a | g | -0.09 | 0.02 | 7.76E-05 | -0.08 | 0.02 | 1.27E-04 |
| 1  | rs59765152     | 30691817  | t | c | -0.08 | 0.02 | 7.77E-05 | -0.08 | 0.02 | 6.03E-05 |
| 13 | chr13:87819912 | 87819912  | a | g | 0.10  | 0.03 | 7.80E-05 | 0.09  | 0.03 | 1.71E-04 |
| 13 | rs9516565      | 87818537  | a | g | -0.10 | 0.03 | 7.80E-05 | -0.09 | 0.03 | 1.71E-04 |
| 13 | rs9516574      | 87820360  | c | g | 0.10  | 0.03 | 7.80E-05 | 0.09  | 0.03 | 1.71E-04 |
| 8  | rs6996005      | 107532927 | t | g | 0.07  | 0.02 | 7.80E-05 | 0.07  | 0.02 | 7.03E-05 |
| 16 | rs8048150      | 77846663  | t | c | 0.06  | 0.02 | 7.82E-05 | 0.06  | 0.02 | 2.01E-04 |
| 5  | rs814786       | 5119641   | t | c | 0.09  | 0.02 | 7.83E-05 | 0.09  | 0.02 | 1.05E-04 |
| 2  | chr2:138401519 | 138401519 | t | c | 0.10  | 0.03 | 7.84E-05 | 0.09  | 0.03 | 2.25E-04 |
| 2  | rs34878344     | 239010690 | a | c | 0.09  | 0.02 | 7.85E-05 | 0.08  | 0.02 | 1.27E-04 |
| 7  | rs10265205     | 107360123 | a | g | -0.07 | 0.02 | 7.86E-05 | -0.07 | 0.02 | 3.73E-05 |
| 7  | rs4730252      | 107361297 | t | c | -0.07 | 0.02 | 7.86E-05 | -0.07 | 0.02 | 3.97E-05 |
| 7  | rs4730253      | 107361436 | a | g | 0.07  | 0.02 | 7.86E-05 | 0.07  | 0.02 | 3.97E-05 |
| 4  | rs6828302      | 78740132  | c | g | -0.09 | 0.02 | 7.87E-05 | -0.09 | 0.02 | 1.02E-04 |
| 2  | rs2196172      | 198889893 | t | g | 0.06  | 0.02 | 7.88E-05 | 0.07  | 0.02 | 2.17E-05 |
| 8  | rs7834483      | 82704828  | a | g | -0.07 | 0.02 | 7.90E-05 | -0.07 | 0.02 | 5.65E-05 |
| 15 | rs10083616     | 27609171  | a | g | -0.08 | 0.02 | 7.93E-05 | -0.07 | 0.02 | 8.20E-05 |
| 7  | rs2188565      | 107391069 | a | g | -0.07 | 0.02 | 7.94E-05 | -0.07 | 0.02 | 4.99E-05 |
| 7  | rs2188873      | 20526266  | a | g | -0.07 | 0.02 | 7.99E-05 | -0.06 | 0.02 | 2.58E-04 |
| 4  | rs9996218      | 78750500  | a | g | 0.09  | 0.02 | 8.03E-05 | 0.08  | 0.02 | 9.87E-05 |
| 5  | rs860085       | 5125333   | a | c | -0.09 | 0.02 | 8.05E-05 | -0.09 | 0.02 | 1.03E-04 |
| 1  | rs1038984      | 203058842 | a | g | 0.07  | 0.02 | 8.05E-05 | 0.06  | 0.02 | 3.32E-04 |
| 2  | rs878134       | 239016640 | t | g | 0.09  | 0.02 | 8.11E-05 | 0.08  | 0.02 | 1.28E-04 |
| 9  | rs2804308      | 607382    | c | g | -0.08 | 0.02 | 8.12E-05 | -0.07 | 0.02 | 2.30E-04 |
| 4  | rs2866688      | 78749042  | a | g | -0.09 | 0.02 | 8.12E-05 | -0.08 | 0.02 | 9.99E-05 |
| 2  | rs4663837      | 239013841 | t | c | 0.09  | 0.02 | 8.13E-05 | 0.08  | 0.02 | 1.31E-04 |
| 7  | rs2023712      | 107390287 | t | c | -0.07 | 0.02 | 8.19E-05 | -0.07 | 0.02 | 4.77E-05 |
| 2  | rs2262426      | 238984497 | a | g | -0.08 | 0.02 | 8.20E-05 | -0.08 | 0.02 | 1.33E-04 |
| 16 | rs929892       | 82232444  | a | g | -0.09 | 0.02 | 8.21E-05 | -0.09 | 0.02 | 1.82E-05 |
| 13 | rs9594332      | 40008960  | a | g | -0.08 | 0.02 | 8.24E-05 | -0.08 | 0.02 | 6.07E-05 |
| 14 | rs10133300     | 57722893  | t | g | -0.13 | 0.03 | 8.25E-05 | -0.13 | 0.03 | 7.99E-05 |
| 2  | rs721250       | 59777016  | t | c | 0.06  | 0.02 | 8.26E-05 | 0.07  | 0.02 | 2.94E-05 |
| 2  | rs2252822      | 238983267 | a | g | 0.08  | 0.02 | 8.28E-05 | 0.08  | 0.02 | 1.32E-04 |
| 2  | rs13025510     | 239017140 | a | g | 0.09  | 0.02 | 8.32E-05 | 0.08  | 0.02 | 1.33E-04 |
| 5  | rs814782       | 5120802   | a | g | -0.09 | 0.02 | 8.32E-05 | -0.09 | 0.02 | 1.07E-04 |
| 5  | rs1092985      | 5115509   | t | c | 0.09  | 0.02 | 8.32E-05 | 0.09  | 0.02 | 1.07E-04 |
| 2  | rs878133       | 239016933 | a | g | 0.09  | 0.02 | 8.33E-05 | 0.09  | 0.02 | 1.28E-04 |
| 15 | rs28668284     | 27609193  | a | g | -0.07 | 0.02 | 8.35E-05 | -0.07 | 0.02 | 7.89E-05 |
| 7  | rs2237679      | 107334026 | t | c | -0.07 | 0.02 | 8.36E-05 | -0.07 | 0.02 | 7.77E-05 |
| 16 | rs2967395      | 82233063  | c | g | -0.09 | 0.02 | 8.36E-05 | -0.09 | 0.02 | 1.93E-05 |
| 2  | rs821488       | 238963756 | t | c | 0.08  | 0.02 | 8.39E-05 | 0.08  | 0.02 | 1.28E-04 |
| 16 | rs2967391      | 82230392  | t | g | 0.09  | 0.02 | 8.40E-05 | 0.09  | 0.02 | 1.72E-05 |

Supp table 4

|    |                |           |   |   |       |      |          |       |      |          |
|----|----------------|-----------|---|---|-------|------|----------|-------|------|----------|
| 5  | rs270184       | 5124579   | t | c | 0.09  | 0.02 | 8.41E-05 | 0.09  | 0.02 | 1.08E-04 |
| 2  | rs2262425      | 238984129 | a | g | 0.08  | 0.02 | 8.41E-05 | 0.08  | 0.02 | 1.35E-04 |
| 16 | rs2911411      | 82231125  | a | g | -0.09 | 0.02 | 8.41E-05 | -0.10 | 0.02 | 1.75E-05 |
| 2  | rs13006807     | 239008542 | t | c | 0.08  | 0.02 | 8.44E-05 | 0.08  | 0.02 | 1.31E-04 |
| 4  | rs17002824     | 78759026  | c | g | 0.09  | 0.02 | 8.44E-05 | 0.08  | 0.02 | 1.05E-04 |
| 2  | rs10490045     | 40631355  | t | c | 0.07  | 0.02 | 8.45E-05 | 0.07  | 0.02 | 6.40E-05 |
| 14 | rs10145188     | 57667996  | t | g | -0.09 | 0.02 | 8.47E-05 | -0.09 | 0.02 | 7.46E-05 |
| 14 | rs10130359     | 57716393  | t | c | -0.14 | 0.03 | 8.49E-05 | -0.13 | 0.03 | 8.65E-05 |
| 1  | rs7541570      | 230265342 | t | c | -0.07 | 0.02 | 8.51E-05 | -0.06 | 0.02 | 2.44E-04 |
| 2  | rs7601010      | 238982773 | t | c | -0.08 | 0.02 | 8.52E-05 | -0.08 | 0.02 | 1.44E-04 |
| 2  | rs2248623      | 238994828 | t | g | 0.08  | 0.02 | 8.52E-05 | 0.08  | 0.02 | 1.41E-04 |
| 2  | rs2592583      | 238995760 | t | g | -0.08 | 0.02 | 8.52E-05 | -0.08 | 0.02 | 1.43E-04 |
| 3  | rs6443673      | 179566283 | t | c | 0.07  | 0.02 | 8.57E-05 | 0.07  | 0.02 | 5.19E-05 |
| 7  | rs2157949      | 107369536 | a | g | -0.07 | 0.02 | 8.60E-05 | -0.07 | 0.02 | 6.12E-05 |
| 1  | rs58592594     | 203058476 | t | c | 0.07  | 0.02 | 8.61E-05 | 0.06  | 0.02 | 3.64E-04 |
| 15 | rs9707971      | 27608150  | a | g | 0.07  | 0.02 | 8.62E-05 | 0.07  | 0.02 | 8.29E-05 |
| 21 | rs2832278      | 30611490  | a | g | -0.10 | 0.02 | 8.64E-05 | -0.08 | 0.02 | 6.23E-04 |
| 7  | rs7782475      | 107386251 | t | c | -0.07 | 0.02 | 8.65E-05 | -0.07 | 0.02 | 9.38E-05 |
| 9  | rs13290610     | 30460547  | a | g | -0.14 | 0.03 | 8.66E-05 | -0.13 | 0.03 | 2.20E-04 |
| 1  | rs13375139     | 30691713  | t | c | -0.08 | 0.02 | 8.68E-05 | -0.08 | 0.02 | 6.94E-05 |
| 14 | rs6573135      | 57664374  | c | g | -0.09 | 0.02 | 8.69E-05 | -0.09 | 0.02 | 7.97E-05 |
| 5  | chr5:103177710 | 103177710 | t | c | -0.11 | 0.03 | 8.74E-05 | -0.10 | 0.03 | 1.38E-04 |
| 13 | rs7317775      | 40014918  | a | t | -0.08 | 0.02 | 8.74E-05 | -0.08 | 0.02 | 5.60E-05 |
| 14 | rs10135064     | 57668859  | t | g | 0.09  | 0.02 | 8.74E-05 | 0.09  | 0.02 | 7.61E-05 |
| 14 | rs1961293      | 57665079  | a | g | -0.09 | 0.02 | 8.76E-05 | -0.09 | 0.02 | 7.83E-05 |
| 3  | rs7640024      | 179568940 | a | g | 0.06  | 0.02 | 8.78E-05 | 0.07  | 0.02 | 4.54E-05 |
| 14 | rs9323304      | 57712482  | a | c | 0.14  | 0.03 | 8.81E-05 | 0.13  | 0.03 | 8.78E-05 |
| 10 | rs11013643     | 23968383  | a | g | 0.12  | 0.03 | 8.83E-05 | 0.11  | 0.03 | 2.57E-04 |
| 10 | rs11013645     | 23969208  | a | g | 0.12  | 0.03 | 8.83E-05 | 0.11  | 0.03 | 2.57E-04 |
| 14 | rs2881345      | 57667723  | a | c | -0.09 | 0.02 | 8.85E-05 | -0.09 | 0.02 | 7.70E-05 |
| 2  | rs4663285      | 239014834 | a | g | 0.09  | 0.02 | 8.87E-05 | 0.08  | 0.02 | 1.39E-04 |
| 5  | rs656208       | 14105848  | t | c | -0.08 | 0.02 | 8.87E-05 | -0.08 | 0.02 | 8.39E-05 |
| 14 | rs10135962     | 57665707  | c | g | 0.10  | 0.02 | 8.91E-05 | 0.10  | 0.02 | 8.16E-05 |
| 4  | rs2102116      | 78672168  | t | c | -0.09 | 0.02 | 8.92E-05 | -0.08 | 0.02 | 1.09E-04 |
| 14 | rs10498486     | 57759392  | t | c | -0.14 | 0.03 | 8.92E-05 | -0.13 | 0.03 | 9.88E-05 |
| 9  | rs1962203      | 613215    | a | g | -0.08 | 0.02 | 8.95E-05 | -0.07 | 0.02 | 2.58E-04 |
| 14 | rs10136042     | 57665761  | a | c | -0.09 | 0.02 | 8.96E-05 | -0.09 | 0.02 | 7.90E-05 |
| 14 | rs2078519      | 57665499  | a | g | 0.09  | 0.02 | 8.96E-05 | 0.09  | 0.02 | 7.90E-05 |
| 2  | rs2215906      | 59775565  | t | c | 0.06  | 0.02 | 9.02E-05 | 0.07  | 0.02 | 3.16E-05 |
| 2  | chr2:139256038 | 139256038 | a | t | 0.08  | 0.02 | 9.03E-05 | 0.07  | 0.02 | 1.42E-04 |
| 14 | rs10147790     | 57693036  | a | t | -0.14 | 0.04 | 9.05E-05 | -0.14 | 0.04 | 8.53E-05 |
| 2  | rs6755573      | 238895612 | a | g | -0.08 | 0.02 | 9.05E-05 | -0.08 | 0.02 | 1.38E-04 |
| 9  | rs7020705      | 614803    | c | g | 0.08  | 0.02 | 9.08E-05 | 0.07  | 0.02 | 2.67E-04 |
| 7  | rs1004584      | 35470228  | t | c | -0.07 | 0.02 | 9.13E-05 | -0.06 | 0.02 | 1.54E-04 |
| 8  | rs10955242     | 101813630 | a | g | -0.14 | 0.04 | 9.15E-05 | -0.14 | 0.03 | 9.10E-05 |
| 8  | rs13249189     | 101813902 | t | c | -0.14 | 0.04 | 9.15E-05 | -0.14 | 0.03 | 9.10E-05 |
| 8  | rs13250895     | 101814325 | c | g | -0.14 | 0.04 | 9.15E-05 | -0.14 | 0.03 | 9.10E-05 |
| 8  | rs13279103     | 101813797 | t | c | 0.14  | 0.04 | 9.15E-05 | 0.14  | 0.03 | 9.02E-05 |
| 21 | rs11909745     | 30610621  | a | g | -0.09 | 0.02 | 9.15E-05 | -0.08 | 0.02 | 6.79E-04 |
| 7  | rs2188563      | 107373871 | a | g | -0.07 | 0.02 | 9.16E-05 | -0.07 | 0.02 | 6.04E-05 |
| 2  | rs11692064     | 238897587 | c | g | 0.09  | 0.02 | 9.16E-05 | 0.08  | 0.02 | 1.41E-04 |
| 2  | rs11692068     | 238897606 | t | c | -0.09 | 0.02 | 9.16E-05 | -0.08 | 0.02 | 1.41E-04 |
| 2  | rs10187736     | 238887575 | t | c | -0.08 | 0.02 | 9.17E-05 | -0.08 | 0.02 | 1.41E-04 |
| 2  | rs2121472      | 238884837 | t | c | -0.08 | 0.02 | 9.17E-05 | -0.08 | 0.02 | 1.41E-04 |
| 3  | rs9823402      | 179569548 | a | g | 0.06  | 0.02 | 9.18E-05 | 0.07  | 0.02 | 4.73E-05 |
| 2  | rs7567199      | 238880530 | a | g | -0.08 | 0.02 | 9.18E-05 | -0.08 | 0.02 | 1.41E-04 |
| 16 | rs2967393      | 82231669  | t | c | 0.09  | 0.02 | 9.20E-05 | 0.09  | 0.02 | 2.32E-05 |
| 16 | rs2967394      | 82231805  | t | c | -0.09 | 0.02 | 9.20E-05 | -0.09 | 0.02 | 2.29E-05 |

Supp table 4

|    |               |           |   |   |       |      |          |       |      |          |
|----|---------------|-----------|---|---|-------|------|----------|-------|------|----------|
| 10 | rs510550      | 83127985  | a | g | 0.08  | 0.02 | 9.20E-05 | 0.08  | 0.02 | 3.48E-05 |
| 2  | rs7589114     | 205775783 | t | c | 0.07  | 0.02 | 9.25E-05 | 0.07  | 0.02 | 5.13E-05 |
| 2  | rs821490      | 238960572 | a | g | -0.08 | 0.02 | 9.25E-05 | -0.08 | 0.02 | 1.41E-04 |
| 8  | chr8:40568476 | 40568476  | t | g | -0.12 | 0.03 | 9.26E-05 | -0.13 | 0.03 | 3.43E-05 |
| 1  | rs12410523    | 92120137  | a | g | 0.07  | 0.02 | 9.28E-05 | 0.07  | 0.02 | 8.92E-05 |
| 2  | rs6711485     | 238882675 | a | g | 0.08  | 0.02 | 9.30E-05 | 0.08  | 0.02 | 1.45E-04 |
| 2  | rs6754093     | 238882735 | a | c | -0.08 | 0.02 | 9.30E-05 | -0.08 | 0.02 | 1.39E-04 |
| 16 | rs12102745    | 82282017  | a | g | 0.09  | 0.02 | 9.32E-05 | 0.09  | 0.02 | 6.04E-05 |
| 7  | rs10953545    | 107372335 | t | c | 0.07  | 0.02 | 9.32E-05 | 0.07  | 0.02 | 6.55E-05 |
| 2  | rs62196019    | 239014715 | a | g | 0.08  | 0.02 | 9.33E-05 | 0.08  | 0.02 | 1.47E-04 |
| 16 | rs9944350     | 82247882  | a | t | 0.09  | 0.02 | 9.33E-05 | 0.10  | 0.02 | 1.72E-05 |
| 5  | rs814778      | 5125672   | a | g | -0.09 | 0.02 | 9.33E-05 | -0.09 | 0.02 | 1.13E-04 |
| 9  | rs10118000    | 30460163  | a | g | -0.13 | 0.03 | 9.33E-05 | -0.12 | 0.03 | 2.39E-04 |
| 2  | rs7594965     | 238911101 | a | c | -0.08 | 0.02 | 9.35E-05 | -0.08 | 0.02 | 1.43E-04 |
| 2  | rs11690668    | 238896958 | t | c | -0.08 | 0.02 | 9.40E-05 | -0.08 | 0.02 | 1.43E-04 |
| 5  | rs10477601    | 119783561 | a | g | 0.11  | 0.03 | 9.41E-05 | 0.11  | 0.03 | 6.31E-05 |
| 2  | rs7571858     | 59769273  | t | g | 0.06  | 0.02 | 9.42E-05 | 0.07  | 0.02 | 3.48E-05 |
| 2  | rs10490046    | 40630678  | a | c | 0.07  | 0.02 | 9.43E-05 | 0.07  | 0.02 | 7.23E-05 |
| 3  | rs7611373     | 2917437   | a | g | -0.06 | 0.02 | 9.43E-05 | -0.07 | 0.02 | 2.64E-05 |
| 2  | rs4663819     | 238897374 | a | g | -0.08 | 0.02 | 9.45E-05 | -0.08 | 0.02 | 1.38E-04 |
| 16 | rs11641647    | 7194840   | a | g | -0.07 | 0.02 | 9.45E-05 | -0.07 | 0.02 | 5.67E-05 |
| 2  | rs1446930     | 238870879 | t | c | -0.08 | 0.02 | 9.45E-05 | -0.08 | 0.02 | 1.27E-04 |
| 9  | rs56327111    | 14481382  | a | g | -0.10 | 0.03 | 9.47E-05 | -0.10 | 0.02 | 6.32E-05 |
| 2  | rs6726393     | 238891591 | a | g | 0.08  | 0.02 | 9.52E-05 | 0.08  | 0.02 | 1.47E-04 |
| 2  | rs7422865     | 238892692 | t | c | 0.08  | 0.02 | 9.52E-05 | 0.08  | 0.02 | 1.47E-04 |
| 19 | rs7253485     | 44625042  | a | g | -0.08 | 0.02 | 9.55E-05 | -0.08 | 0.02 | 1.85E-04 |
| 2  | rs10167252    | 238872246 | t | c | 0.08  | 0.02 | 9.57E-05 | 0.08  | 0.02 | 1.29E-04 |
| 9  | rs7033109     | 614905    | t | c | 0.08  | 0.02 | 9.59E-05 | 0.07  | 0.02 | 2.70E-04 |
| 5  | rs446989      | 14106171  | a | g | -0.08 | 0.02 | 9.62E-05 | -0.08 | 0.02 | 9.11E-05 |
| 2  | rs10048814    | 238897755 | t | c | -0.08 | 0.02 | 9.63E-05 | -0.08 | 0.02 | 1.46E-04 |
| 2  | rs4663276     | 238898809 | a | g | -0.08 | 0.02 | 9.63E-05 | -0.08 | 0.02 | 1.46E-04 |
| 3  | rs4677086     | 72158332  | c | g | -0.06 | 0.02 | 9.68E-05 | -0.06 | 0.02 | 8.72E-05 |
| 2  | rs10166061    | 238906511 | t | c | -0.08 | 0.02 | 9.69E-05 | -0.08 | 0.02 | 1.49E-04 |
| 2  | rs10048643    | 238897934 | a | g | 0.08  | 0.02 | 9.70E-05 | 0.08  | 0.02 | 1.48E-04 |
| 2  | rs7572717     | 238890316 | a | t | -0.08 | 0.02 | 9.77E-05 | -0.08 | 0.02 | 1.50E-04 |
| 3  | rs1580953     | 72154835  | a | t | 0.06  | 0.02 | 9.77E-05 | 0.06  | 0.02 | 8.42E-05 |
| 2  | rs10203101    | 238903310 | t | c | -0.08 | 0.02 | 9.78E-05 | -0.08 | 0.02 | 1.48E-04 |
| 2  | rs4461215     | 238883966 | a | g | -0.08 | 0.02 | 9.79E-05 | -0.08 | 0.02 | 1.52E-04 |
| 2  | rs10469607    | 238904792 | a | g | -0.08 | 0.02 | 9.81E-05 | -0.08 | 0.02 | 1.49E-04 |
| 19 | rs9646633     | 44575027  | a | g | -0.09 | 0.02 | 9.82E-05 | -0.08 | 0.02 | 3.12E-04 |
| 2  | rs2418867     | 59772602  | t | c | 0.07  | 0.02 | 9.83E-05 | 0.07  | 0.02 | 4.59E-05 |
| 7  | rs4727685     | 107372058 | a | g | -0.07 | 0.02 | 9.85E-05 | -0.07 | 0.02 | 6.54E-05 |
| 4  | rs4833093     | 38789740  | t | g | -0.07 | 0.02 | 9.90E-05 | -0.08 | 0.02 | 1.38E-05 |
| 2  | rs10929255    | 238879302 | a | g | -0.08 | 0.02 | 9.90E-05 | -0.08 | 0.02 | 1.34E-04 |
| 4  | rs6531663     | 38792340  | t | c | 0.07  | 0.02 | 9.91E-05 | 0.08  | 0.02 | 1.38E-05 |
| 8  | rs7016174     | 101811248 | a | c | 0.14  | 0.04 | 9.92E-05 | 0.13  | 0.03 | 1.00E-04 |
| 2  | rs1446924     | 238877740 | a | g | 0.08  | 0.02 | 9.94E-05 | 0.08  | 0.02 | 1.33E-04 |
| 8  | rs596681      | 2860602   | a | c | -0.11 | 0.03 | 9.98E-05 | -0.11 | 0.03 | 9.87E-05 |
| 11 | rs110420      | 8253049   | t | c | 0.06  | 0.02 | 9.99E-05 | 0.06  | 0.02 | 1.03E-04 |
| 2  | rs6431570     | 238924568 | a | g | -0.08 | 0.02 | 1.00E-04 | -0.08 | 0.02 | 1.53E-04 |

<sup>a</sup> P values are sorted in ascending order in this column
